# Supplementary material
Source: publisher figshare collection journal article supplement (https://tandf.figshare.com/ndownloader/files/12404378)

Supporting Information for

**Synthesis of new thioxanthenes by organocatalytic intramolacular Friedel-Crafts reaction**

Tülay YILDIZ

*Department of Chemistry, University of Istanbul, Istanbul, Avcilar, 34320, Turkey*

[tulayyil@istanbul.edu.tr](mailto:tulayyil@istanbul.edu.tr)

**1.General Information**

The majority of the chemicals used in this work were commercially available from Merck or Aldrich. The starting carbinols **1a**-**1v** were prapared by coupling reaction of 2-fluorobenzaldehyde and substituted thiophenols and then Grignard reaction of 2-thioetherbenzaldehydes and some arylmagnesium bromides. All substrates were purified by crystallization or column chromatography and were characterized by IR, 1H-NMR, 13C-NMR, elementel analysis and GC-MS. All novel pruducts were characterized by IR, 1H-NMR, 13C-NMR, elementel analysis and GC-MS. The reactions were monitored by TLC using silica gel plates and the products were purified by flash column chromatography on silica gel (Merck; 230–400 mesh), eluting with hexane-ethyl acetate (v/v 9:1). NMR spectra were recorded at 500 MHz for 1H and 125 MHz for 13C using Me4Si as the internal standard in CDCl3. GC-MS were recorded on Shimadzu/ QP2010 Plus. IR spectra were recorded on a Bruker Vertex 70 IR spectrometer.

**2.Synthesis of *N*-triflylphosphoramide (3g):** Diphenylphosphochloridate (1.1 mL, 5.3 mmol, 1 equiv.) was dissolved in DCM (20 mL). Triethylamine (5.1 mL, 36.8 mmol, 7 equiv.) was added at 0 °C. DMAP (1.28 g, 10.5 mmol, 2 equiv.) and trifluoromethanesulfonamide TfNH2 (940 mg, 6.3 mmol, 1.2 equiv.) were added to the reaction mixture at 0 °C. The cold bath was removed and the reaction mixture was stirred for 2 hours at room temperature, then heated at reflux for 1 hour. The conversion of the phosphochloridate was monitored by 31P NMR spectroscopy: disappearance of the signal for the starting material at 7.2 ppm and appearance of a new singlet at –12.9 ppm. DCM (15 mL) was then added and the organic layer was washed with water (20 mL). The organic layer was washed with hydrochloric acid (37%) until no traces of triethylamine and DMAP were observed in the 1H NMR spectrum. The organic layer was then dried over Na2SO4, filtered and the solvent was removed under vacuum. The resulting white solid was dissolved in DCM and cooled to –30 °C to give white crystals 0.89 g, Yield = 60%, m.p. = 93–94 °C.

**3.General procedure for reduction of the coupling reaction:**1

To a solution of DMF (10 mL) containing 2- fluorobenzaldehyde (5.0 mmol) and thiophenol (5.0 mmol) was added K2CO3 (5.0 mmol) and the reaction mixture was stirred for 2 hours at 180 0C under an nitrogen atmosphere. It was cooled to room temperature and after usual workup and concentration, the product was purified over silica gel.

Thus, 2- thioetherbenzaldehydes were prepared in good yields with 95-100% (Scheme 1).

**Scheme 1.** The Ullmann type reaction of 2-fluorobenzaldehyde and thiophenols.

**4.General procedure for Grignard reaction:**

For grignard solution, to Mg (2 mmol) was added bromo substrates (1.2 mmol) in dry THF and the mixture was heated under reflux and N2 for 0,5-1 h then cooled to room temperature. 2-thioetherbenzaldehydes (1 mmol) was solved in dry THF and cooled to 0 °C. Then grignard solution was added to aldehyde solution and stirred for 1 hours. The end of the reaction was quenched with saturated NH4Cl solution, extracted ethyl acetate 3 times. After usual workup and concentration, the crude was purified over silica gel.

Diarylcarbinol compounds including thioether group were obtained with very high yields (95-100%) (Scheme 2).

**Scheme 2.** The Grignard reaction of 2-thioetherbenzaldehyde.

**5.General procedure for intramolecular Friedel Crafts cyclization:**

To a stirred solution of a starting alcohol compound (**1a**-**1v**) (0.1 mmol) in dry THF (2.5 mL) was added *N*-triflylphosphoramide(**3h**) (10 mol %) at room temperature and the reaction was stirred for 15 min. After the completion of the reaction as observed on TLC, the mixture was concentrated in vacuo and was extracted with ethylacetate. After usual reaction workup and concentration, the product was charged on silica gel.

**6.Experimental Characterization Data of 1a-1v and 2a-2v**

***Phenyl-(2-phenylsulfanyl-phenyl)-methanol* 1a:[1]**

**IR** (cm–1) ν 3361, 3059, 3028, 2961, 2925, 2884,1594, 1223, 1019, 746, 689. **1H NMR** (500 MHz, CDCl3) δ 7.63 (dd, *J1* = 1.0 Hz, *J2* = 8.5 Hz, 1H), 7.41-7.32 (m, 6H), 7.30-7.21 (m, 7H), 6.41 (s, 1H), 2.62 (br s, 1H). **13C NMR** (150 MHz, CDCl3) δ 145.0, 142.8, 136.4, 134.0, 132.7, 129.8, 129.2, 128.4, 127.8, 127.4, 126.9, 126.6, 73.2. **MS** (m/z) = 51, 77, 105, 137, 152, 181, 197, 213, 274, 292 (M+). Anal. Calcd. for C19H16OS: C, 78.05; H, 5.52; S, 10.97. Found: C, 78.16; H, 5.65, S, 10.85.

***[2-(4-Methoxy-phenylsulfanyl)-phenyl]-phenyl-methanol* 1b:**

**IR** (cm–1) ν 3346, 3060, 3028, 2961, 2836 1591, 1492, 1287, 1021, 750, 695. **1H NMR** (500 MHz, CDCl3) δ 7.55 (dd, *J1* = 1.5 Hz, *J2* = 6.0 Hz, 1H), 7.45-7.43 (m, 2H), 7.38-7.34 (m, 2H), 7.32-7.23 (m, 5H), 7.18 (ddd, *J1* = 1.5 Hz, *J2=J3* = 6.0 Hz, 1H), 7.12(d, *J* = 8.0 Hz, 1H), 6.89 (d, *J* = 9.0 Hz, 1H), 6.40 (s, 1H), 3.82 (s, 3H), 2.70 (br s, 1H). **13C NMR** (150 MHz, CDCl3) δ 159.5, 142.7, 142.6, 141.01, 135.8, 134.4, 130.6-128.3(9C), 125.0, 120.5, 115.0, 73.1, 55.4. **MS** (m/z) = 51, 77, 108, 139, 165, 197, 213, 227, 259, 273, 303, 322 (M+). Anal. Calcd. for C20H18O2S: C, 74.50; H, 5.63; S, 9.95. Found: C, 74.75; H, 5.76; S, 9.82.

***(4-Methoxy-phenyl)-(2-p-tolylsulfanyl-phenyl)-methanol* 1c:**

**IR** (cm–1) ν 3337, 3057, 2955, 2932, 2834, 1586, 1509, 1171, 1016, 804, 750. **1H NMR** (500 MHz, CDCl3) δ 7.61 (d, *J* = 9.5 Hz, 1H), 7.33-7.28 (m, 3H), 7.24-7.16 (m, 3H), 7.10 (m, 2H), 6.86 (d, *J* = 9.0 Hz, 2H), 6.78 (d, *J* = 10.0 Hz, 1H), 6.32 (s, 1H), 3.80 (s, 3H), 3.78 (s, 1H), 2.34 (s, 3H). **13C NMR** (150 MHz, CDCl3) δ 158.9, 144.1, 137.1, 132.5, 131.9, 131.1, 130.0-127.5 (7C), 127.2, 116.0, 114.8, 113.7, 72.8, 55.2, 21.0. **MS** (m/z) = 51, 77, 91, 108, 136, 152, 181, 211, 227, 244, 303, 320, 336 (M+). Anal. Calcd. for C21H20O2S: C, 74.97; H, 5.99; S, 9.53. Found: C, 75.06; H, 6.05¸ S, 9.46.

***[2-(4-Chloro-phenylsulfanyl)-phenyl]-phenyl-methanol* 1d:**

**IR** (cm–1) ν 3463, 3082, 2916, 2881, 1570, 1474, 1388, 1091, 1011, 818, 702. **1H NMR** (500 MHz, CDCl3) δ 7.65 (dd, *J1* = 1.0 Hz, *J2* = 8.0 Hz, 1H), 7.40-7.25 (m, 8H), 7.20 (d, *J* = 8.5 Hz, 2H), 7.07 (d, *J* = 8.5 Hz, 2H), 6.36 (s, 1H), 2.43 (br s, 1H). **13C NMR** (150 MHz, CDCl3) δ 145.2, 142.7, 135.1, 134.2, 132.5, 132.0, 130.8, 130.7, 129.3, 129.1, 128.5, 128.4, 128.3, 127.8, 127.5, 127.0, 126.8, 73.3. **MS** (m/z) = 51, 77, 105, 152, 165, 181, 213, 231, 247, 273, 307, 326 (M+). Anal. Calcd. for C19H15ClOS: C, 69.82; H, 4.63; S, 9.81. Found: C, 69.93; H, 4.75; S, 9.73.

***[2-(4-Bromo-phenylsulfanyl)-phenyl]-p-tolyl-methanol* 1e:**

**IR** (cm–1) ν 3191, 3061, 2928, 2858, 2320, 1582, 1263, 1174, 760, 729, 687, 609. **1H NMR** (500 MHz, CDCl3) δ 7.70 (dd, *J1* = 1.5 Hz, *J2* = 6.5 Hz, 1H), 7.42 (ddd, *J1* = 1.0 Hz, *J2* =*J3*= 7.5 Hz, 1H), 7.35-7.25 (m, 4H), 7.23-7.21 (m, 2H), 7.12-7.05 (m, 2H), 6.98-6.96 (m, 1H), 6.74 (d, *J* = 8.5 Hz, 1H), 6.31 (s, 1H), 2.23 (s, 3H), 2.30 (s, 1H). **13C NMR** (150 MHz, CDCl3) δ 145.5, 137.4, 134.5, 132.0-129.1 (9C), 128.8, 128.4, 127.7, 126.9, 120.2, 115.0, 73.3, 21.1. **MS** (m/z) = 51, 65, 77, 109, 137, 165, 197, 213, 228, 353, 384 (M+). Anal. Calcd. for C20H17BrOS: C, 62.34; H, 4.45; S, 8.32. Found: C, 62.47; H, 4.48; S, 8.21.

***[2-(4-Fluoro-phenylsulfanyl)-phenyl]-phenyl-methanol* 1f:**

**IR** (cm–1) ν 3438, 3086, 2956, 2888, 1588, 1487, 1222, 1155, 1087, 759, 700. **1H NMR** (500 MHz, CDCl3) δ 7.61 (d, *J* = 8.0 Hz, 1H), 7.39-7.28 (m, 6H), 7.24-7.20 (m, 4H), 7.00-6.96 (m, 2H), 6.37 (s, 1H), 2.51 (br s, 1H). **13C NMR** (150 MHz, CDCl3) δ 163.0, 161.1, 144.1, 142.7, 133.6, 132.8, 132.8, 132.7, 130.8, 130.7, 128.4, 128.3, 128.0, 127.7, 127.6, 126.9, 116.4, 116.2, 73.2. **MS** (m/z) = 51, 77, 105, 137, 152, 165, 181, 197, 213, 291, 310 (M+). Anal. Calcd. for C19H15FOS: C, 73.52; H, 4.87; S, 10.33. Found: C, 73.66; H, 4.84; S, 10.40.

***(4-Methoxy-phenyl)-(2-phenylsulfanyl-phenyl)-methanol* 1g: [1]**

**IR** (cm–1) ν 3483, 3058, 2930, 2852, 1582, 1509, 1302, 1244, 1031, 732, 689. **1H NMR** (500 MHz, CDCl3) δ 7.65 (dd, *J1* = 1.5 Hz, *J2* = 7.5 Hz, 1H), 7.37 (ddd, *J1* = 1.5 Hz, *J2* =*J3*= 7.5 Hz, 1H), 7.29-7.18 (m, 9H), 6.84 (d, *J* = 9.0 Hz, 2H), 6.33 (s, 1H), 3.80 (s, 3H), 1.57 (br s, 1H),. **13C NMR** (150 MHz, CDCl3) δ 158.9, 145.1, 136.3, 135.1, 133.8, 132.6, 129.9, 129.8, 129.1, 128.4-128.1 (5C), 127.4, 126.6, 113.7, 113.7, 72.9, 55.2. **MS** (m/z) = 51, 65, 77, 109, 137, 152, 165, 184, 197, 213, 227, 244, 304, 322 (M+). Anal. Calcd. for C20H18O2S: C, 74.50; H, 5.63; S, 9.95. Found: C, 74.63; H, 5.72; S, 9.86.

***Naphthalen-1-yl-(2-phenylsulfanyl-phenyl)-methanol* 1h:**

**IR** (cm–1) ν 3534, 3325, 3055, 2924, 2246, 1580, 1475, 1274, 1022, 732, 689. **1H NMR** (500 MHz, CDCl3) δ 7.91-7.81 (m, 3H), 7.60-7.58 (m, 1H), 7.52-7.45 (m, 5H), 7.34-7.23 (m, 7H), 7.11 (s, 1H), 2.07 (s, 1H). **13C NMR** (150 MHz, CDCl3) δ 144.3, 137.9, 136.1, 134.7, 134.1, 134.0, 133.7-130.3 (6C), 129.2, 128.7, 128.3, 127.6, 126.9, 126.1, 125.5, 125.2, 124.3, 123.7, 70.14**. MS** (m/z) = 51, 65, 77, 109, 128, 152, 184, 197, 213, 247, 281, 326, 342 (M+). Anal. Calcd. for C23H18OS: C, 80.67; H, 5.30; S, 9.36. Found: C, 80.98; H, 5.63; S, 9.05.

***(2-Phenylsulfanyl-phenyl)-o-tolyl-methanol* 1i:**

**IR** (cm–1) ν 3191, 3061, 2928, 1582, 1476, 1263, 1023, 760, 729, 687. **1H NMR** (500 MHz, CDCl3) δ 7.40-7.34 (m, 3H), 7.30-7.21 (m, 9H), 7.17-7.15 (m, 1H), 6.49 (s, 1H), 2.31 (s, 1H), 2.24 (s, 3H). **13C NMR** (150 MHz, CDCl3) δ 144.1, 140.4, 136.1, 135.8, 133.9, 133.7, 130.4, 130.3, 130.2, 129.2, 129.1, 128.4, 128.1, 127.8, 127.5, 126.8, 126.4, 125.9, 70.3, 19.2. **MS** (m/z) = 51, 65, 77, 91, 109, 137, 152, 165, 184, 197, 213, 255, 273, 291, 306 (M+). Anal. Calcd. for C20H18OS: C, 78.39; H, 5.92; S, 10.46. Found: C, 78.43; H, 5.97; S, 10.39.

***(2-Phenylsulfanyl-phenyl)-p-tolyl-methanol* 1j: [2]**

**IR** (cm–1) ν 3444, 3061, 2918, 2851, 1614, 1459, 1388, 1223, 1107, 1026, 748. **1H NMR** (500 MHz, CDCl3) δ 7.37 (dd, *J1* = 1.5 Hz, *J2* = 7.5 Hz, 1H), 7.36 (d, *J* = 8.0 Hz, 1H), 7.28-7.20 (m, 9H), 7.11 (d, *J* = 8.0 Hz, 2H), 6.35 (s, 1H), 2.42 (br s, 1H), 2.34 (s, 3H). **13C NMR** (150 MHz, CDCl3) δ 145.1, 139.9, 137.1, 136.4, 133.9-133.8 (6 C), 132.7, 129.9, 129.1, 129.0, 128.3, 127.6, 126.9, 126.8, 73.1, 21.1. **MS** (m/z) = 51, 65, 77, 91, 109, 137, 152, 165, 181, 197, 213, 227, 273, 287, 306 (M+). Anal. Calcd. for C20H18OS: C, 78.39; H, 5.92; S, 10.46. Found: C, 78.41; H, 5.96; S, 10.35.

***(2-Phenylsulfanyl-phenyl)-thiophen-2-yl-methanol* 1k**

**IR** (cm–1) ν 3369, 3058, 1475, 1294, 1021, 737, 688. **1H NMR** (500 MHz, CDCl3) δ 7.74 (dd, *J1* = 1.5 Hz, *J2* = 7.5 Hz, 1H), 7.40 (ddd, *J1* = 1.5 Hz, *J2* =*J3*= 7.5 Hz, 1H), 7.36 (dd, *J1* = 1.5 Hz, *J2* = 8.0 Hz, 1H), 7.30-7.20 (m, 7H), 6.92 (dd, *J1* = 5.0 Hz, *J2* = 4.5 Hz, 1H), 6.84 (ddd, *J1* = 1.0 Hz, *J2* =*J3*= 4.5 Hz, 1H), 6.59 (s, 1H), 2.82 (br s, 1H). **13C NMR** (150 MHz, CDCl3) δ 147.3, 144.5, 136.2, 133.0, 132.5, 129.9, 129.8, 129.2, 129.1, 128.7, 128.4, 127.3, 126.7, 126.6, 125.4, 125.2, 69.7. MS (m/z) = 51, 77, 109, 137, 152, 171, 197, 213, 249, 279, 298 (M+). Anal. Calcd. for C17H14OS2: C, 68.42; H, 4.73; S, 21.49. Found: C, 68.55; H, 4.63; S, 21.57.

***1-Phenyl-1-(2-phenylsulfanyl-phenyl)-ethanol* 1l:**

**IR** (cm–1) ν 3436, 3018, 2362, 1597, 1487, 1463, 1216, 754. **1H NMR** (500 MHz, CDCl3) δ 7.96 (d, *J* = 8.0 Hz, 1H), 7.88 (d, *J* = 8.0 Hz, 1H), 7.84-7.80 (m, 1H), 7.52-7.42 (m, 7H), 7.34-7.21 (m, 4H), 7.09 (s, 1H), 7.04 (d, *J* = 8.5 Hz, 2H), 2.47 (br s, 1H). **13C NMR** (150 MHz, CDCl3) δ 144.6, 137.8, 135.5, 134.5, 133.8, 132.6, 132.0, 131.2, 128.8, 128.7, 128.7, 128.4, 127.6, 126.4, 126.3, 125.6, 125.2, 124.6, 123.5, 121.5, 120.6, 120.5, 70.1. **MS** (m/z) = 51, 77, 94, 141, 152, 170, 183, 215, 250, 263, 231, 250, 281, 300, 326, 358, 402, 420 (M+). Anal. Calcd. for C23H17BrOS: C, 65.56; H, 4.07; S, 7.61. Found: C, 65.85; H, 4.16; S, 7.31.

***[2-(4-Bromo-phenylsulfanyl)-phenyl]-(4-methoxy-phenyl)-methanol* 1m:**

**IR** (cm–1) ν 3284, 3056, 2960, 2833, 1607, 1509, 1246, 1173, 1082, 1033, 815, 784. **1H NMR** (500 MHz, CDCl3) δ 7.73 (dd, *J1* = 1.0 Hz, *J2* = 8.0 Hz, 1H), 7.35-7.23 (m, 6H), 6.97-6.95 (m, 2H), 6.81-6.76 (m, 6H), 6.30 (s, 1H), 4.83 (br s, 1H), 3.78 (s, 3H). **13C NMR** (150 MHz, CDCl3) δ 159.0, 145.4, 135.9, 134.8, 134.5, 132.0, 131.4, 131.0, 130.7, 128.9, 128.8, 128.7, 128.4, 128.0, 127.4, 120.2, 114.8, 113.8, 73.1, 55.8. **MS** (m/z) = 51, 77, 94, 141, 152, 170, 183, 215, 250, 263, 277, 306, 400 (M+). Anal. Calcd. for C20H17BrO2S: C, 59.86; H, 4.27; S, 7.99. Found: C, 60.11; H, 4.12; S, 7.91.

***[2-(4-Bromo-phenylsulfanyl)-phenyl]-o-tolyl-methanol* 1n:**

**IR** (cm–1) ν 3304, 3059, 2960, 2853, 1588, 1470, 1299, 1176, 1085, 1054, 810, 752. **1H NMR** (500 MHz, CDCl3) δ 7.44 (dd, *J1* = 1.5 Hz, *J2* = 7.5 Hz, 1H), 7.39-7.33 (m, 4H), 7.30-7.21 (m, 2H), 7.20-7.14 (m, 3H), 7.05 (d, *J* = 9 Hz, 2H), 6.47 (s, 1H), 2.27 (s, 1H), 2.27 (s, 3H).**13C NMR** (150 MHz, CDCl3) δ 144.5, 140.2, 135.8, 135.6, 134.2, 132.6, 132.1, 131.1, 130.4, 128.6, 128.5, 128.0, 127.7, 127.1, 126.6, 126.0, 120.7, 120.5, 70.4, 19.2. **MS** (m/z) = 51, 77, 109, 184, 195, 211, 245, 263, 277, 366, 384 (M+). Anal. Calcd. for C20H17BrOS: C, 62.34; H, 4.45; S, 8.32. Found: C, 62.53; H, 4.51; S, 8.25.

***Naphthalen-1-yl-(2-p-tolylsulfanyl-phenyl)-methanol* 1o:**

**IR** (cm–1) ν 3442, 3055, 2963, 2836, 1819, 1457, 1383, 1143, 886, 743, 687. **1H NMR** (500 MHz, CDCl3) δ 7.94 (d, *J* = 8.0 Hz, 1H), 7.89 (d, *J* = 8.0 Hz, 1H), 7.84 (d, *J* = 8.0 Hz, 1H), 7.52-7.41 (m, 4H), 7.39-7.37 (m, 1H), 7.30-7.19 (m, 5H), 7.14-7.11 (m, 2H), 6.81 (s, 1H), 2.59 (s, 1H), 2.36 (s, 3H). **13C NMR** (150 MHz, CDCl3) δ 143.4, 137.9, 137.3, 134.8, 133.8, 132.9, 131.8, 131.3, 130.8, 130.1, 128.7, 128.5, 128.3, 128.3, 127.8, 127.6, 126.2, 125.5, 125.3, 125.2, 124.4, 123.8, 70.1, 21.1. **MS** (m/z) = 65, 77, 109, 128, 155, 184, 215, 227, 247, 264, 289, 308, 323, 340, 356 (M+). Anal. Calcd. for C24H20OS: C, 80.86; H, 5.65; S, 8.99. Found: C, 81.02; H, 5.76; S, 8.85.

***(4-Methoxy-phenyl)-[2-(4-methoxy-phenylsulfanyl)-phenyl]-methanol* 1p:**

**IR** (cm–1) ν 3391, 3059, 2955, 2835, 1589, 1461, 1392, 1241, 1171, 1027, 825, 778. **1H NMR** (500 MHz, CDCl3) δ 7.59 (dd, *J1* = 1.5 Hz, *J2* = 8.0 Hz, 1H), 7.33-7.31 (m, 2H), 7.30-7.27 (m, 2H), 7.25 (ddd, *J1* = 1.5 Hz, *J2* = *J*3 = 7.5 Hz, 1H), 7.16 (ddd, *J1* = 1.5 Hz, *J2* = *J3* = 8.0 Hz, 1H), 7.07 7.25 (dd, *J1* = 1.5 Hz, *J2* = 8.0 Hz, 1H), 6.89-6.85 (m, 4H), 6.31 (s, 1H), 3.82 (s, 3H), 3.81(s, 3H), 2.46 (s, 1H). **13C NMR** (150 MHz, CDCl3) δ 159.5, 159.0, 142.8, 135.6, 135.0, 134.4, 130.6, 128.4, 128.3, 127.9, 127.0, 126.9, 126.6, 124.9, 115.0, 114.9, 113.8, 113.7, 72.7, 55.4, 55.3. **MS** (m/z) = 51, 77, 108, 136, 152, 171, 184, 197, 213, 227, 244, 303, 334, 352 (M+). Anal. Calcd. for C21H20O3S: C, 71.56; H, 5.72; S, 9.10. Found: C, 71.61; H, 5.62; S, 8.97.

***[2-(4-Methoxy-phenylsulfanyl)-phenyl]-naphthalen-1-yl-methanol* 1r:**

**IR** (cm–1) ν 3489, 3008, 2937, 2835, 1590, 1492, 1461, 1287, 1027, 782, 729. **1H NMR** (500 MHz, CDCl3) δ 7.98 (d, *J* = 8.5 Hz, 1H), 7.90-7.88 (m, 1H), 7.84 (d, *J* = 8.0 Hz, 1H), 7.39-7.44 (m, 4H), 7.39-7.13 (m, 6H), 7.09 (s, 1H), 6.88 (d, *J* = 9.0 Hz, 2H), 3.82 (s, 3H) 2.56 (br s, 1H). **13C NMR** (150 MHz, CDCl3) δ 159.6, 142.2, 137.9, 136.3, 134.4, 134.3, 133.8, 130.8, 128.7, 128.3, 127.6, 127.5, 127.0, 126.9, 126.1, 125.5, 125.2, 124.8, 124.4, 123.8, 115.0, 115.0, 70.0, 55.4. **MS** (m/z) = 77, 101, 127, 139, 152, 184, 207, 227, 247, 277, 289, 308, 321, 354, 372 (M+). Anal. Calcd. for C24H20O2S: C, 77.39; H, 5.41; S, 8.61. Found: C, 77.51; H, 5.31; S, 8.42.

***[2-(4-Chloro-phenylsulfanyl)-phenyl]-(4-methoxy-phenyl)-methanol* 1s**

**IR** (cm–1) ν 3367, 3060, 2954, 2850, 1609, 1509,1247, 1091, 1033, 813, 756. **1H NMR** (500 MHz, CDCl3) δ 7.71 (dd, *J1* = 1.5 Hz, *J2* = 7.5 Hz, 1H), 7.40 (ddd, *J1* = 1.5 Hz, *J2* = *J3* = 7.5 Hz, 1H), 7.32 (dd, *J1* = 1.5 Hz, *J2* = 8.0 Hz, 1H), 7.28-7.17 (m, 5H), 7.04 (d, *J* = 9.0 Hz, 2H), 6.81 (d, *J* = 9.0 Hz, 2H), 6.29 (s, 1H), 3.79 (s, 3H), 2.41 (br s, 1H). **13C NMR** (150 MHz, CDCl3) δ 159.0, 145.4, 135.1, 134.9, 134.3, 132.3, 131.7, 130.7, 130.6, 129.3, 129.1, 128.7, 128.4, 128.3, 127.5, 127.4, 113.8, 113.7, 72.9, 55.3. **MS** (m/z) = 51, 77, 108, 135, 153, 197, 253, 281, 307, 340, 354 (M+-2). Anal. Calcd. for C20H17ClO2S: C, 67.31; H, 4.80; S, 8.99. Found: C, 67.45; H, 4.61; S, 8.82.

***[2-(4-Fluoro-phenylsulfanyl)-phenyl]-(4-methoxy-phenyl)-methanol* 1t**

**IR** (cm–1) ν 3482, 3061, 2955, 2835, 1609, 1509, 1245, 1223, 1031, 822, 730 . **1H NMR** (500 MHz, CDCl3) δ 7.67 (d, *J* = 8.0 Hz, 1H), 7.36-7.18 (m, 7H), 6.99-6.95 (m, 2H), 6.86-6.83 (m, 2H), 6.30 (s, 1H), 3.80 (s, 3H), 2.42 (br s, 1H). **13C NMR** (150 MHz, CDCl3) δ 163.0, 161.0, 159.0, 144.3, 134.9, 133.4, 132.9, 130.8, 128.4, 128.3, 128.2, 127.9, 127.3, 127.2, 116.3, 116.2, 113.8, 113.7, 72.9, 55.3. **MS** (m/z) = 51, 77, 94, 108, 135, 152, 165, 184, 197, 213, 231, 244, 271, 294, 307, 340 (M+). Anal. Calcd. for C20H17FO2S: C, 70.57; H, 5.03; S, 9.42. Found: C, 70.62; H, 5.44, S, 9.36.

***[2-(4-Chloro-phenylsulfanyl)-phenyl]-naphthalen-1-yl-methanol* 1u**

**IR** (cm–1) ν 3545, 3056, 2922, 2851, 1597, 1509, 1091, 1010, 782, 729. **1H NMR** (500 MHz, CDCl3) δ 7.95 (d, *J* = 8.0 Hz, 1H), 7.88 (d, *J* = 8.0 Hz, 1H), 7.81 (d, *J* = 7.5 Hz, 1H), 7.51-7.42 (m, 6H), 7.33-7.27 (m, 2H), 7.19-7.12 (m, 4H), 7.09 (s, 1H), 2.74 (br s, 1H). **13C NMR** (150 MHz, CDCl3) δ 144.5, 137.9, 134.7, 134.3, 134.2, 133.8, 132.8, 132.7, 131.2, 131.0, 130.8, 129.2, 129.1, 128.7, 128.4, 127.5, 126.2, 125.6, 125.2, 124.6, 124.5, 123.5, 70.0. **MS** (m/z) = 51, 77, 102, 109, 128, 139, 184, 202, 215, 231, 247, 281, 358, 376 (M+). Anal. Calcd. for C23H17ClOS: C, 73.29; H, 4.55; S, 8.51. Found: C, 73.35; H, 4.61; S, 8.45.

***[2-(4-Fluoro-phenylsulfanyl)-phenyl]-naphthalen-1-yl-methanol* 1v**

**IR** (cm–1) ν 3544, 3057, 2923, 1588, 1509, 1223, 1085, 782, 729. **1H NMR** (500 MHz, CDCl3) δ 7.97 (d, *J* = 8.0 Hz, 1H), 7.89 (d, *J* = 8.0 Hz, 1H), 7.81 (d, *J* = 8.0 Hz, 1H), 7.51-7.44 (m, 4H), 7.39-7.33 (m, 2H), 7.30-7.25 (m, 4H), 7.09 (s, 1H), 6.99-6.94 (m, 2H), 2.56 (br s, 1H). **13C NMR** (150 MHz, CDCl3) δ 161.1, 161.1, 143.5, 137.9, 134.3, 133.8, 133.1, 133.0, 130.8, 128.7, 128.4, 128.2, 127.6, 126.2, 125.6, 125.3, 125.2, 124.5, 123.6, 123.5, 116.4, 116.2, 70.0. **MS** (m/z) = 51, 77, 128, 155, 183, 202, 215, 231, 281, 307, 341, 360 (M+). Anal. Calcd. for C23H17FOS: C, 76.64; H, 4.75; S, 8.90. Found: C, 76.75; H, 4.54; S, 8.78.

***9-Phenyl-9H-thioxanthene* 2a: [1]**

**IR** (cm–1) ν 3059, 3029, 2958, 2869, 1772, 1582, 1492, 1261, 729, 694. **1H NMR** (500 MHz, CDCl3) δ 7.48 (dd, *J1* = 1.5 Hz, *J2* = 7.5 Hz, 2H), 7.45 (dd, *J1* = 1.5 Hz, *J2* = 7.5 Hz, 2H), 7.32-7.18 (m, 7H), 7.07-7.05 (m, 2H), 5.37 (s, 1H). **13C NMR** (150 MHz, CDCl3) δ 140.9, 137.3, 133.2, 129.6, 129.5, 128.6, 128.4, 128.1, 127.9, 127.9, 127.8, 127.2, 127.1, 126.9, 126.8, 126.6, 126.5, 126.5, 53.0. **MS** (m/z) = 51, 63, 77, 89, 113, 165, 197, 226, 239, 274 (M+). Anal. Calcd. for C19H14S: C, 83.17; H, 5.14; S, 11.69. Found: C, 83.29; H, 5.23; S, 11.51.

***2-Methoxy-9-phenyl-9H-thioxanthene* 2b:**

**IR** (cm–1) ν 3059, 3027, 2936, 2835, 1590, 1371, 1242, 1029, 749, 697. **1H NMR** (500 MHz, CDCl3) δ 7.68 (dd, *J1* = 1.5 Hz, *J2* = 8.0 Hz, 1H), 7.30-7.27 (m, 2H), 7.20-7.03 (m, 7H), 6.69 (dd, *J1* = 7.0 Hz, *J2* = 9.0 Hz, 2H), 5.21 (s, 1H), 3.70 (s, 3H). **13C NMR** (150 MHz, CDCl3) δ 159.4, 141.8, 141.5, 141.1, 136.8, 135.6, 134.7, 134.0, 128.2, 128.1, 127.9, 127.8, 127.6, 127.6, 125.8, 125.2, 114.8, 114.7, 55.25, 53.4. **MS** (m/z) = 51, 63, 77, 89, 113, 129, 139, 152, 165, 184, 227, 258, 273, 304 (M+). Anal. Calcd. for C20H16OS: C, 78.91; H, 5.30; S, 10.53. Found: C, 79.03; H, 5.34; S, 10.45.

***9-(4-Methoxy-phenyl)-2-methyl-9H-thioxanthene* 2c:**

**IR** (cm–1) ν 3057, 3028, 2959, 2836, 1606, 1579, 1246, 1180, 1060, 806, 742. **1H NMR** (500 MHz, CDCl3) δ 7.46-7.41 (m, 2H), 7.35 (d, 1H, *J* = 10 Hz), 7.29-7.22 (m, 3H), 7.08 (d, 1H, *J* = 9.5 Hz), 6.97 (d, 2H, *J* = 8.5 Hz), 6.76 (d, 2H, *J* = 9 Hz), 5.26 (s, 1H), 3.75 (s, 3H), 2.33 (s, 3H), 2.38 (s, 3H). **13C NMR** (150 MHz, CDCl3) δ 158.1, 137.8, 137.5,137.5, 136.4, 133.4, 133.1, 130.1, 129.6, 129.4, 128.8, 127.6, 127.5, 127.1, 127.0, 126.6, 124.4, 113.5, 55.1, 52.8, 21.1. **MS** (m/z) = 41, 63, 77, 92, 113, 129, 152, 165, 178, 211, 241, 259, 273, 287, 303, 318 (M+). Anal. Calcd. for C21H18OS: C, 79.21; H, 5.70; S, 10.07. Found: C, 79.32; H, 5.83; S, 9.96.

***2-Chloro-9-phenyl-9H-thioxanthene* 2d: [3]**

**IR** (cm–1) ν 3032, 2963, 2886, 1656, 1465, 1296, 1185, 859, 726, 623. **1H NMR** (500 MHz, CDCl3) δ 7.20-7.10 (m, 8H), 7.03 (d, 1H, *J* = 9 Hz), 6.98 (d, 1H, *J* = 9 Hz), 6.78 (dd, *J1* = 3.5 Hz, *J2* = 8.5 Hz, 2H), 5.22 (s, 1H). **13C NMR** (150 MHz, CDCl3) δ 144.3, 143.9, 141.1, 140.8, 135.6, 135.1, 132.7, 132.2, 132.0, 131.6, 130.7, 130.0, 129.1, 128.1, 128.1, 128.0, 127.6, 127.2, 53.4. **MS** (m/z) = 51, 75, 77, 105, 139, 152, 165, 181, 197, 213, 231, 247, 273, 310 (M++2). Anal. Calcd. for C19H13ClS: C, 73.89; H, 4.24; S, 10.38. Found: C, 73.95; H, 4.38; S, 10.26.

***2-Bromo-9-p-tolyl-9H-thioxanthene* 2e:**

**IR** (cm–1) ν 3051, 2964, 2827, 1624, 1585, 1275, 752, 689. **1H NMR** (500 MHz, CDCl3) δ 7.33-6.90 (m, 9H), 6.83-6.75 (m, 2H), 5.33 (s, 1H), 2.31 (s, 3H). **13C NMR** (150 MHz, CDCl3) δ 144.8, 144.5, 138.1, 137.0, 135.0, 134.3, 132.1, 131.9, 131.6, 131.1, 130.6, 130.0, 128.9, 128.8, 128.0, 127.7, 127.0, 119.6, 53.4, 21.1. **MS** (m/z) = 51, 77, 91, 120, 152, 165, 197, 211, 239, 255, 281, 321, 348, 366 (M+). Anal. Calcd. for C20H15BrS: C, 65.40; H, 4.12; S, 8.73. Found: C, 65.53; H, 4.23; S, 8.55.

***2-Fluoro-9-phenyl-9H-thioxanthene* 2f:**

**IR** (cm–1) ν 3061, 3030, 2970, 2870, 1588, 1487, 1223, 1042, 751, 696. **1H NMR** (500 MHz, CDCl3) δ 7.71 (dd, *J1* = 1.5 Hz, *J2* = 7.5 Hz, 1H), 7.26-7.07 (m, 7H), 6.97-6.91 (m, 2H), 6.81-6.75 (m, 2H), 5.21 (s, 1H). **13C NMR** (150 MHz, CDCl3) δ 162.8, 160.8, 143.3, 142.7, 141.2, 141.1, 134.4, 133.3, 133.0, 131.4, 131.4, 130.9, 128.3, 128.2, 128.1, 127.9, 116.2, 116.3, 47.5. **MS** (m/z) = 51, 63, 77, 151, 170, 183, 207, 215, 272, 292 (M+). Anal. Calcd. for C19H13FS: C, 78.05; H, 4.48; S, 10.97. Found: C, 78.12; H, 4.42; S, 10.86.

***9-(4-Methoxy-phenyl)-9H-thioxanthene* 2g: [1]**

**IR** (cm–1) ν 3057, 3005, 2955, 2837, 1605, 1505, 1247, 1179, 747, 689. **1H NMR** (500 MHz, CDCl3) δ 7.36 (dd, *J1* = 1.0 Hz, *J2* = 8.0 Hz, 2H), 7.31 (dd, *J1* = 1.5 Hz, *J2* = 7.5 Hz, 2H), 7.19-7.12 (m, 4H), 6.85 (d, *J* = 9.0 Hz, 2H), 6.65 (d, *J* = 9.0 Hz, 2H), 5.19 (s, 1H), 3.63 (s, 3H). **13C NMR** (150 MHz, CDCl3) δ 158.1, 137.6, 133.1, 132.9, 129.5, 129.4, 129.3, 128.9, 128.8, 127.2, 127.2, 127.1, 126.8, 126.7, 126.6, 126.5, 113.6, 113.5, 55.2, 52.2. **MS** (m/z) = 51, 77, 92, 107, 129, 139, 165, 197, 227, 245, 259, 273, 289, 304 (M+). Anal. Calcd. for C20H16OS: C, 78.91; H, 5.30; S, 10.53. Found: C, 79.02; H, 5.38; S, 10.49.

***9-Naphthalen-1-yl-9H-thioxanthene* 2h: [4]**

**IR** (cm–1) ν 3055, 2971, 2869, 1580, 1438, 1264, 1054, 735, 689. **1H NMR** (500 MHz, CDCl3) δ 8.23 (d, *J* = 8.5 Hz, 1H), 7.98 (d, *J* = 9.0 Hz, 1H), 7.77 (d, *J* = 9.0 Hz, 1H), 7.67-7.24 (m, 6H), 7.09-6.97 (m, 6H), 6.22 (s, 1H). **13C NMR** (150 MHz, CDCl3) δ 139.3, 137.3, 137.2, 136.2, 135.8, 134.8, 133.9, 133.9, 131.8, 131.6, 130.8, 130.4, 130.2, 129.0, 128.6, 127.8, 127.1, 126.6, 125.6, 124.0, 122.2, 121.4, 47.5. **MS** (m/z) = 59, 77, 127, 167, 197, 215, 247, 281, 324 (M+). Anal. Calcd. for C23H16S: C, 85.15; H, 4.97; S, 9.88. Found: C, 85.31; H, 5.14; S, 9.52.

***9-o-Tolyl-9H-thioxanthene* 2i:**

**IR** (cm–1) ν 3021, 2956, 2867, 1581, 1476, 1264, 1033, 731, 689. **1H NMR** (500 MHz, CDCl3) δ 7.47 (d, *J* = 9.0 Hz, 1H), 7.31-7.07 (m, 11H), 5.31 (s, 1H), 2.03 (s, 3H). **13C NMR** (150 MHz, CDCl3) δ 143.0, 142.2, 139.3, 139.0, 137.1, 136.3, 136.0, 135.0, 133.6, 130.8, 130.2, 128.8, 128.3, 128.1, 127.3, 127.2, 126.4, 125.7, 47.5, 19.0. **MS** (m/z) = 41, 51, 65, 77, 91, 100, 113, 136, 152, 165, 197, 211, 226, 239, 252, 271, 288 (M+). Anal. Calcd. for C20H16S: C, 83.29; H, 5.59; S, 11.12. Found: C, 83.35; H, 5.63; S, 10.99.

***9-p-Tolyl-9H-thioxanthene* 2j: [2]**

**IR** (cm–1) ν 3056, 2974, 2864, 1612, 1476, 1264, 1066, 734, 688. **1H NMR** (500 MHz, CDCl3) δ 7.21-6.90 (m, 12H), 5.19 (s, 1H), 2.18 (s, 3H). **13C NMR** (150 MHz, CDCl3) δ 144.3 143.6, 138.5, 138.3, 137.0, 136.0, 136.3, 133.8, 132.4, 130.6, 130.5, 129.5, 129.4, 128.9, 128.7, 127.8, 127.7, 126.0, 47.5, 21.1. **MS** (m/z) = 41, 51, 65, 77, 91, 113, 136, 152, 165, 197, 211, 226, 239, 252, 271, 288 (M+). Anal. Calcd. for C20H16S: C, 83.29; H, 5.59; S, 11.12. Found: C, 83.38; H, 5.62; S, 10.99.

***9-Thiophen-2-yl-9H-thioxanthene* 2k:**

**IR** (cm–1) ν 3104, 3058, 2922, 2869, 1670, 1581, 1475, 1365, 1023, 733, 687. **1H NMR** (500 MHz, CDCl3) δ 7.30-7.24 (m, 2H), 7.18-7.08 (m, 7H), 6.80 (dd, *J1* = 3.5 Hz, *J2* = 5.5 Hz, 1H), 6.73 (ddd, *J1* = *J2* = 1.0 Hz, *J3* = 3.5 Hz, 1H), 5.19 (s, 1H). **13C NMR** (150 MHz, CDCl3) δ 147.3, 144.6, 136.3, 133.9, 132.5, 129.9, 129.2, 129.1, 128.6, 128.5, 127.3, 126.7, 126.6, 125.4, 125.3, 125.2, 45.8. **MS** (m/z) = 45, 51, 69, 75, 88, 101, 123, 152, 165, 197, 205, 231, 234, 247, 280 (M+). Anal. Calcd. for C17H12S2: C, 72.82; H, 4.31; S, 22.87. Found: C, 72.93; H, 4.46; S, 22.60.

***9-Methyl-9-phenyl-9H-thioxanthene* 2l:**

**IR** (cm–1) ν 3022, 2984, 2858, 1597, 1355, 1296, 1064, 785, 694. **1H NMR** (500 MHz, CDCl3) δ 8.77 (d, *J* = 9.5 Hz, 1H), 7.78 (d, *J* = 9.0 Hz, 2H), 7.57-7.35 (m, 3H), 7.28-7.17 (m, 2H), 7.13 (d, *J* = 8.5 Hz, 2H), 6.96-6.90 (m, 2H), 6.68 (d, *J* = 8.0 Hz, 1H), 6.60 (d, *J* = 8.0 Hz, 1H), 5.30 (s, 1H). **13C NMR** (150 MHz, CDCl3) δ 145.9, 135.2, 135.0, 134.0, 133.6, 132.7, 131.8, 131.5, 131.4, 131.1, 128.7, 128.4, 127.6, 127.5, 127.3, 126.7, 126.1, 125.5, 124.8, 124.0, 123.9, 120.2, 46.5. **MS** (m/z) = 51, 77, 91, 120, 152, 165, 197, 211, 231, 250, 281, 300, 342, 402 (M+). Anal. Calcd. for C23H15BrS: C, 68.49; H, 3.75; S, 7.95. Found: C, 68.85; H, 4.12; S, 7.53.

***2-Bromo-9-(4-methoxy-phenyl)-9H-xanthene* 2m:**

**IR** (cm–1) ν 3015, 2961, 2871, 1612, 1591, 1286, 749, 662. **1H NMR** (500 MHz, CDCl3) δ 7.56 (d, *J* = 7.0 Hz, 1H), 7.45 (dd, *J1* = 1.5 Hz, *J2* = 7.5 Hz, 1H), 7.40-7.36 (m, 2H), 7.32-7.25 (m, 3H), 6.95 (d, *J* = 9.0 Hz, 2H), 6.78 (d, *J* = 9.0 Hz, 2H), 5.23 (s, 1H), 3.76 (s, 3H). **13C NMR** (150 MHz, CDCl3) δ 158.3, 139.8, 137.0, 132.5, 132.4, 132.1, 132.0, 129.7, 129.4, 128.9, 128.9, 128.5, 127.1, 127.1, 127.0, 126.8, 120.1, 113.7, 55.1, 52.0. **MS** (m/z) = 63, 77, 113, 129, 152, 196, 227, 245, 258, 277, 303, 353, 382 (M+). Anal. Calcd. for C20H15BrOS: C, 62.67; H, 4.12; S, 8.37. Found: C, 62.71; H, 4.15; S, 8.25.

***2-Bromo-9-o-tolyl-9H-thioxanthene* 2n:**

**IR** (cm–1) ν 3043, 2953, 2862, 1616, 1585, 1271, 1136, 749, 642. **1H NMR** (500 MHz, CDCl3) δ 7.40-7.00 (m, 11H), 5.31 (s, 1H), 2.01 (s, 3H). **13C NMR** (150 MHz, CDCl3) δ 143.8, 143.0, 139.0, 136.9, 136.1, 134.2, 133.1, 131.9, 131.8, 131.1, 130.4, 130.2, 129.0, 128.3, 128.0, 127.5, 125.7, 119.9, 53.4, 18.9. **MS** (m/z) = 63, 77, 113, 129, 131, 139, 165, 189, 195, 218, 245, 263, 366 (M+). Anal. Calcd. for C20H15BrS: C, 65.40; H, 4.12; S, 8.73. Found: C, 65.54; H, 4.20; S, 8.56.

***2-Methyl-9-naphthalen-1-yl-9H-thioxanthene* 2o:**

**IR** (cm–1) ν 3037, 2856, 1603, 1496, 1367, 1221, 961, 749, 613. **1H NMR** (500 MHz, CDCl3) δ 7.95 (d, *J* = 8.5 Hz, 2H), 7.89 (d, *J* = 8.5 Hz, 1H), 7.66 (d, *J* = 5.5 Hz, 1H), 7.54-7.47 (m, 3H), 7.38 (d, *J* = 8.0 Hz, 2H), 7.16 (dd, *J1* = 9.5 Hz, *J2* = 2.0 Hz, 1H), 7.02-6.97 (m, 2H), 6.90 (d, *J* = 8.0 Hz, 1H), 6.74 (m, 1H), 5.66 (s, 1H), 2.10 (s, 3H). **13C NMR** (150 MHz, CDCl3) δ 137.5, 137.3, 137.0, 135.9, 134.4, 132.4, 132.3, 131.5, 129.5, 129.0, 129.0, 128.8, 128.3, 127.5, 127.5, 126.3, 126.3, 126.1, 126.0, 125.9, 125.6, 125.5, 50.1, 21.1. **MS** (m/z) = 41, 51, 77, 89, 127, 160, 178, 196, 211, 226, 247, 261, 289, 303, 323, 338 (M+). Anal. Calcd. for C24H18S: C, 85.17; H, 5.36; S, 9.47. Found: C, 85.27; H, 5.40; S, 9.33.

***2-Methoxy-9-(4-methoxy-phenyl)-9H-thioxanthene* 2p:**

**IR** (cm–1) ν 3059, 2955, 2834, 1608, 1507, 1492, 1242, 1171, 1029, 824, 782. **1H NMR** (500 MHz, CDCl3) δ 7.34 (dd, *J1* = 1.5 Hz, *J2* = 7.5 Hz, 1H), 7.30 (dd, *J1* = 1.5 Hz, *J2* = 7.5 Hz, 1H), 7.26 (d, *J* = 9.0 Hz, 1H), 7.17-7.11 (m, 2H), 6.89-6.85 (m, 3H), 6.73 (dd, *J1* = 2.5 Hz, *J2=* 8.5 Hz, 1H), 6.66 (d, *J* = 8.5 Hz, 2H), 5.13 (s, 1H), 3.71 (s, 3H), 3.63 (s, 3H). **13C NMR** (150 MHz, CDCl3) δ 158.8, 158.2, 139.2, 137.6, 133.7, 132.6, 129.3, 129.0, 128.9, 128.1, 127.2, 127.1, 124.2, 115.3, 115.2, 113.5, 112.6, 112.5, 55.4, 55.1, 52.7. **MS** (m/z) = 51, 77, 115, 139, 184, 227, 259, 281, 304, 324, 334 (M+). Anal. Calcd. for C21H18O2S: C, 75.42; H, 5.43; S, 9.59. Found: C, 75.53; H, 5.49; S, 9.46.

***2-Methoxy-9-naphthalen-1-yl-9H-thioxanthene* 2r:**

**IR** (cm–1) ν 3054, 2972, 2850, 1604, 1506, 1461, 1248, 1179, 1031, 807, 741. **1H NMR** (500 MHz, CDCl3) δ 8.18 (d, *J* = 8.5 Hz, 1H), 7.81-7.75 (m, 1H), 7.66 (d, *J* = 8.5 Hz, 1H), 7.52-7.36 (m, 5H), 7.23-7.14 (m, 2H), 6.89 (d, *J* = 9.0 Hz, 1H), 6.82 (d, *J* = 9.0 Hz, 1H), 6.61 (d, *J* = 9.0 Hz, 1H), 6.56 (d, *J* = 9.0 Hz, 1H), 5.38 (s, 1H), 3.60 (s, 3H). **13C NMR** (150 MHz, CDCl3) δ 158.1, 137.8, 137.0, 134.6, 133.4, 132.9, 132.6, 132.4, 132.1, 131.9, 130.7, 128.9, 128.9, 128.5, 128.3, 127.7, 127.2, 126.8, 126.6, 126.4, 125.4, 113.5, 55.0, 52.8. **MS** (m/z) = 45, 63, 77, 92, 125, 141, 177, 202, 215, 247, 276, 295, 308, 323, 339, 354 (M+). Anal. Calcd. for C24H18OS: C, 81.32; H, 5.12; S, 9.05. Found: C, 81.41; H, 5.24; S, 8.92.

***2-Chloro-9-(4-methoxy-phenyl)-9H-thioxanthene* 2s:**

**IR** (cm–1) ν 3058, 2953, 2834, 1608, 1509, 1473, 1244, 1171, 1064, 810, 775. **1H NMR** (500 MHz, CDCl3) δ 7.26-7.11 (m, 3H), 7.00-6.96 (m, 4H), 6.75 (dd, *J1* = 7.0 Hz, *J2=* 8.5 Hz, 2H), 6.62 (dd, *J1* = 2.0 Hz, *J2=* 9.0 Hz, 2H), 5.21 (s, 1H), 3.66 (s, 3H). **13C NMR** (150 MHz, CDCl3) δ 158.8, 144.6, 144.5, 135.7, 135.3, 133.2, 132.8, 132.2, 131.8, 131.2, 130.4, 129.8, 129.2, 129.1, 129.0, 127.8, 113.5, 67.9, 55.2, 53.4. **MS** (m/z) = 44, 64, 77, 92, 113, 129, 139, 152, 195, 231, 258, 281, 307, 338 (M+). Anal. Calcd. for C20H15ClOS: C, 70.89; H, 4.46; S, 9.46. Found: C, 71.06; H, 4.51; S, 9.30.

***2-Fluoro-9-(4-methoxy-phenyl)-9H-thioxanthene* 2t:**

**IR** (cm–1) ν 3059, 2955, 2851, 1607, 1587, 1508, 1245, 1172, 1032, 823, 750. **1H NMR** (500 MHz, CDCl3) δ 7.35-7.34 (m, 1H), 7.30-7.25 (m, 2H), 7.18-7.12 (m, 2H), 7.02 (dd, *J1* = 3.0 Hz, *J2=* 9.0 Hz, 1H), 6.88-6.84 (m, 3H), 6.68 (d, *J* = 9.0 Hz, 2H), 5.10 (s, 1H), 3.64 (s, 3H). **13C NMR** (150 MHz, CDCl3) δ 162.8, 160.9, 158.4, 140.6, 137.1, 133.1, 131.9, 129.1, 129.0, 128.3, 127.1, 127.0, 126.8, 116.3, 116.2, 116.1, 114.0, 113.7, 55.1, 52.3. **MS** (m/z) = 51, 77, 92, 113, 151, 183, 195, 215, 227, 245, 258, 277, 291, 322 (M+). Anal. Calcd. for C20H15FOS: C, 74.51; H, 4.69; S, 9.95. Found: C, 74.72; H, 4.75; S, 9.58.

***2-Chloro-9-naphthalen-1-yl-9H-thioxanthene* 2u:**

**IR** (cm–1) ν 3053, 2954, 2857, 1597, 1509, 1474, 1263, 1091, 814, 757. **1H NMR** (500 MHz, CDCl3) δ 7.44 (d, *J* = 8.0 Hz, 1H), 7.46-7.42 (m, 1H), 7.28-7.14 (m, 5H), 7.00-6.96 (m, 1H), 6.91-6.71 (m, 5H), 6.58 (d, *J* = 8.5 Hz, 1H), 5.19 (s, 1H). **13C NMR** (150 MHz, CDCl3) δ 143.4, 142.9, 136.9, 136.5, 134.9, 134.7, 133.6, 132.5, 132.1, 131.7, 131.5, 131.1, 129.9, 129.0, 128.6, 128.5, 128.3, 128.3, 126.0, 125.8, 125.2, 123.6, 53.4. **MS** (m/z) = 51, 77, 109, 128, 152, 184, 215, 231, 247, 263, 289, 308, 323, 341, 357 (M+-1). Anal. Calcd. for C23H15ClS: C, 76.97; H, 4.21; S, 8.93. Found: C, 77.16; H, 4.38; S, 8.68.

***2-Fluoro-9-naphthalen-1-yl-9H-thioxanthene* 2v:**

**IR** (KBr, cm–1) ν 3055, 2972, 1589, 1509, 1488, 1223, 1064, 735, 625. **1H NMR** (500 MHz, CDCl3) δ 7.98 (d, *J* = 8.0 Hz, 1H), 7.78 (d, *J* = 8.5 Hz, 1H), 7.67 (d, *J* = 8.5 Hz, 1H), 7.50-7.49 (m, 2H), 7.34-7.29 (m, 3H), 7.21-7.18 (m, 1H), 7.11-7.03 (m, 3H), 6.83 (d, *J* = 9.0 Hz, 1H), 6.98 (dd, *J1* = *J2=* 9.0 Hz, 1H), 5.35 (s, 1H). **13C NMR** (150 MHz, CDCl3) δ 162.5, 160.5, 142.5, 141.7, 137.0, 136.6, 135.3, 135.3, 134.2, 133.6, 131.5, 131.1, 128.8, 128.7, 128.4, 128.3, 128.2, 125.7, 125.1, 123.8, 115.8, 115.6, 47.5. **MS** (m/z) = 51, 77, 83, 109, 128, 137, 155, 183, 202, 215, 231, 247, 263, 289, 321, 341 (M+-1). Anal. Calcd. for C23H15FS: C, 80.67; H, 4.42; S, 9.36. Found: C, 80.80; H, 4.58; S, 9.12.

**References:**

1. Das, S.K.; Singh, R.; Panda, G. *Eur. J. Org. Chem.* **2009**, *28*, 4757.
2. Hori, M.; Kataoka, T.; Shimizu, H.; Ikemori, M.; Aoyama, Y. *Journal of the Chemical Society, Perkin Transactions 1:  Organic and Bio-Organic Chemistry* **1972-1999** (1988), *5*, 1209.
3. Ogura, F.; Hounshell, W. D.; Maryanoff, C. A.; Richter, W. J.; Mislow, K. *Journal of the American Chemical Society* **1976**, *98*(12), 3615.
4. Schonberg, A.; Mustafa, A. *Journal of the Chemical Society***1947**, 997-1000.

**NMR Spectra of all the reported compounds:**


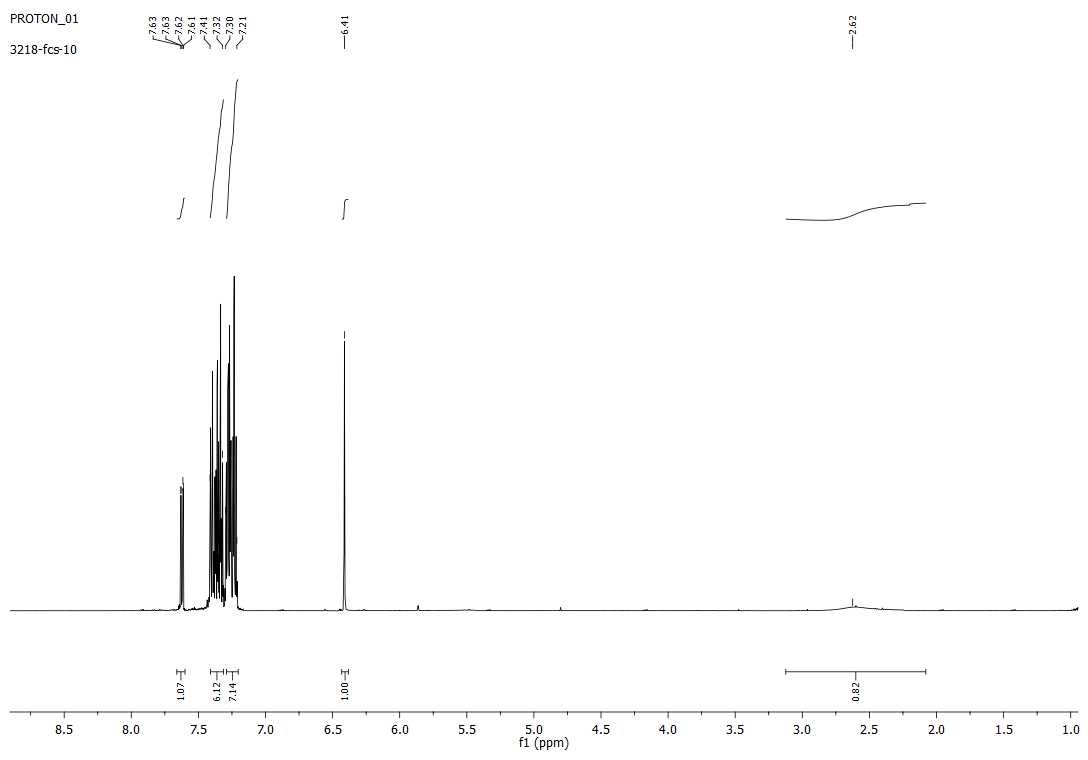


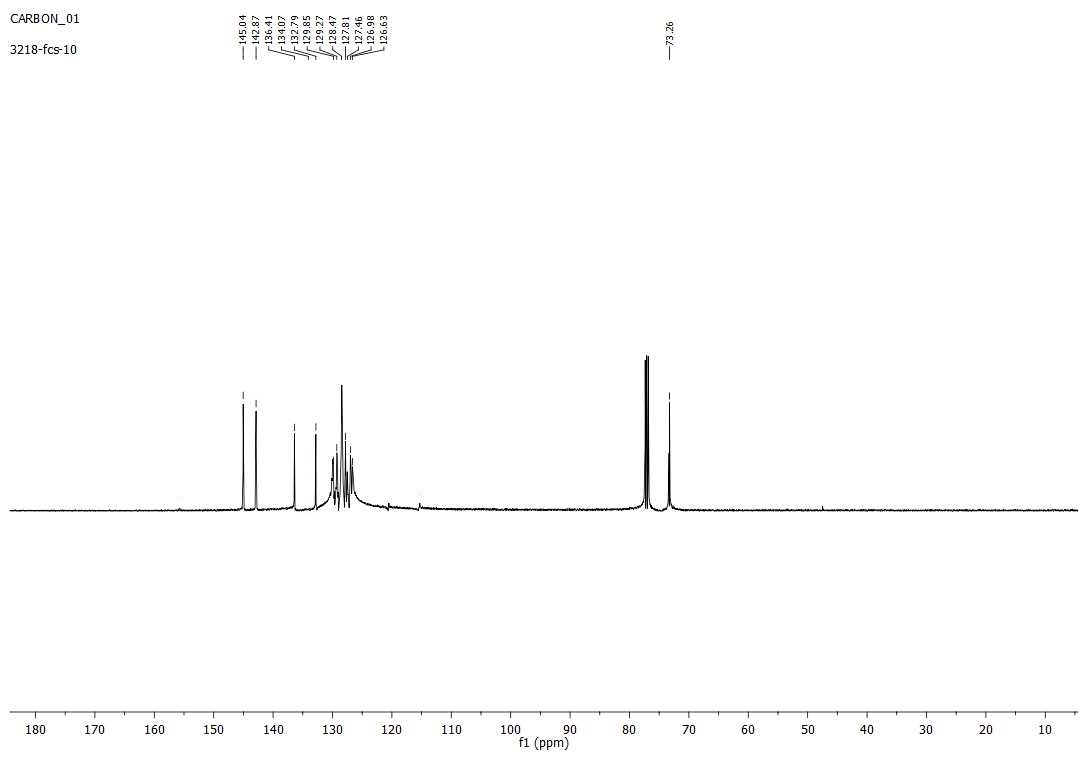


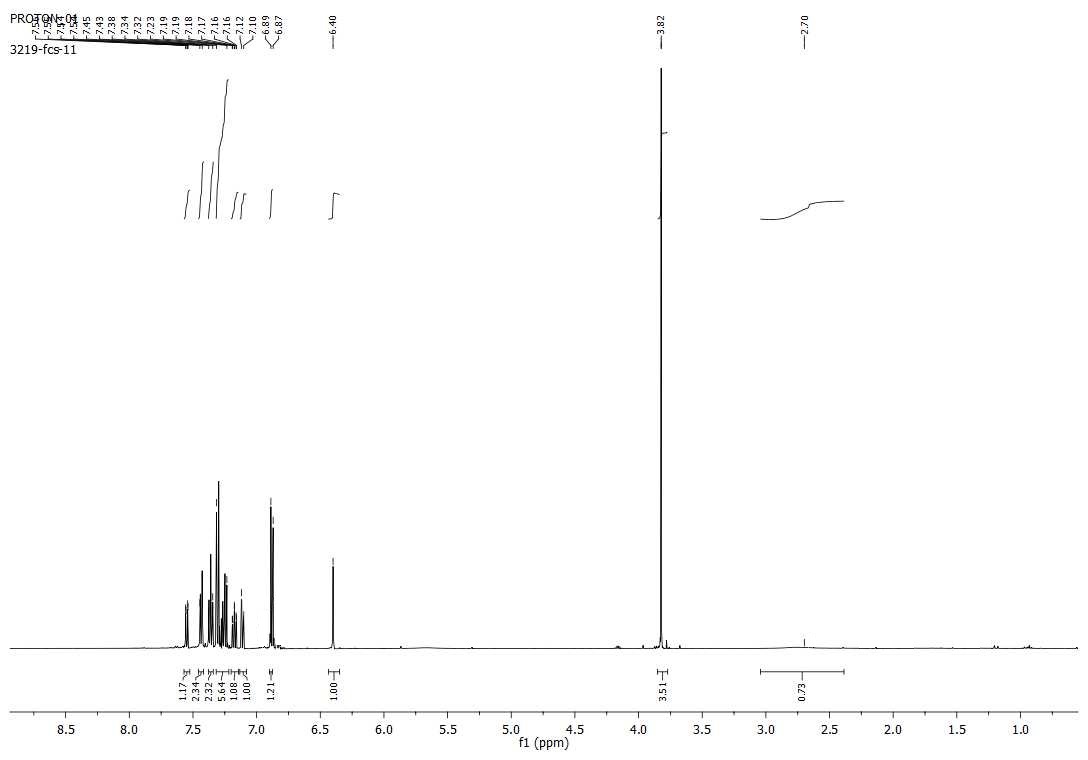


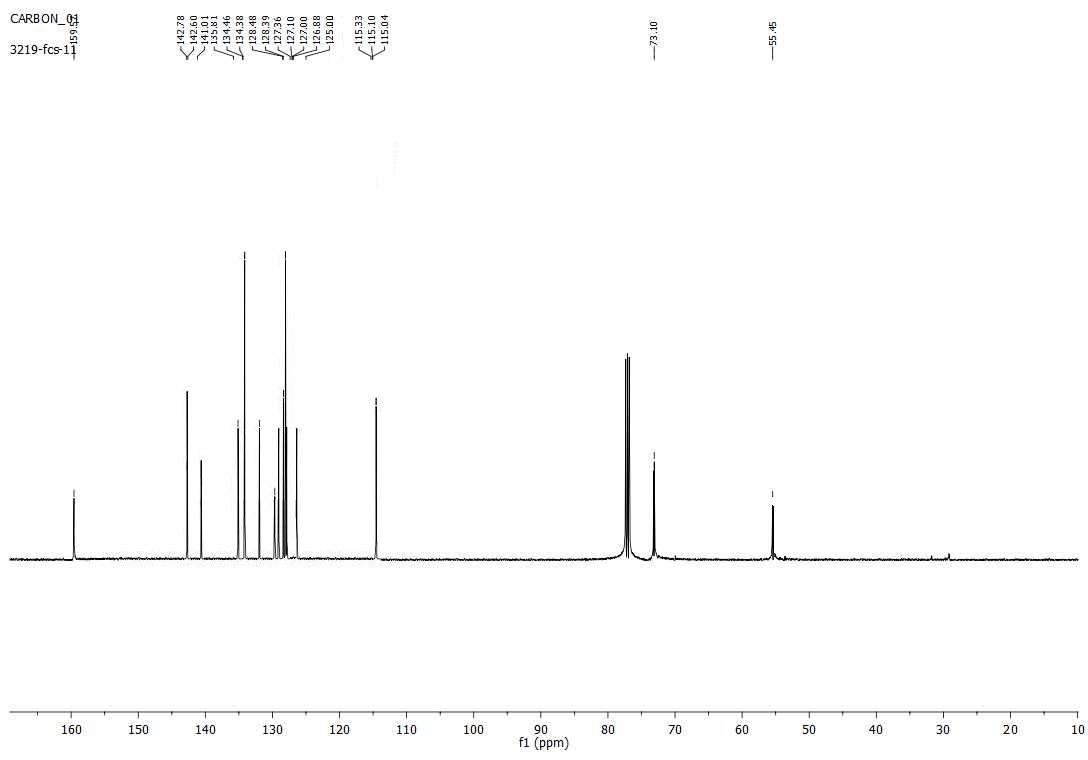


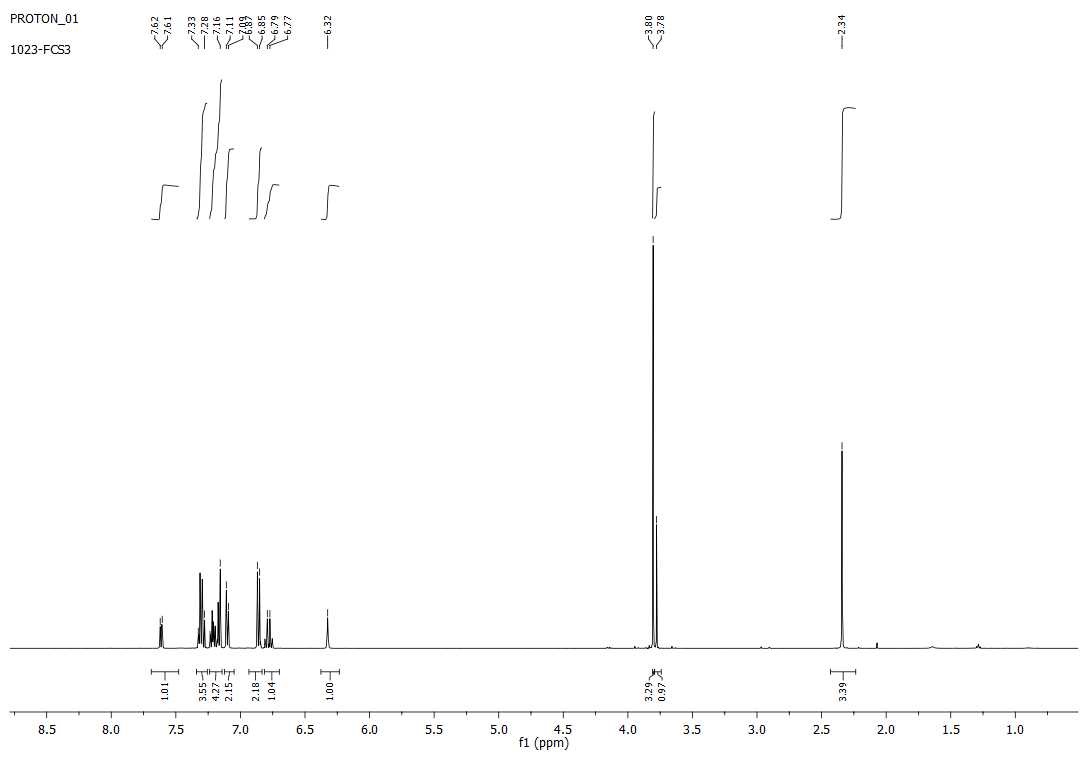


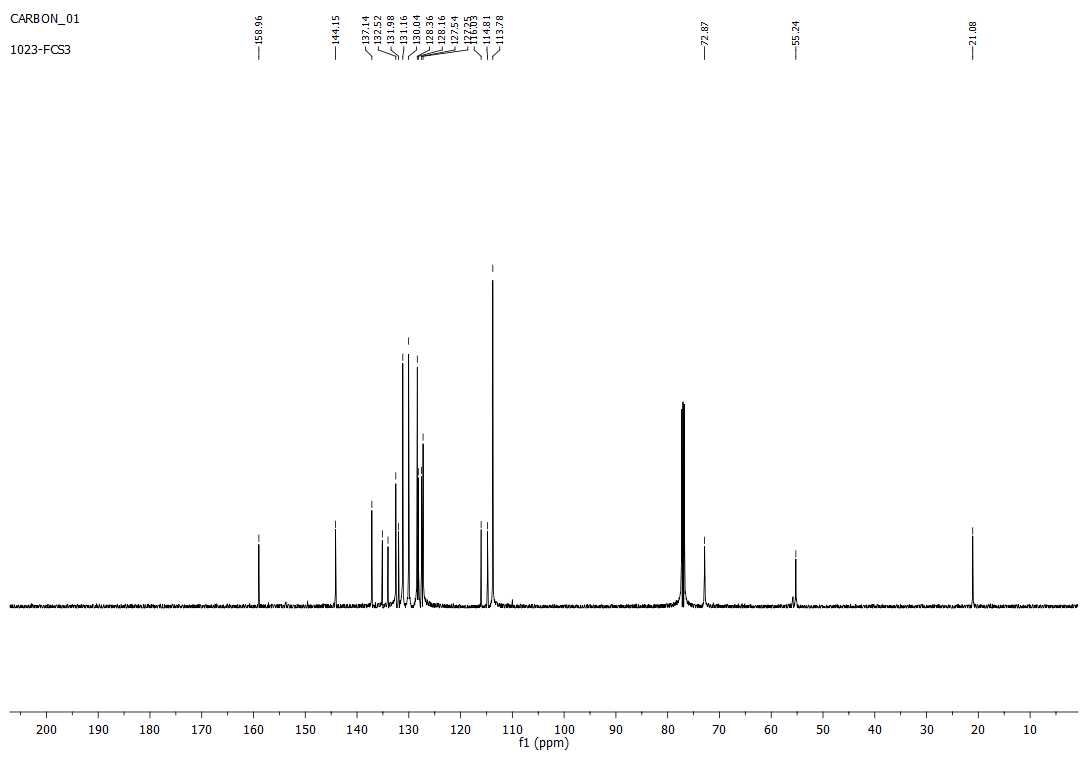


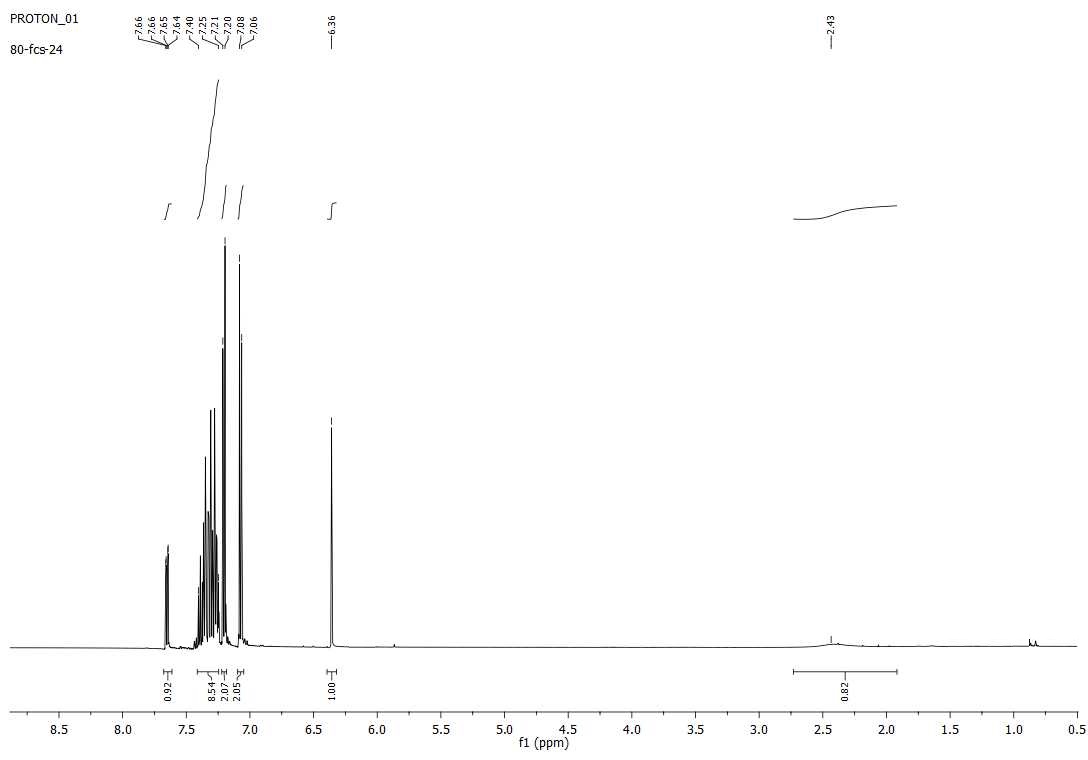


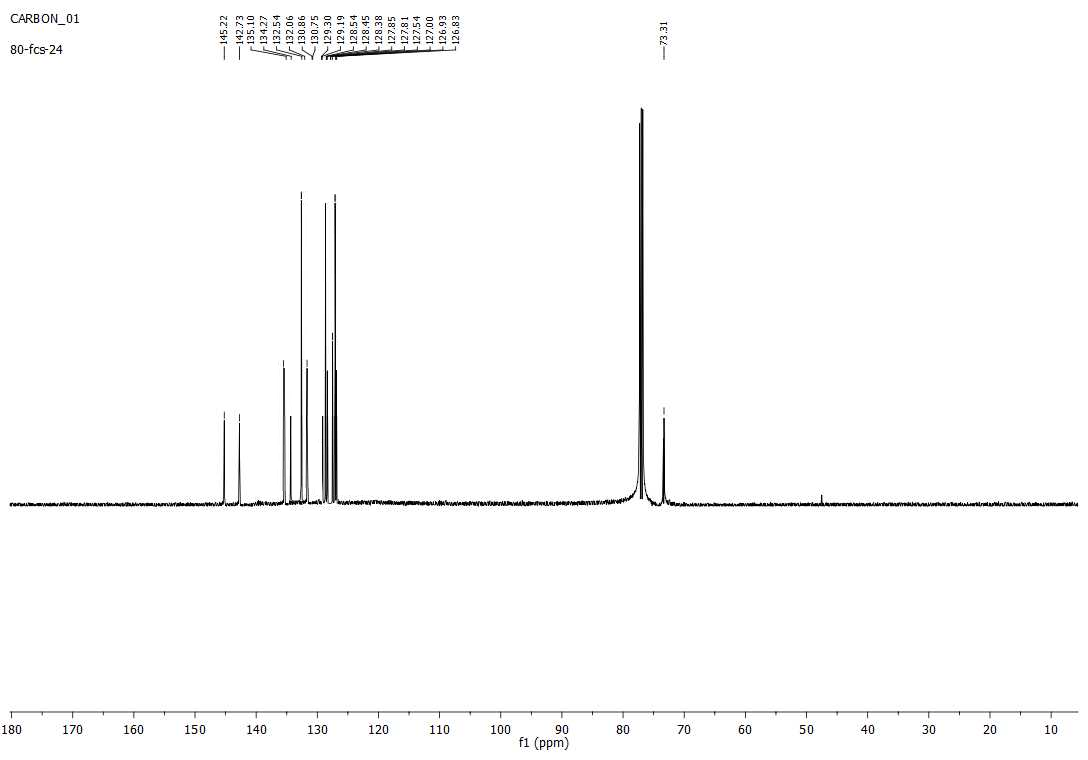


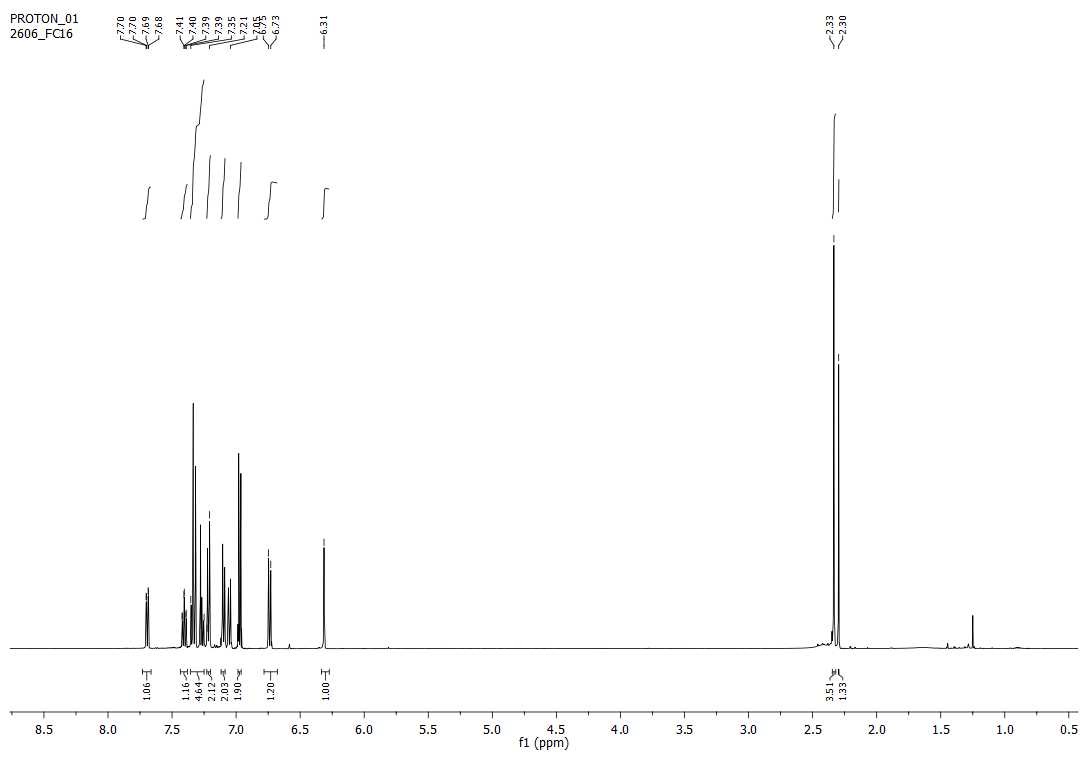


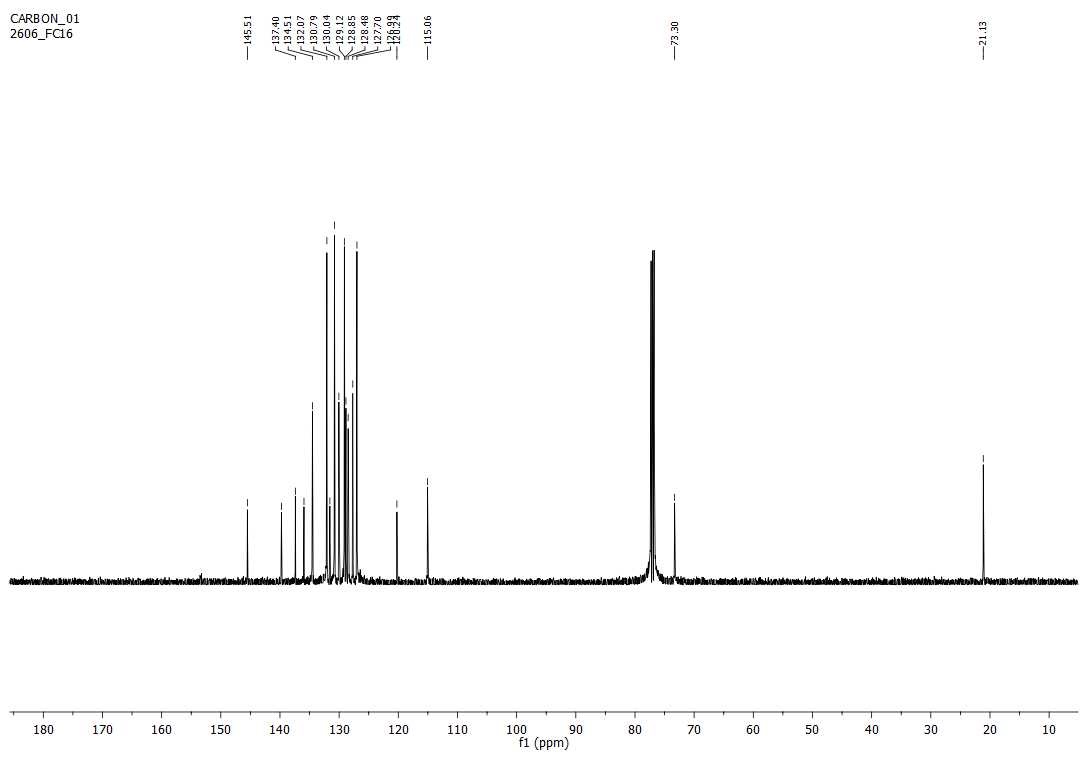


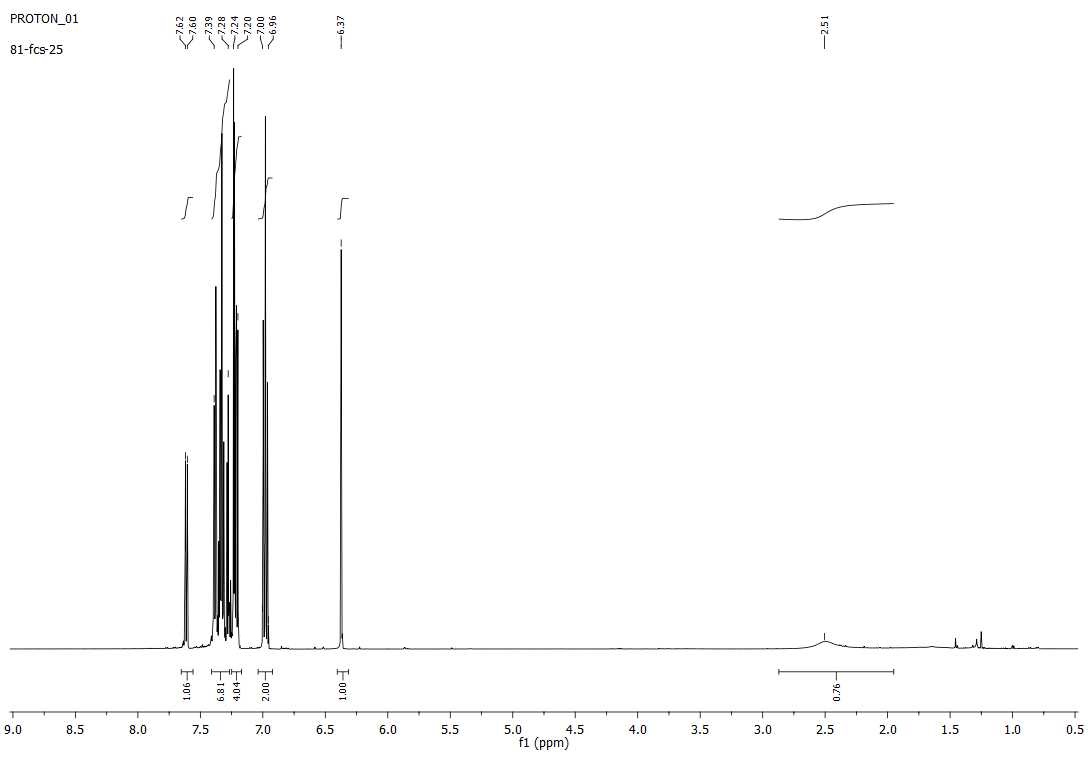


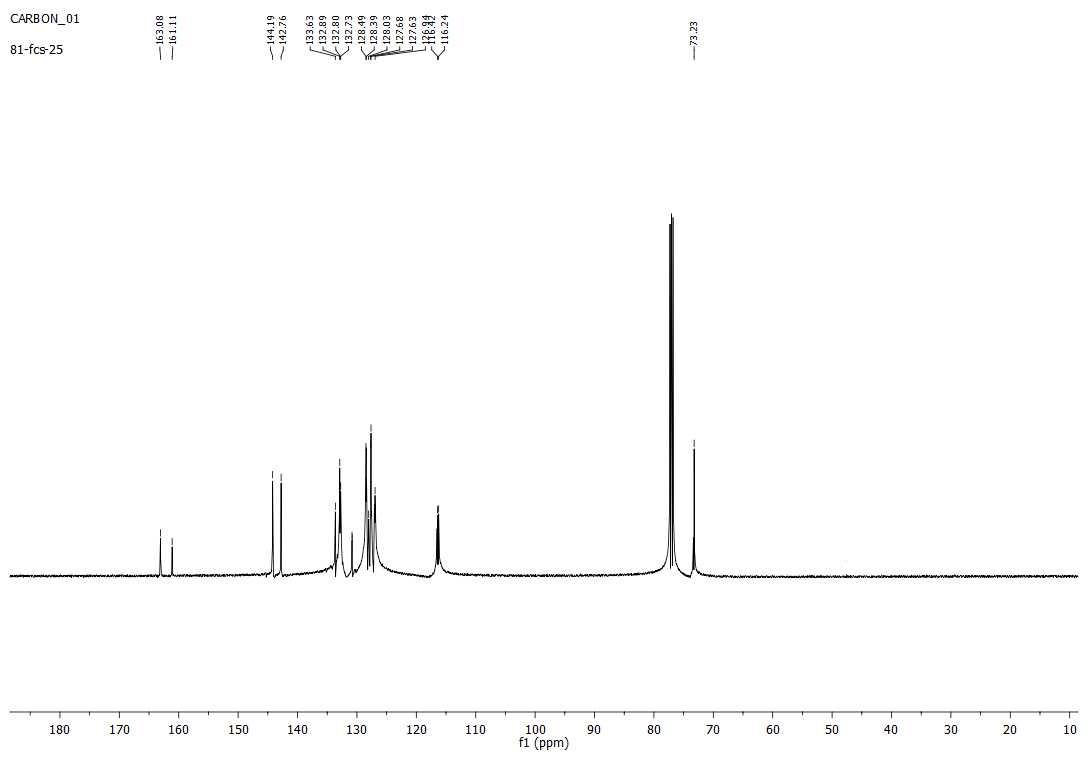


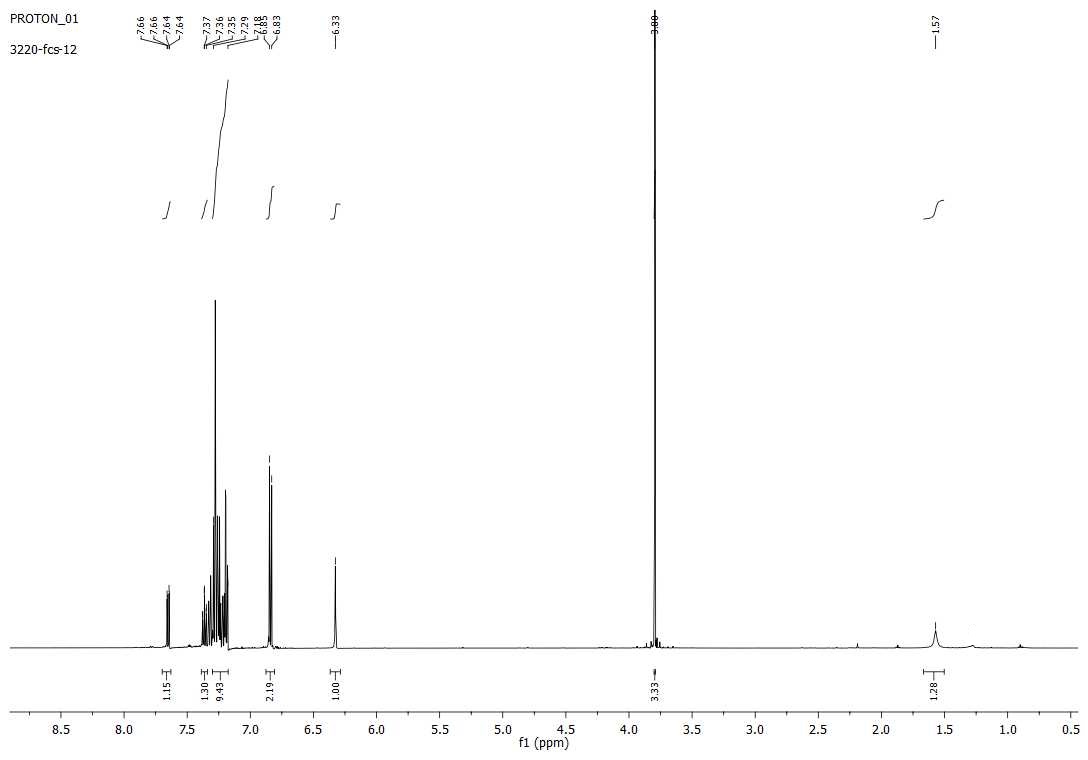


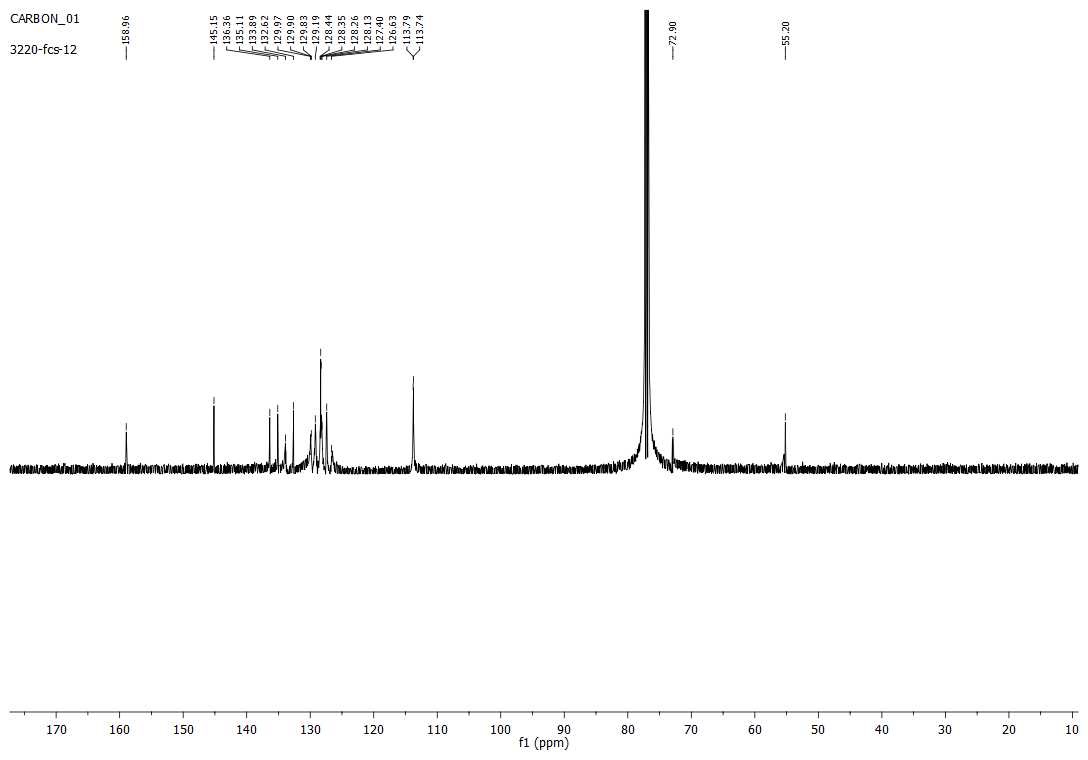


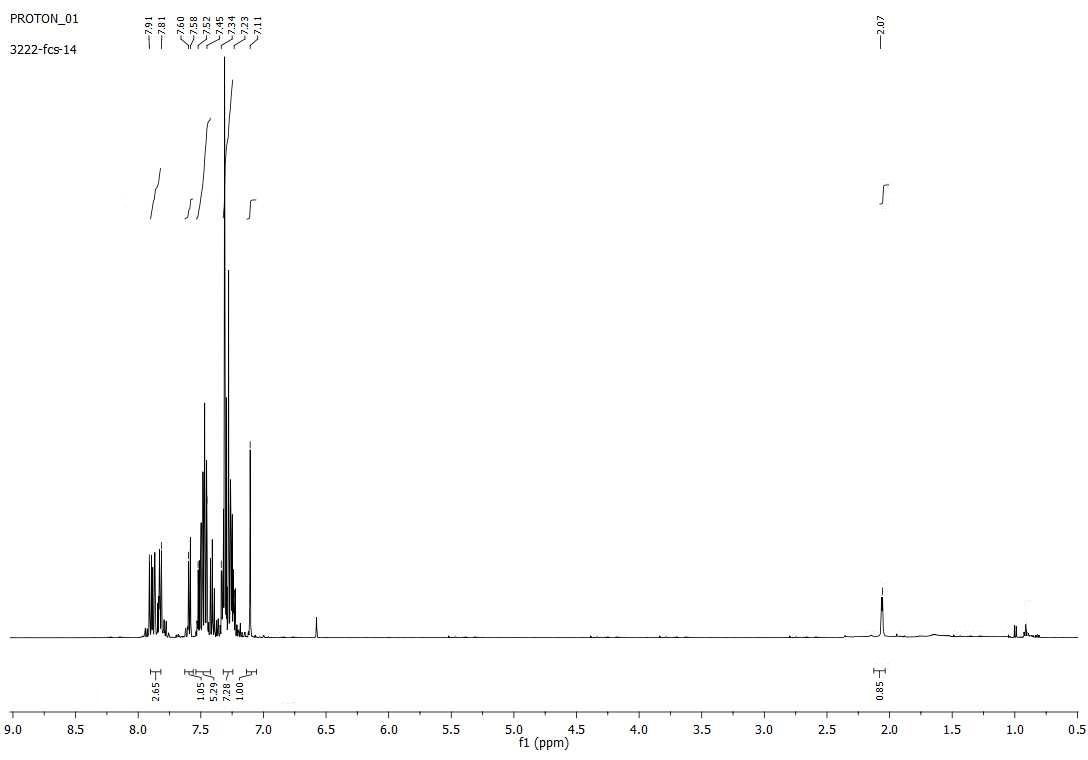


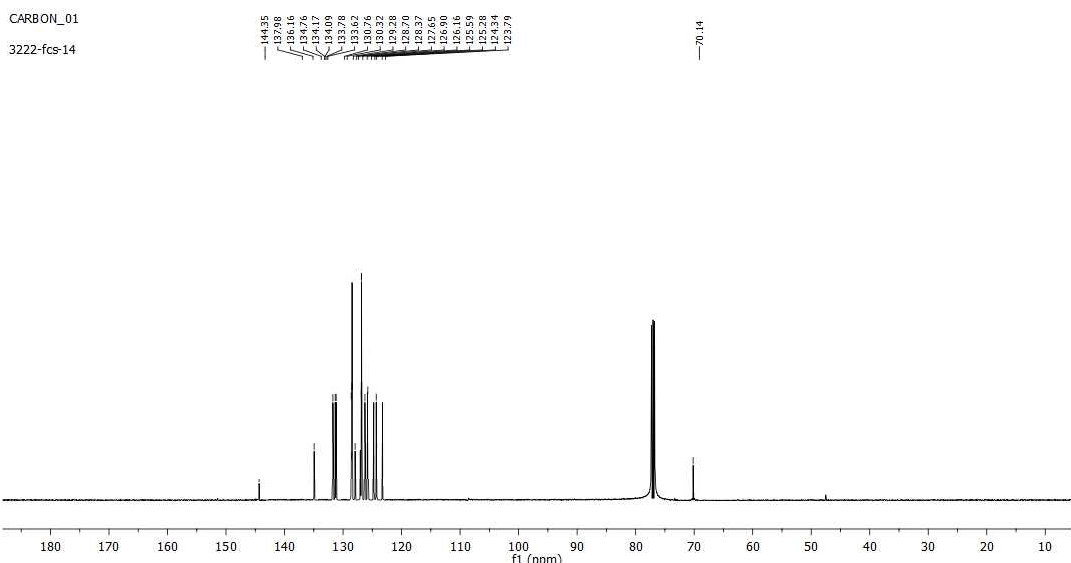


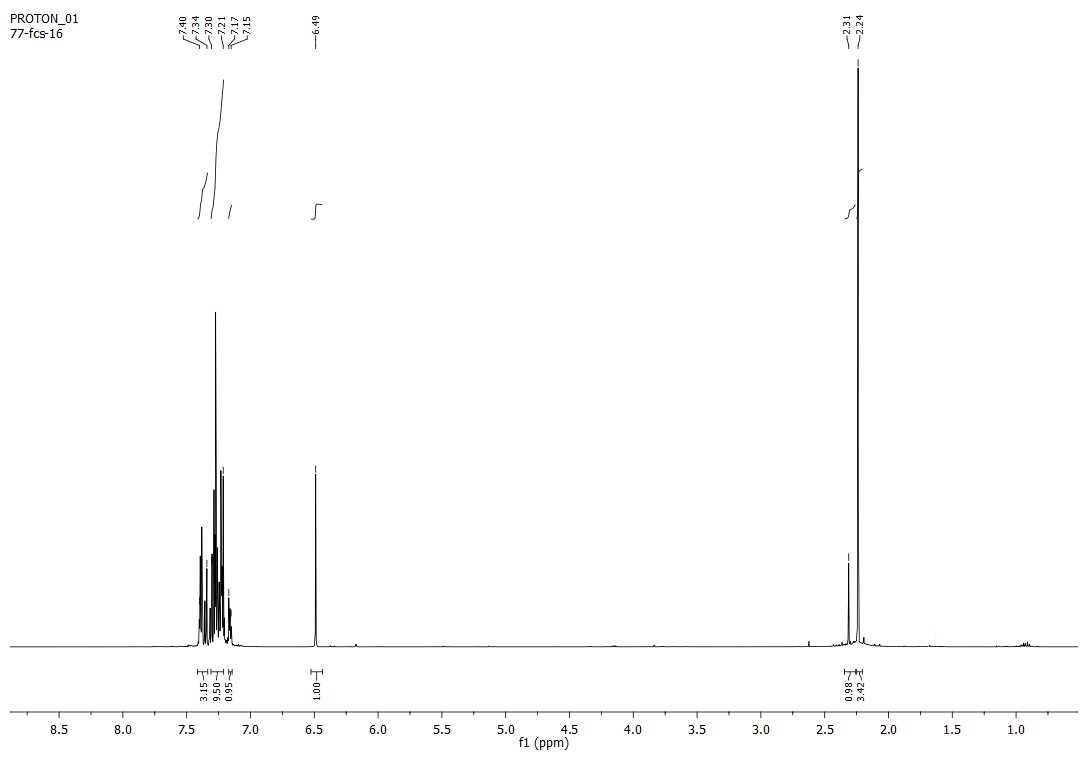


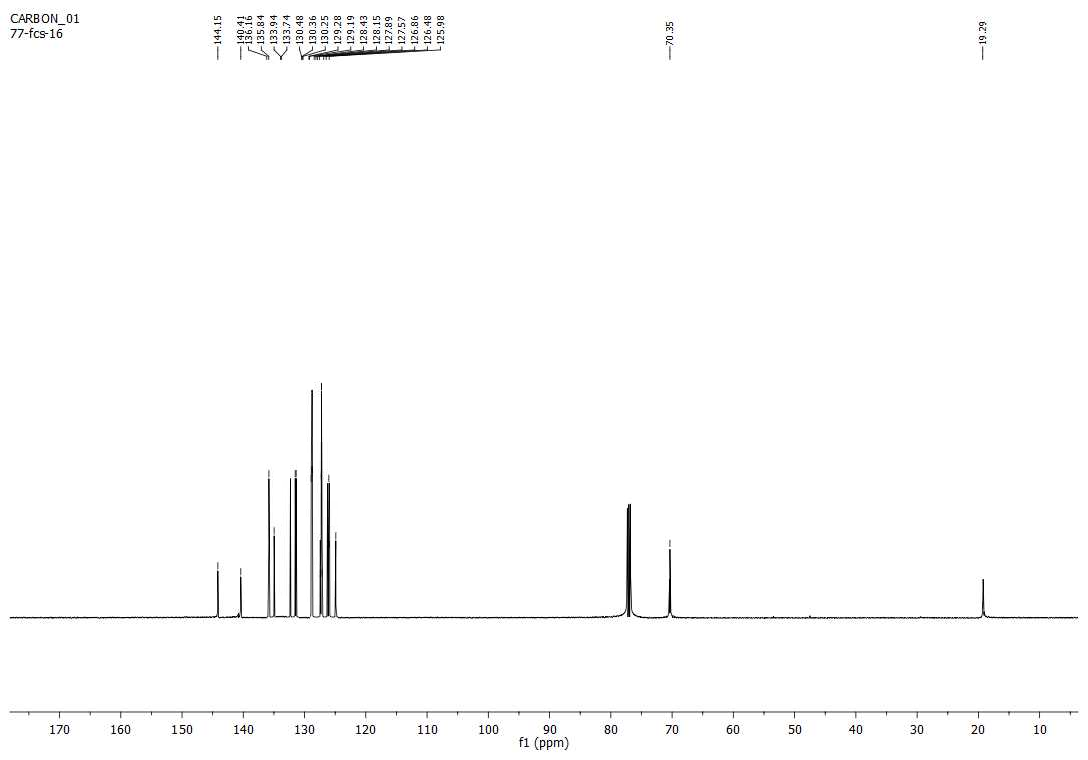


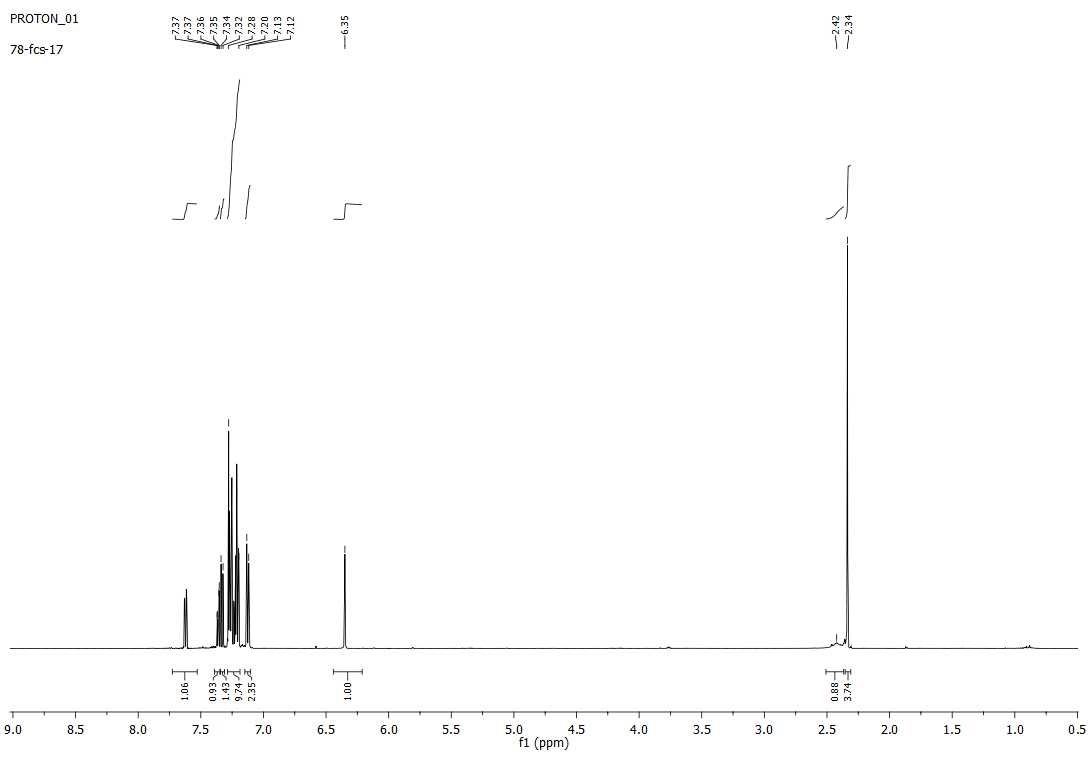


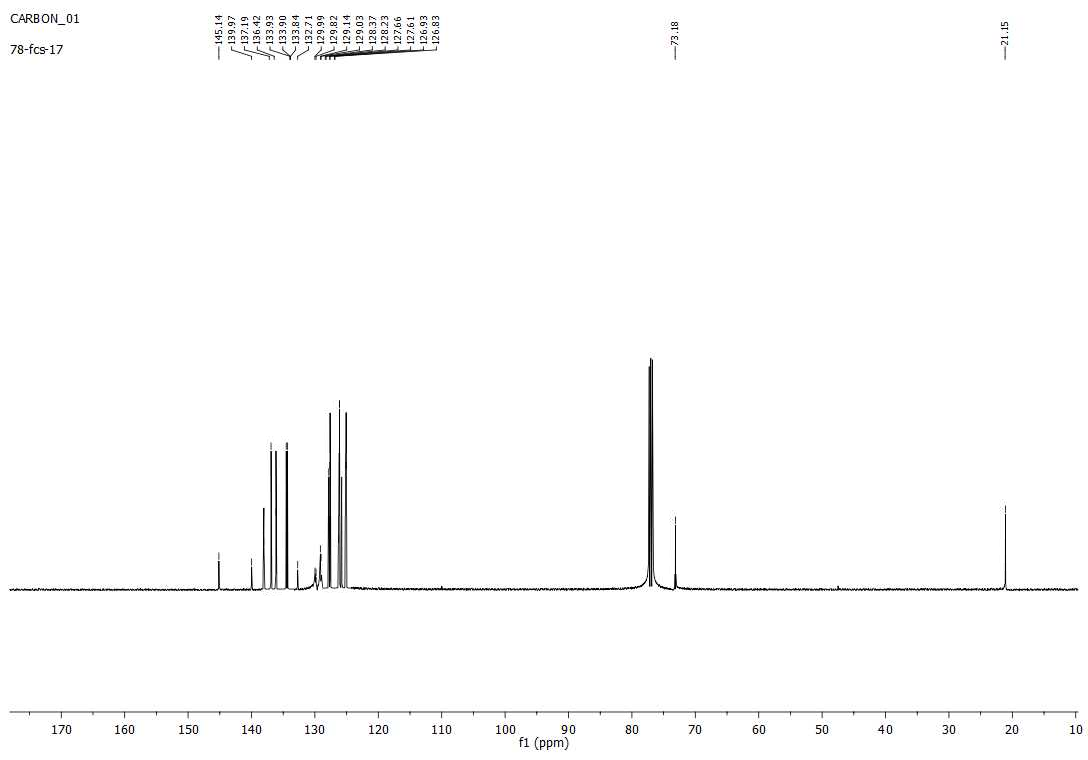


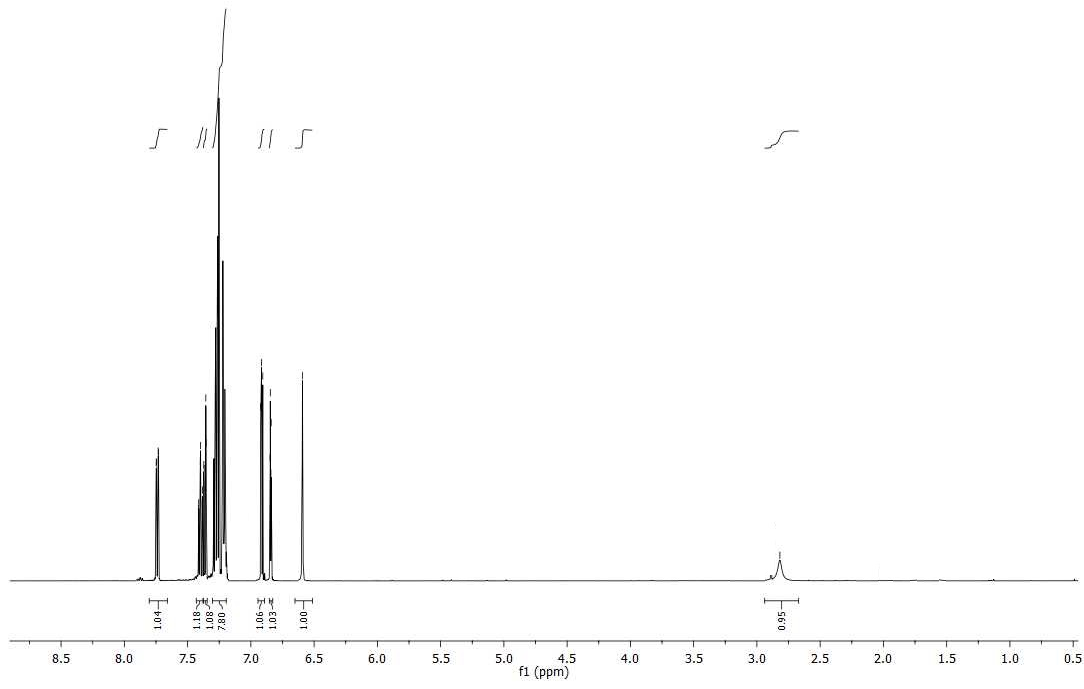


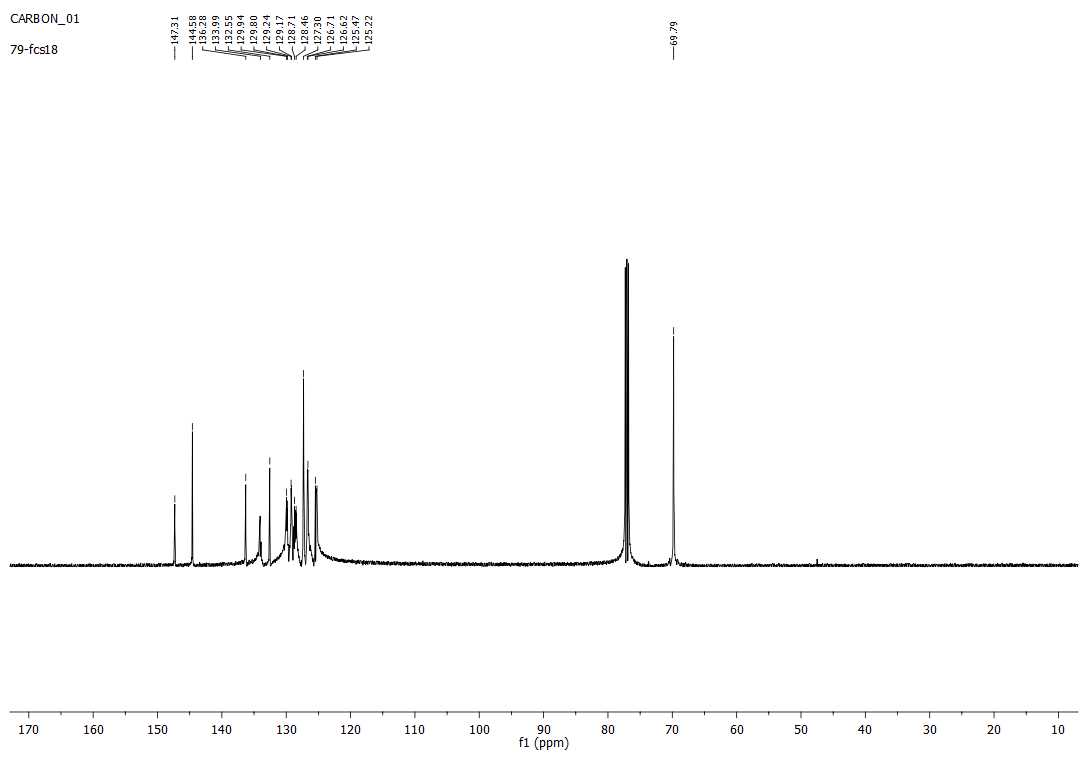


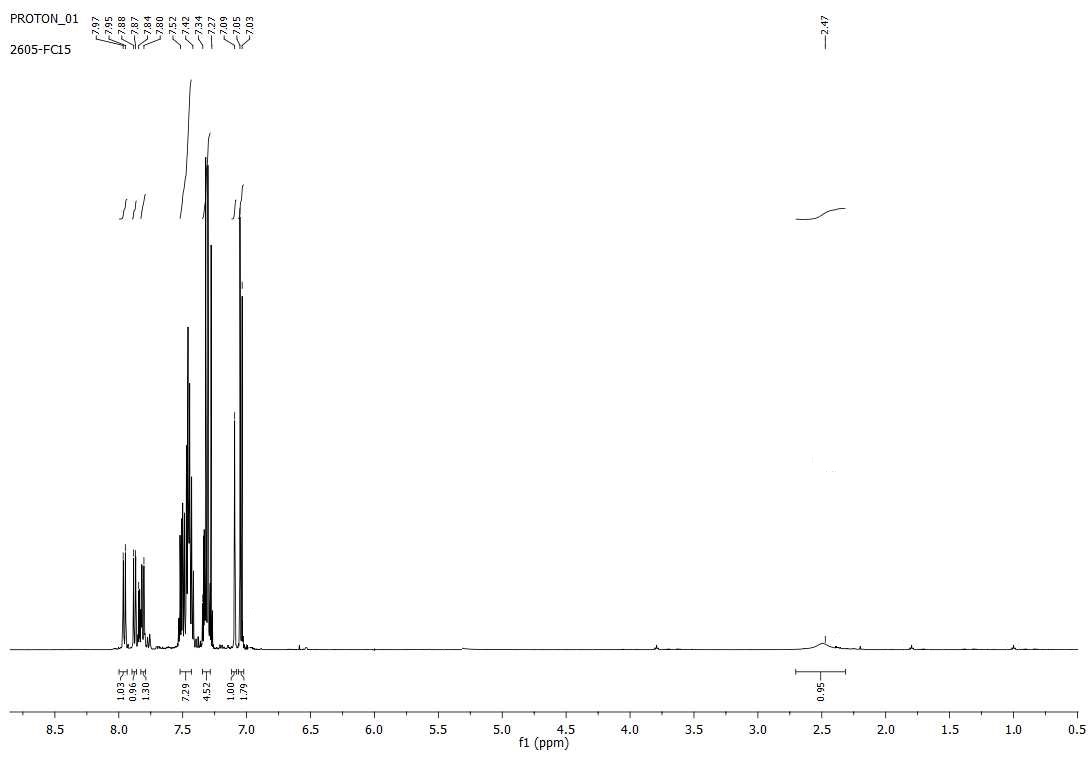


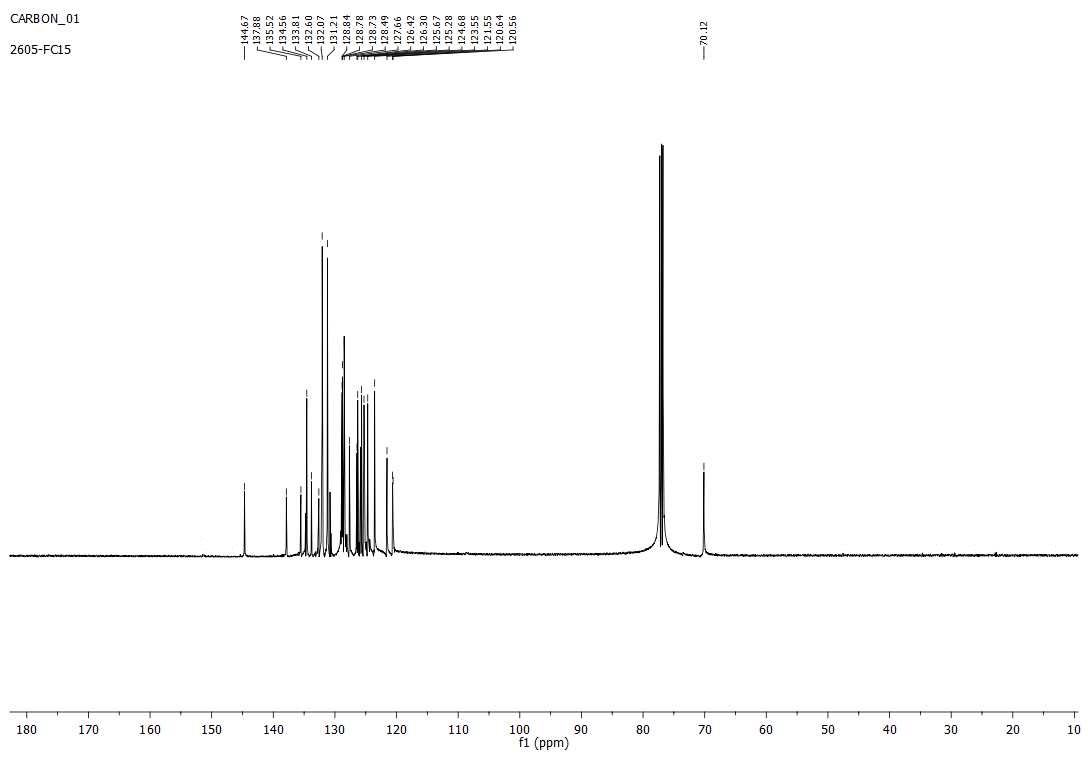


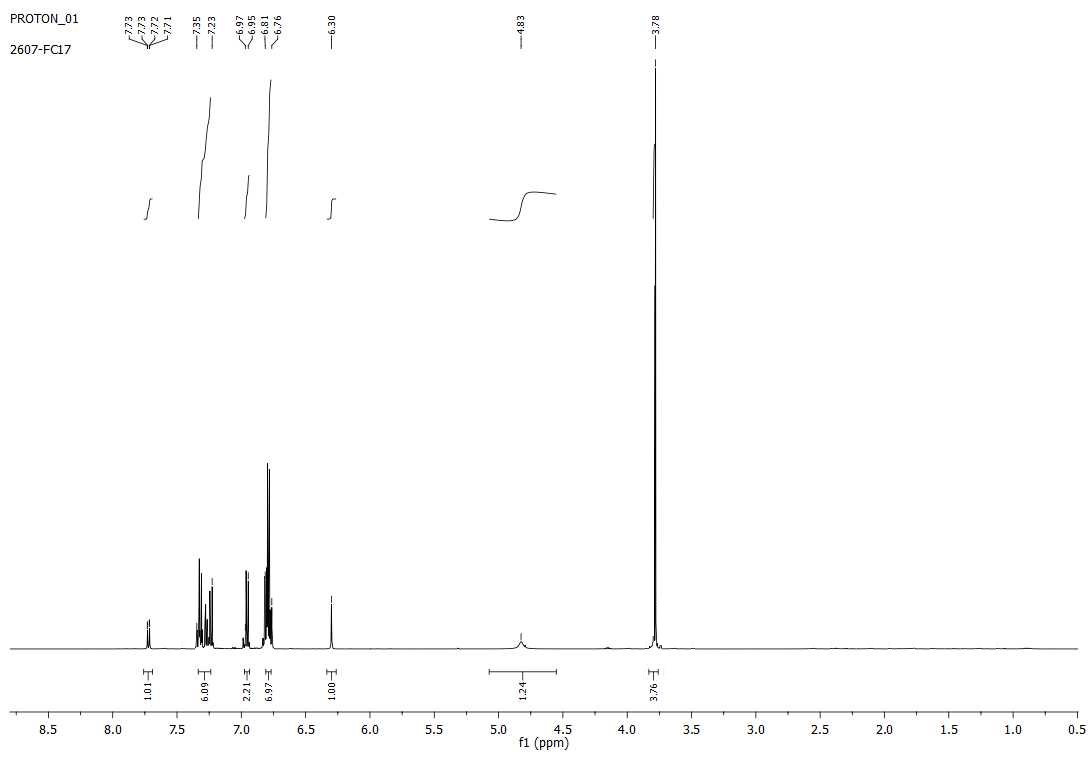


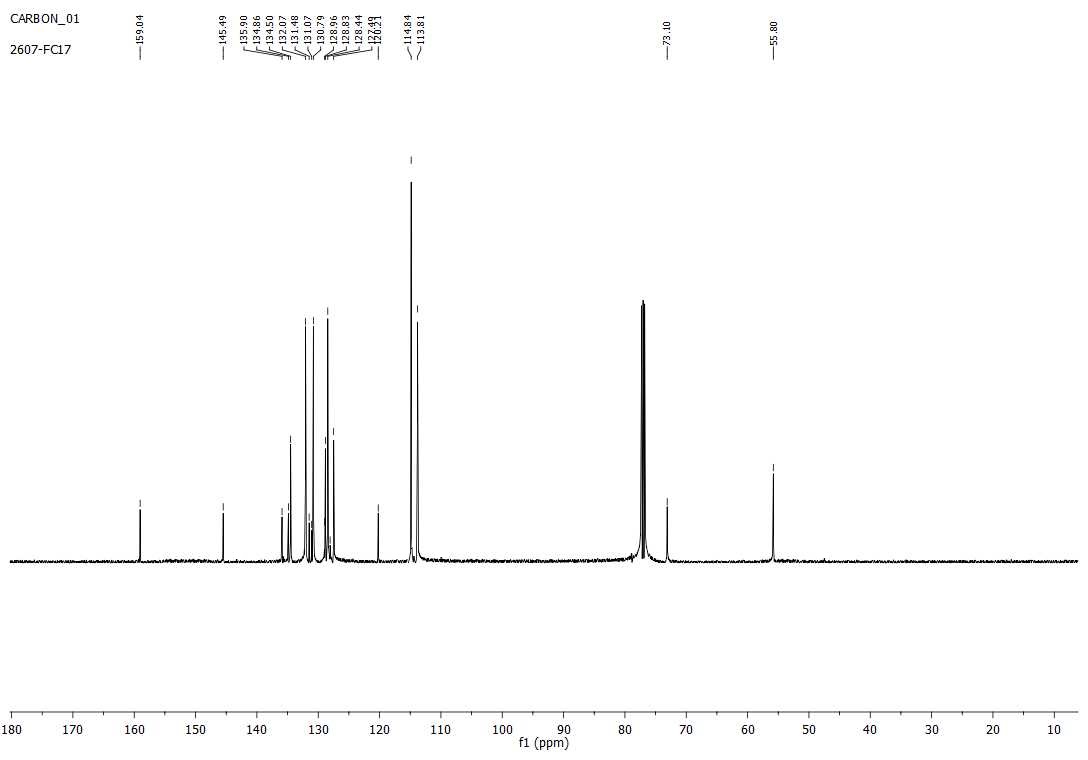


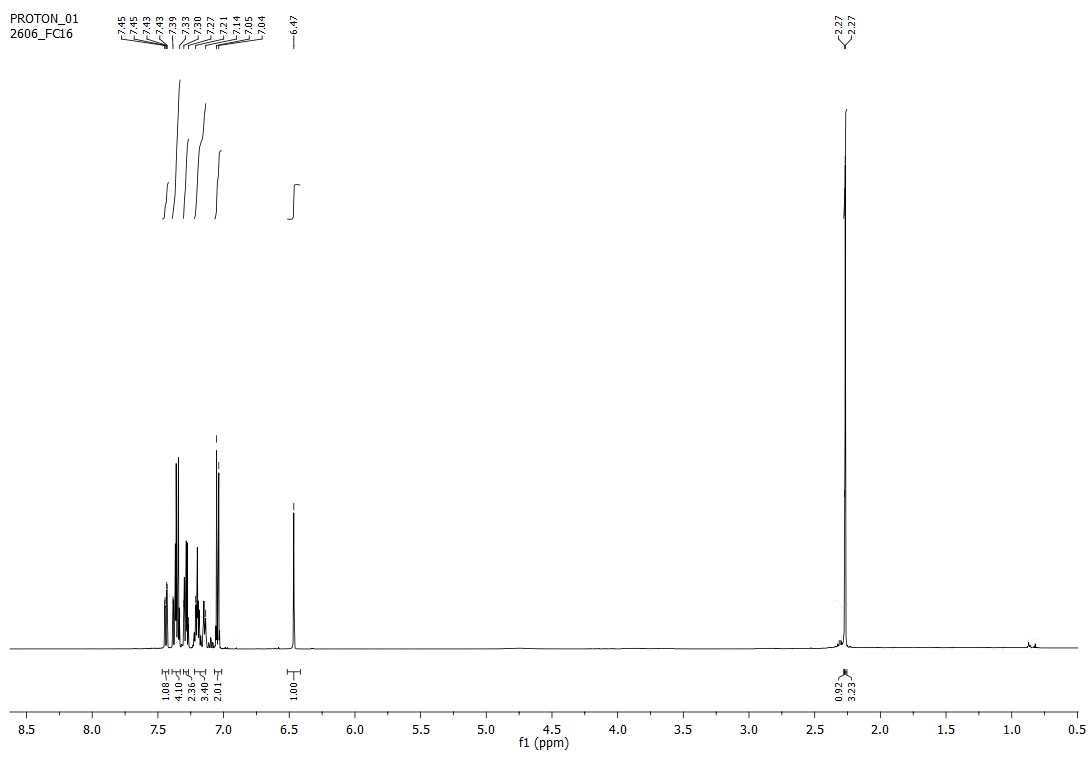


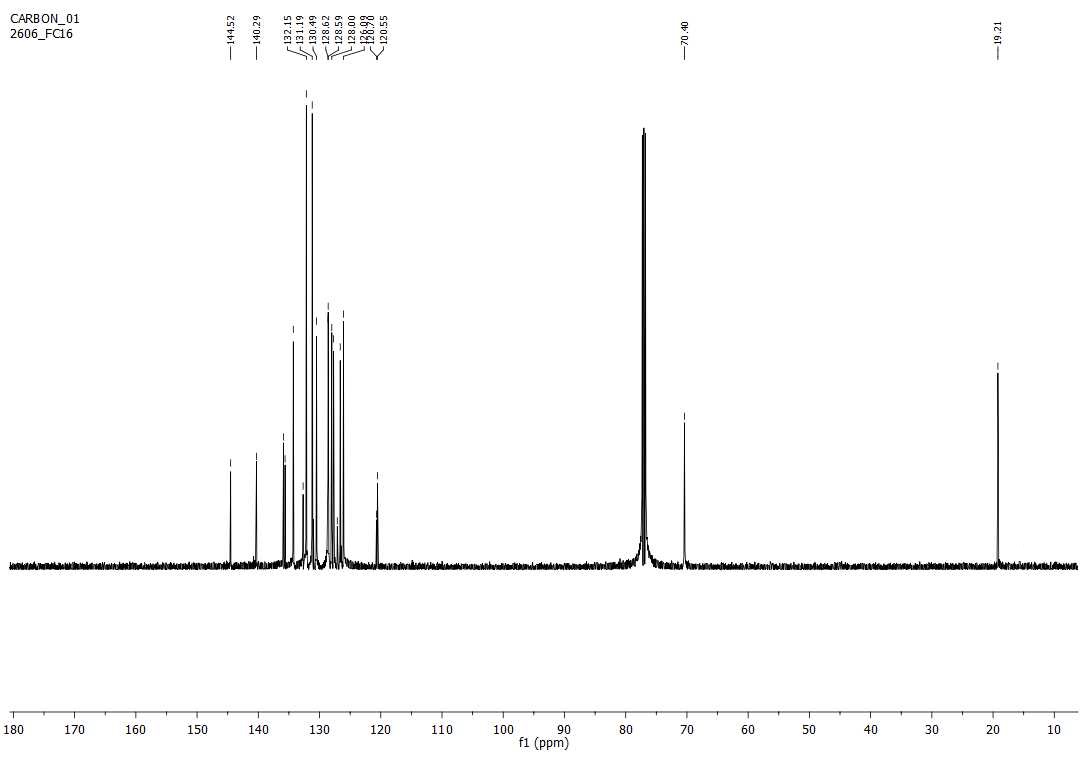


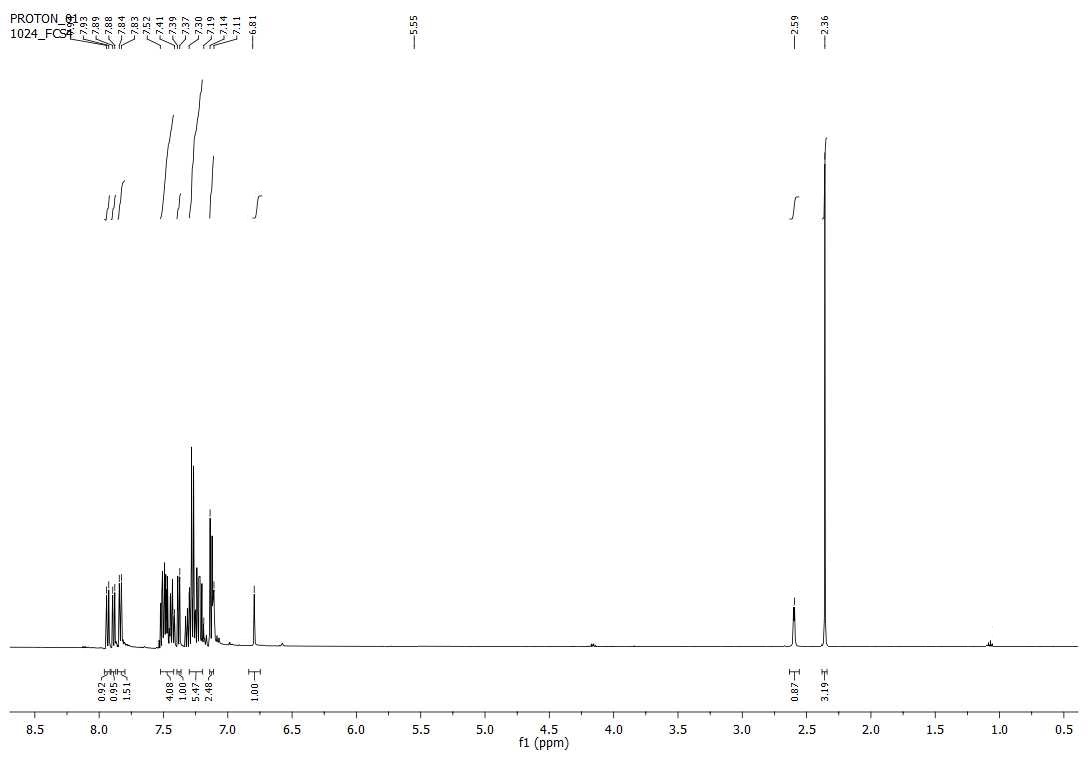


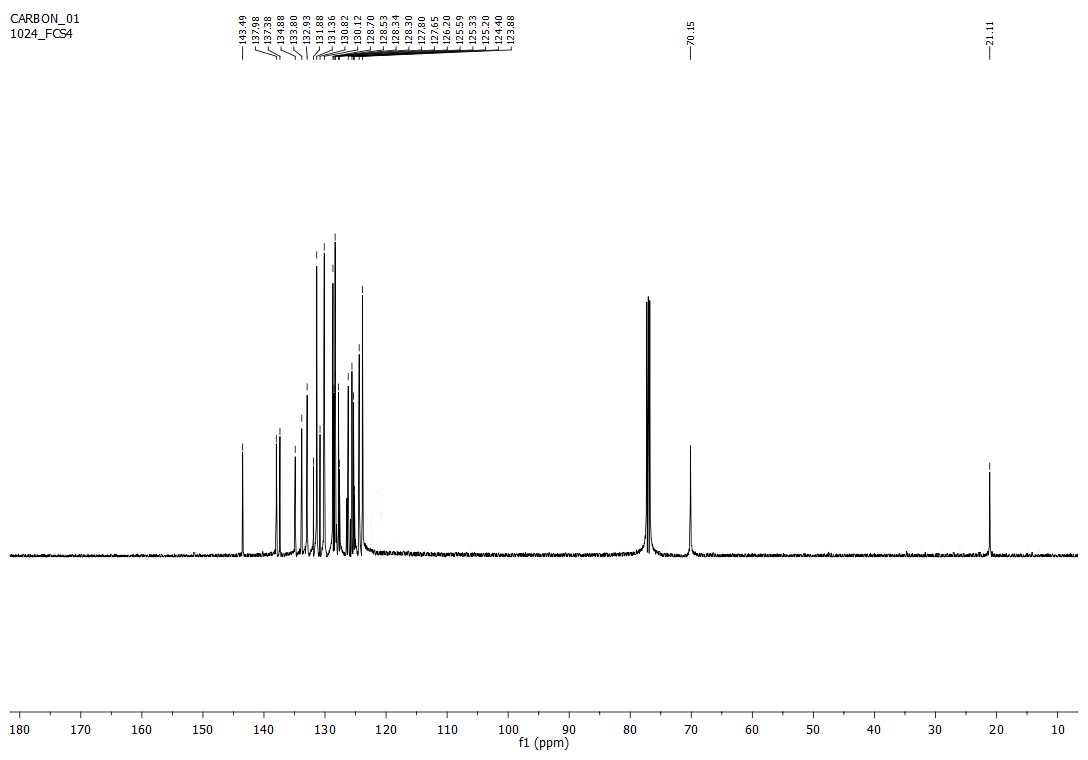


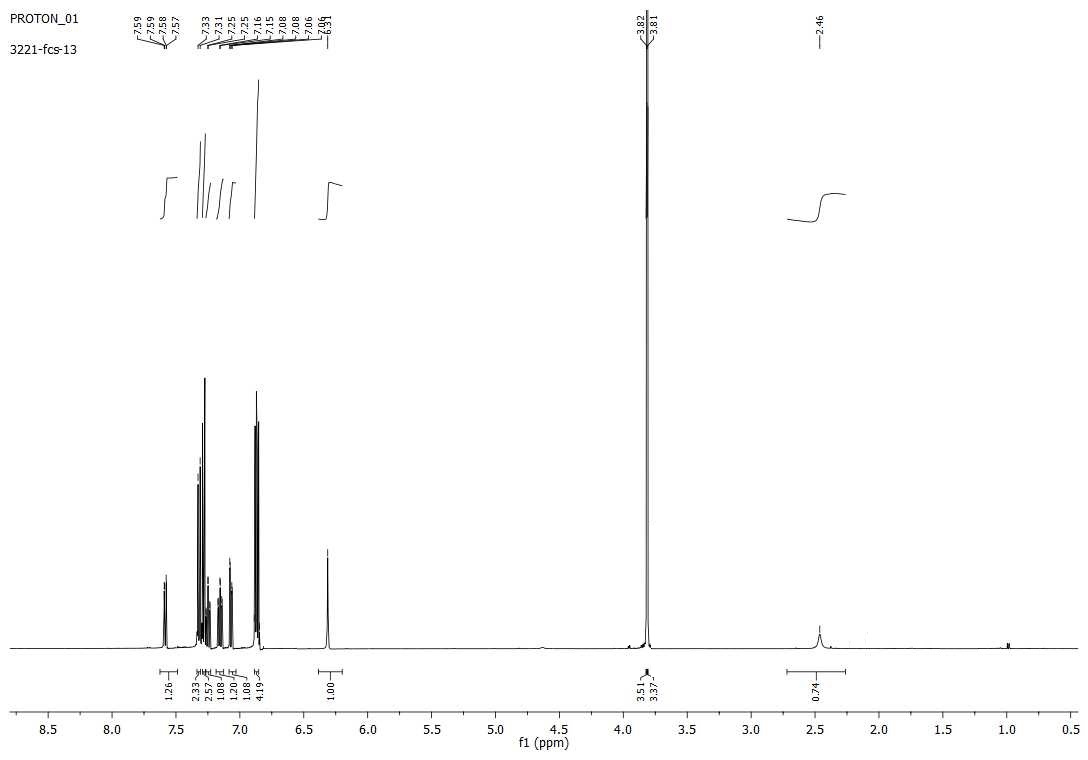


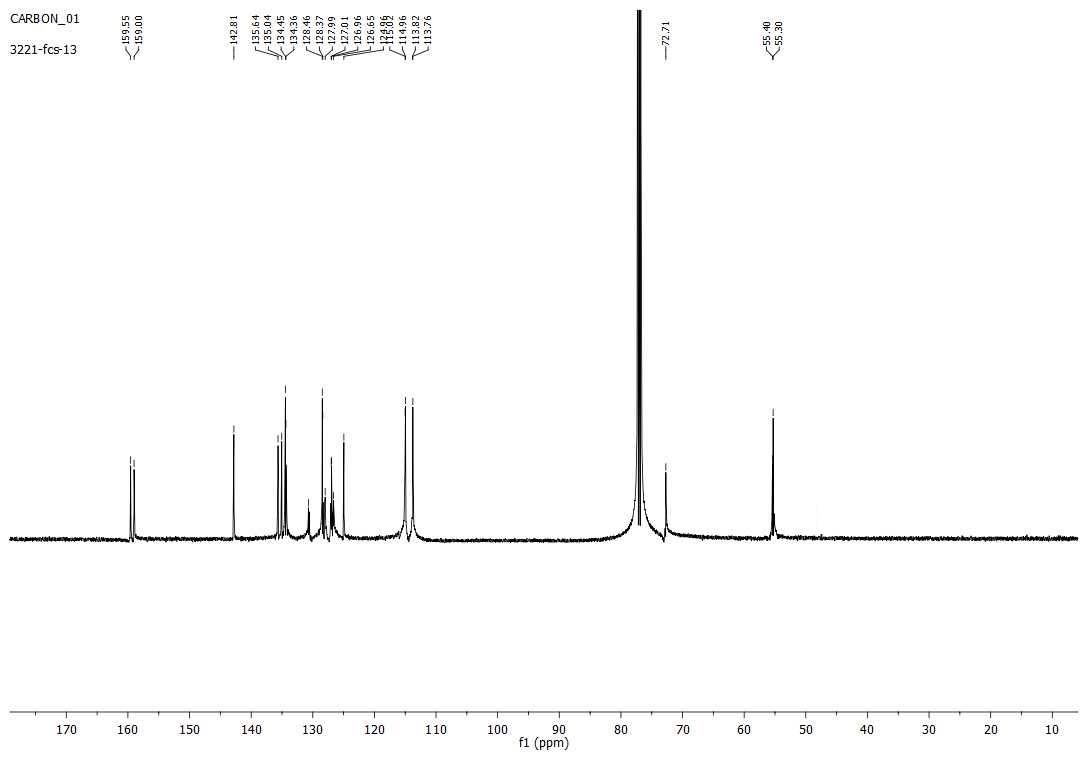


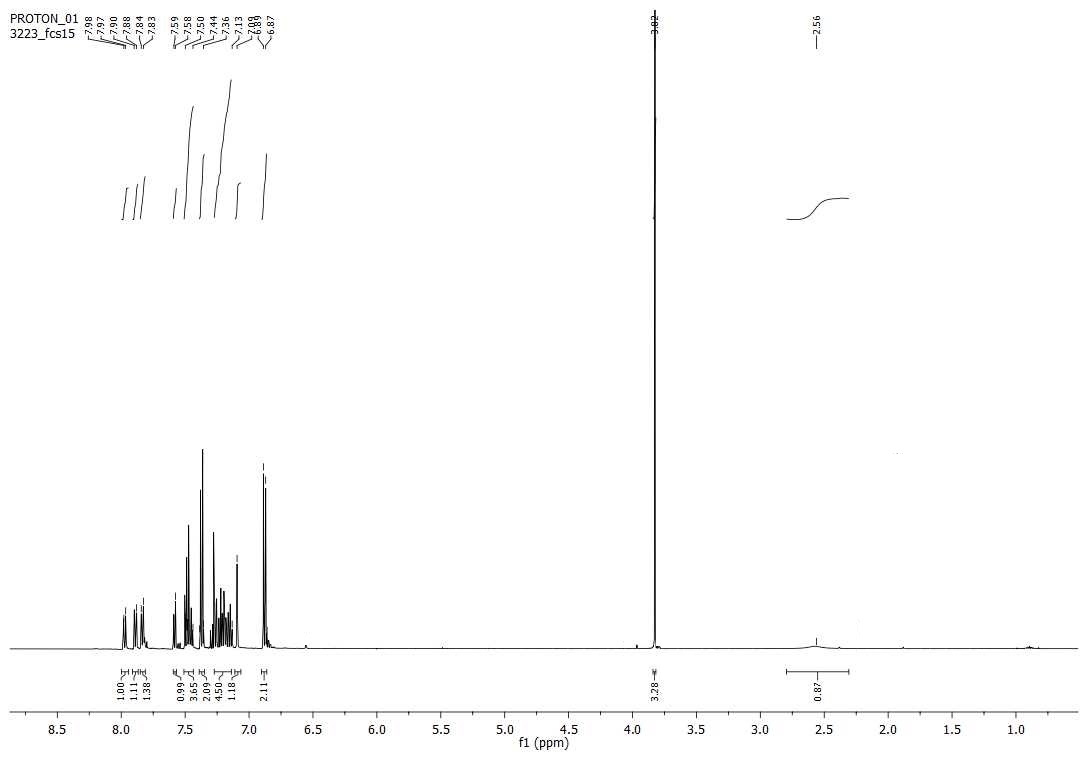


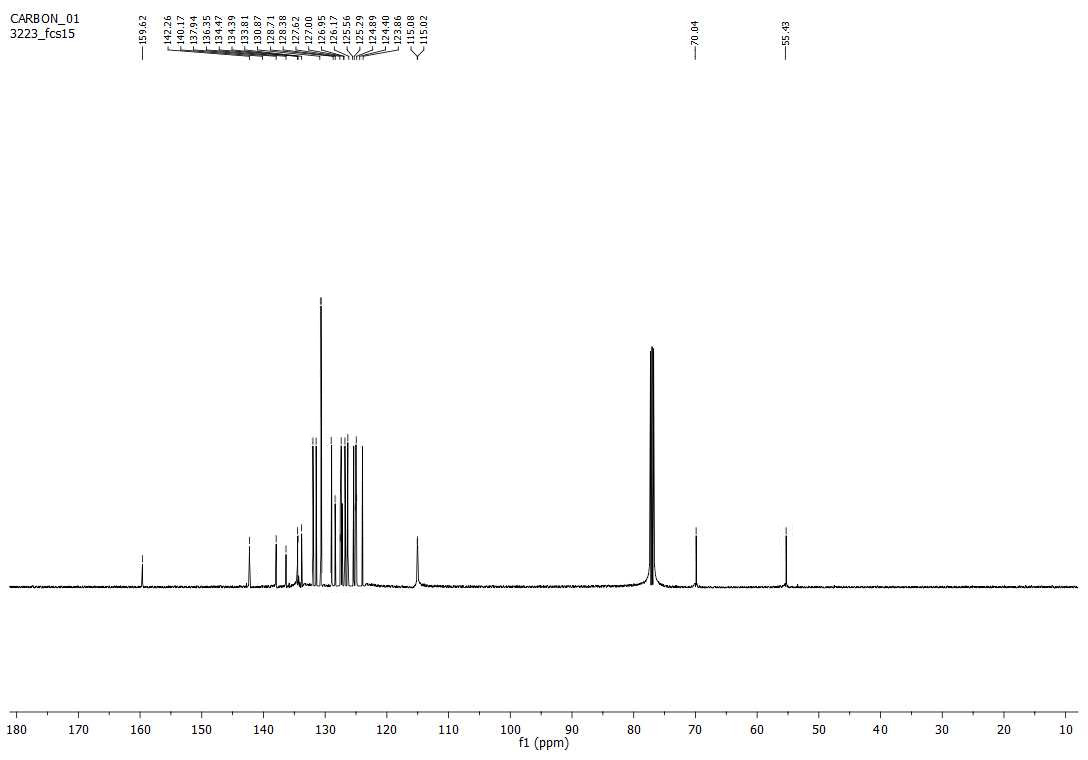


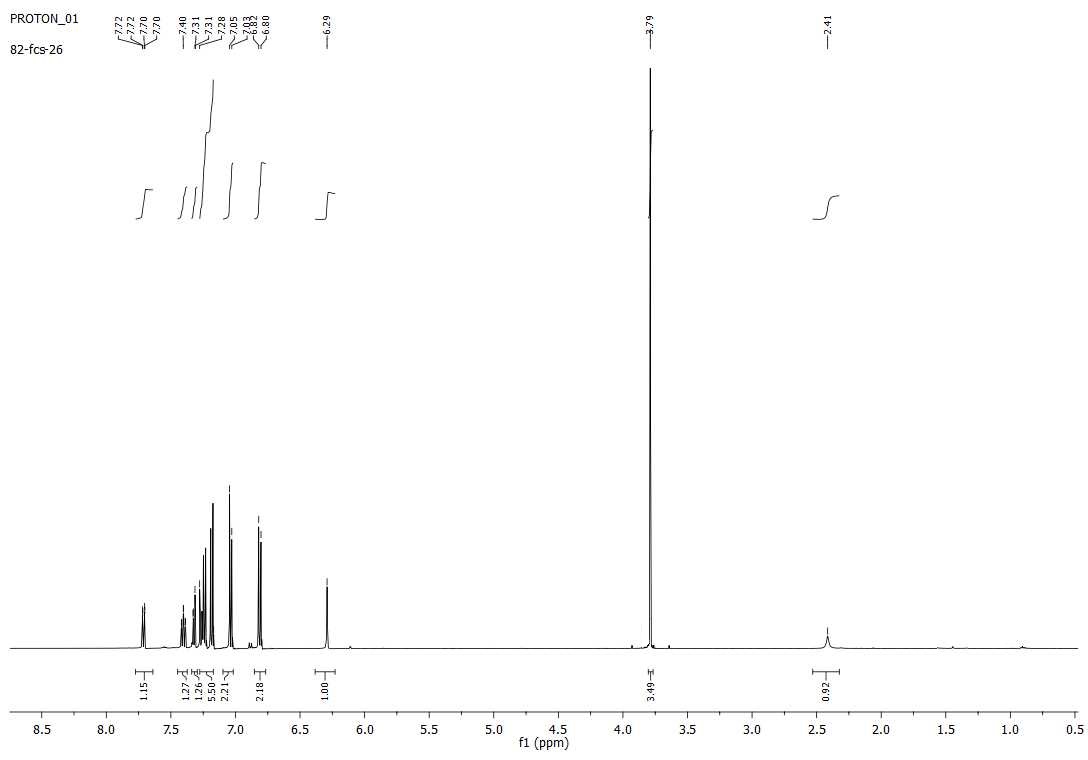


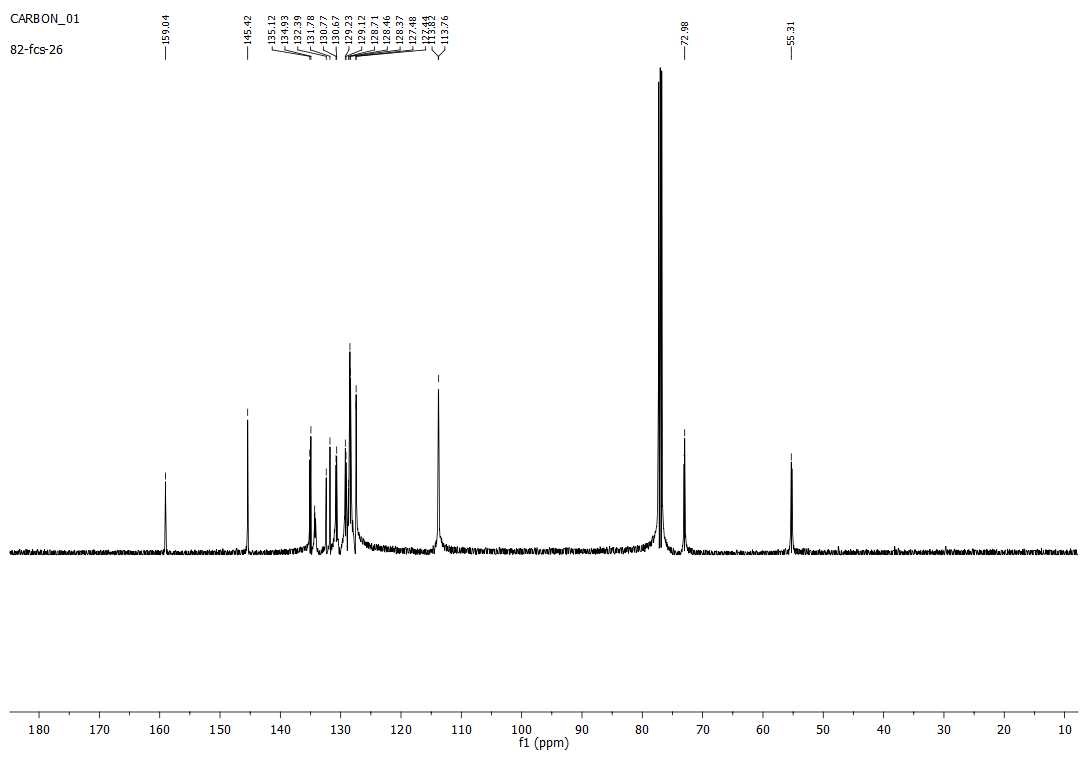


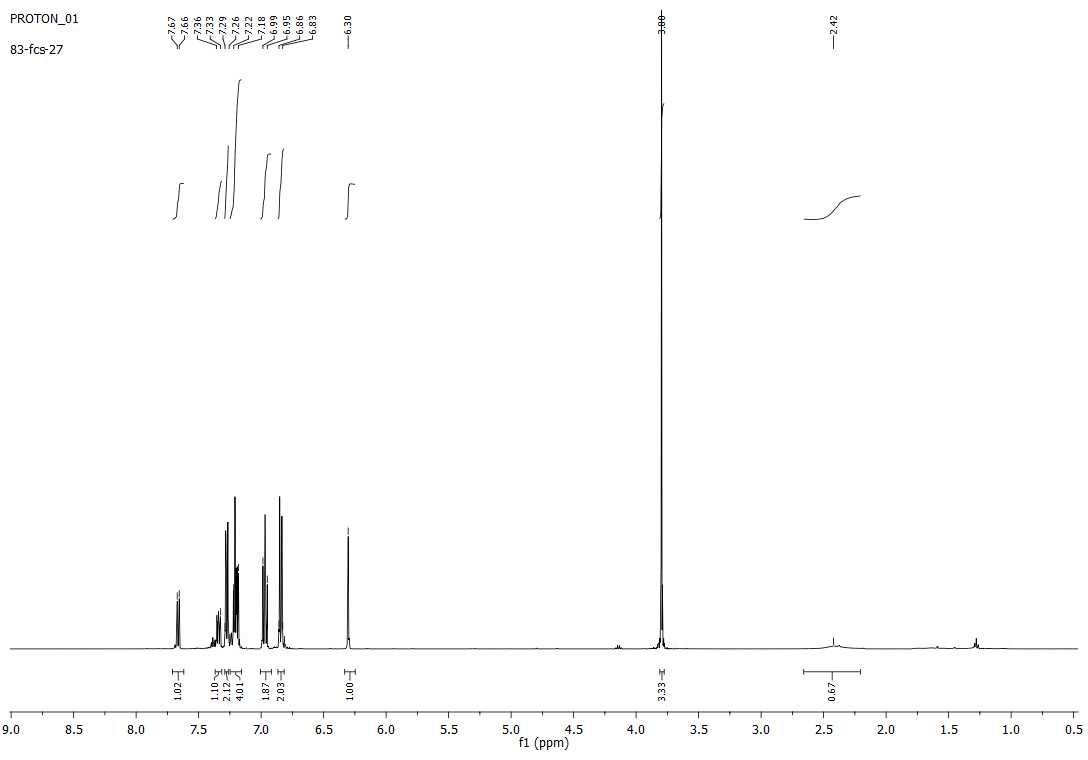


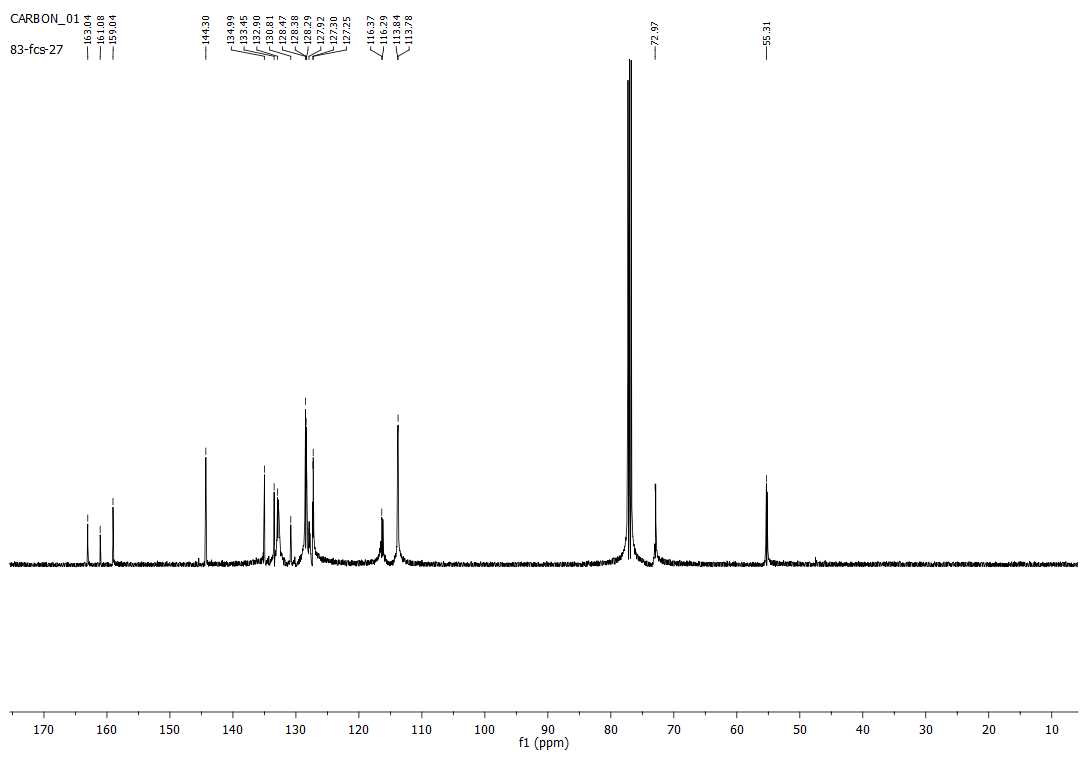


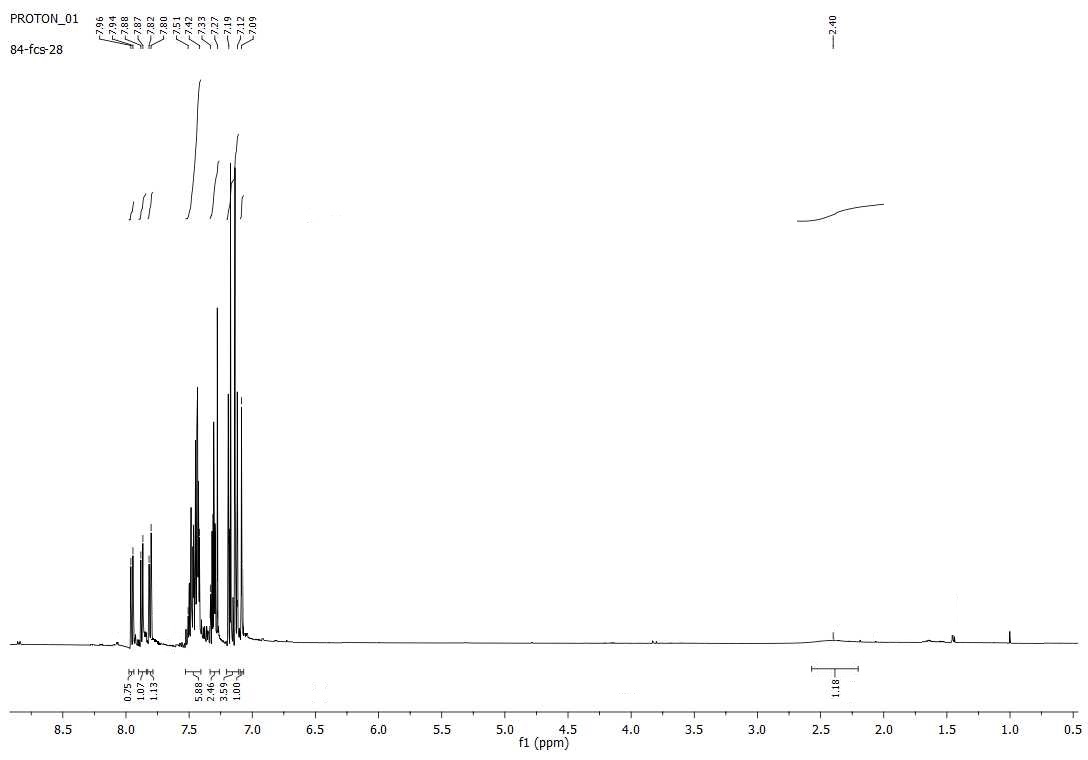


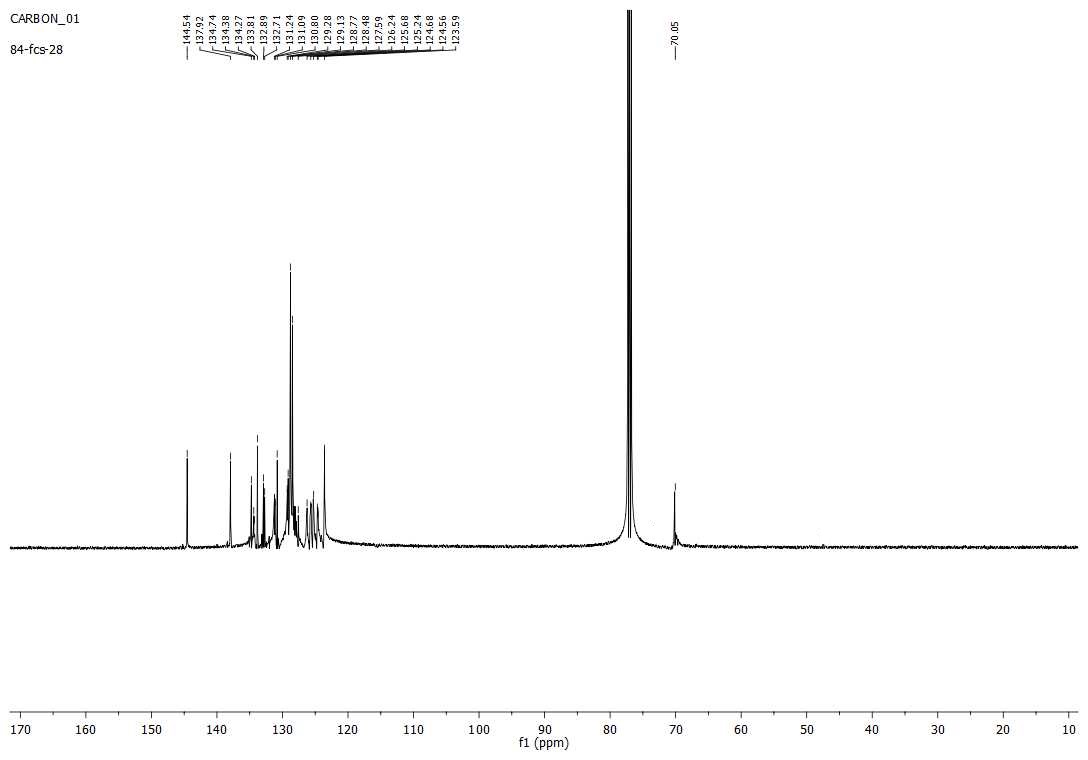


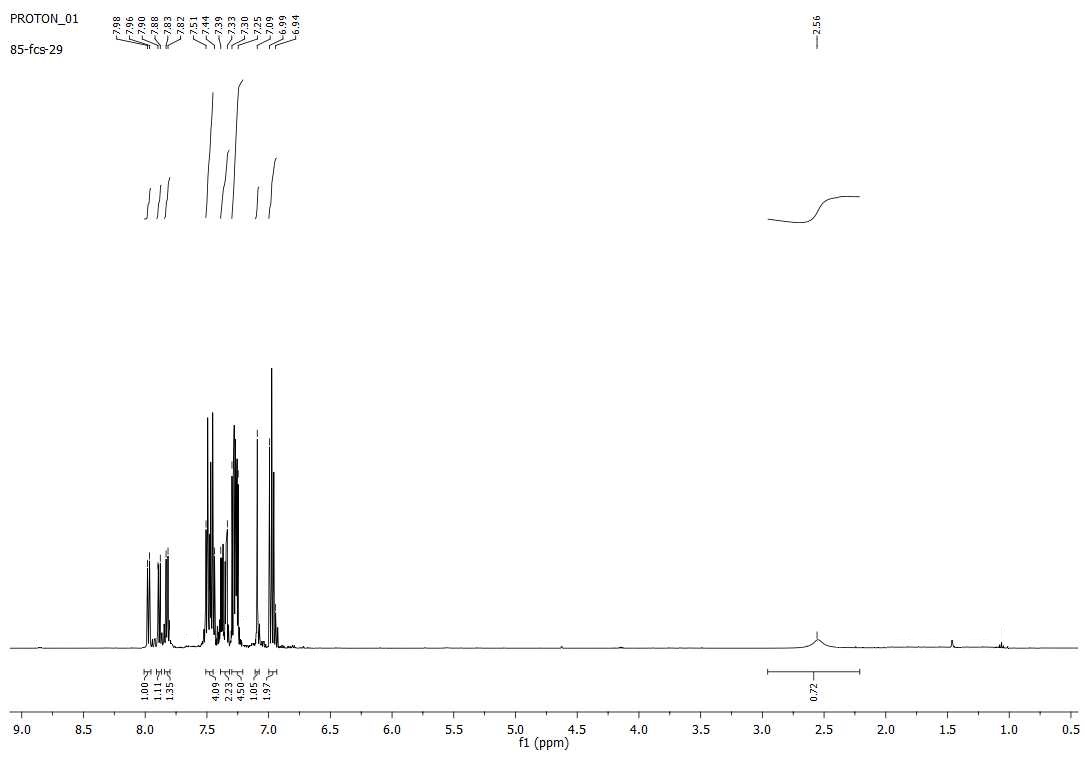


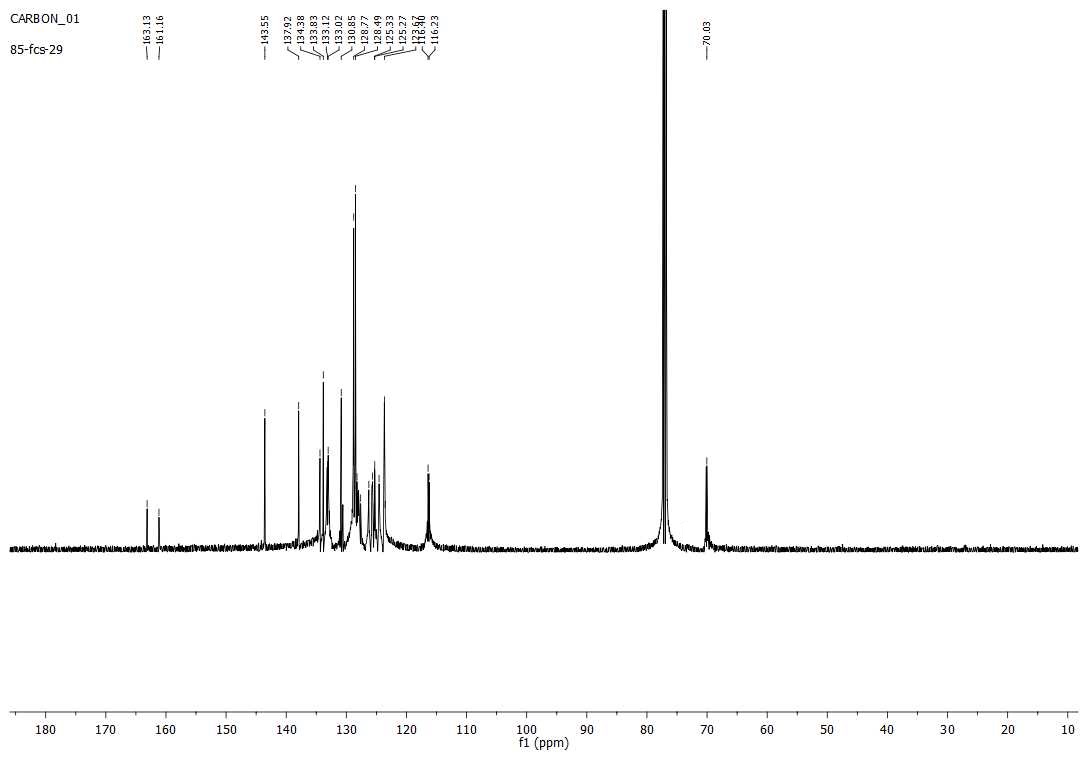


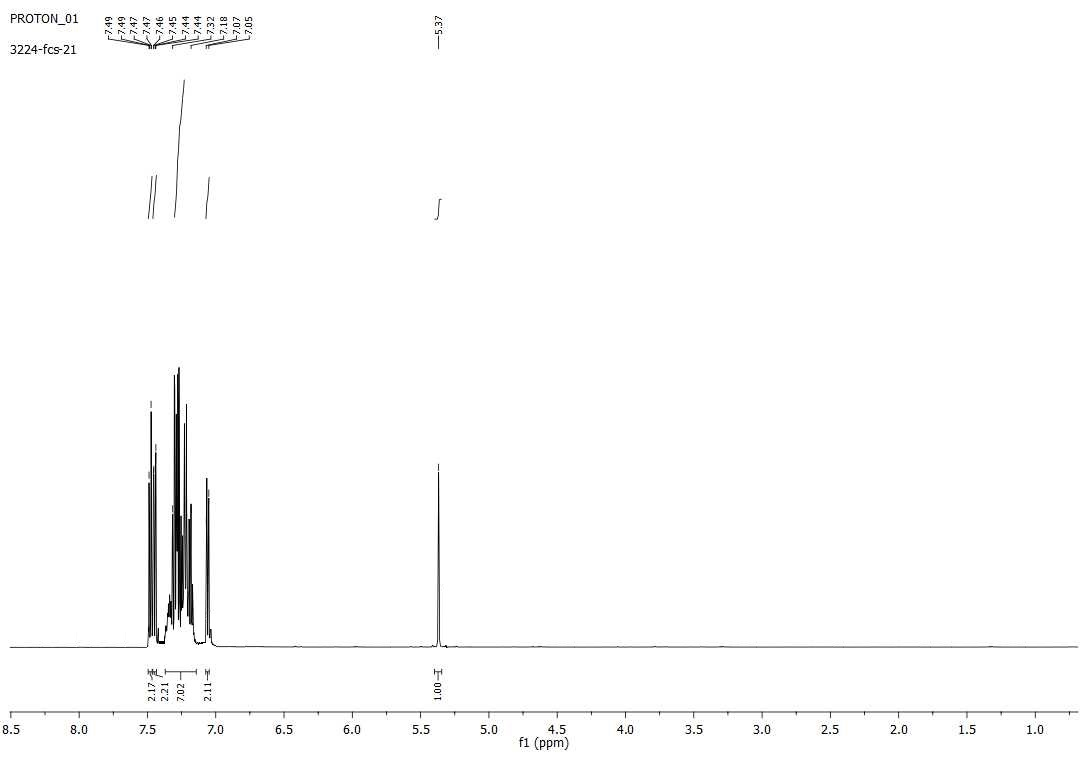


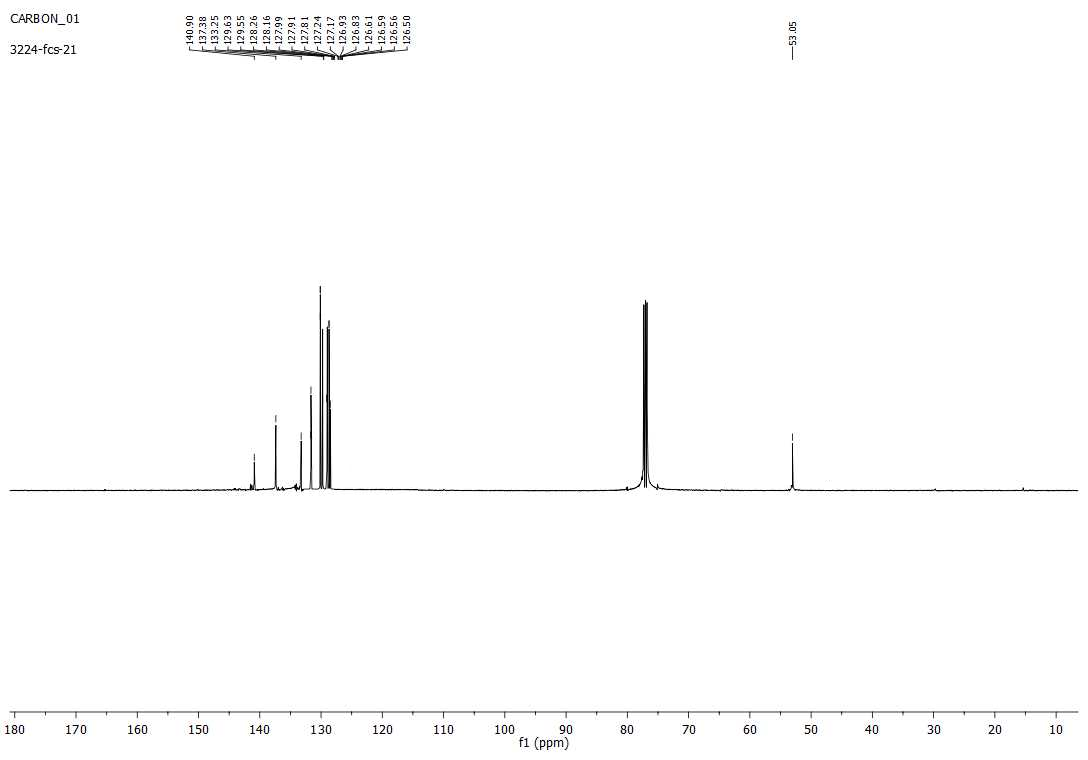


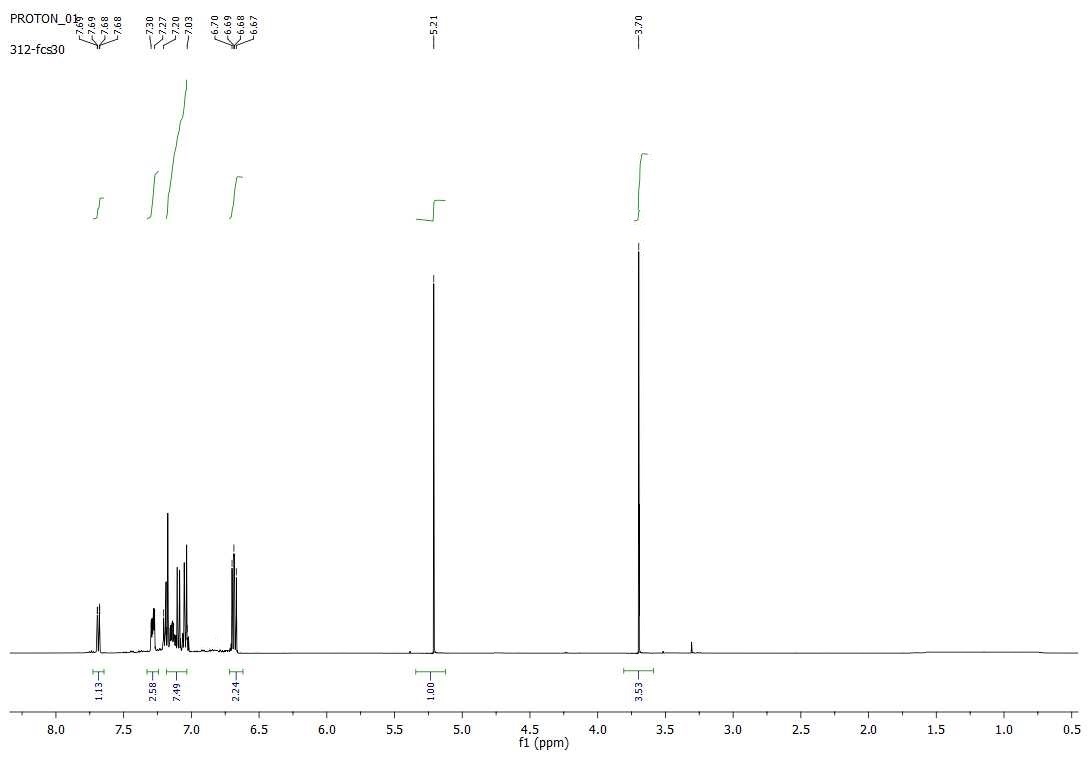


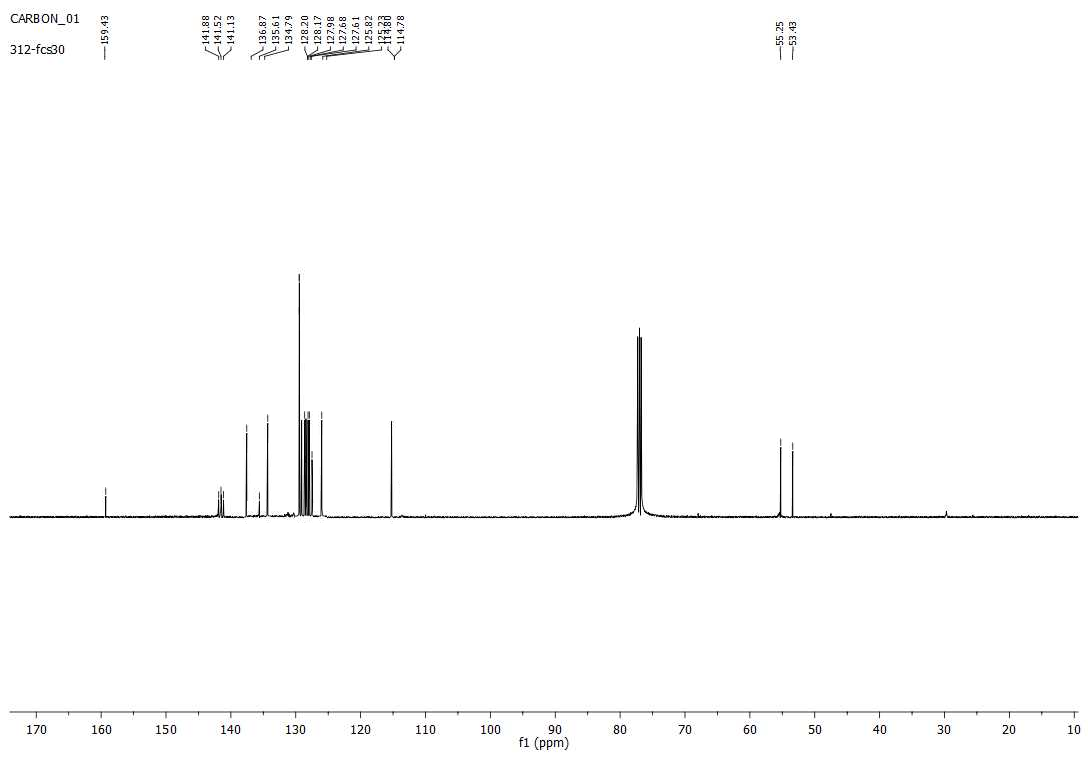


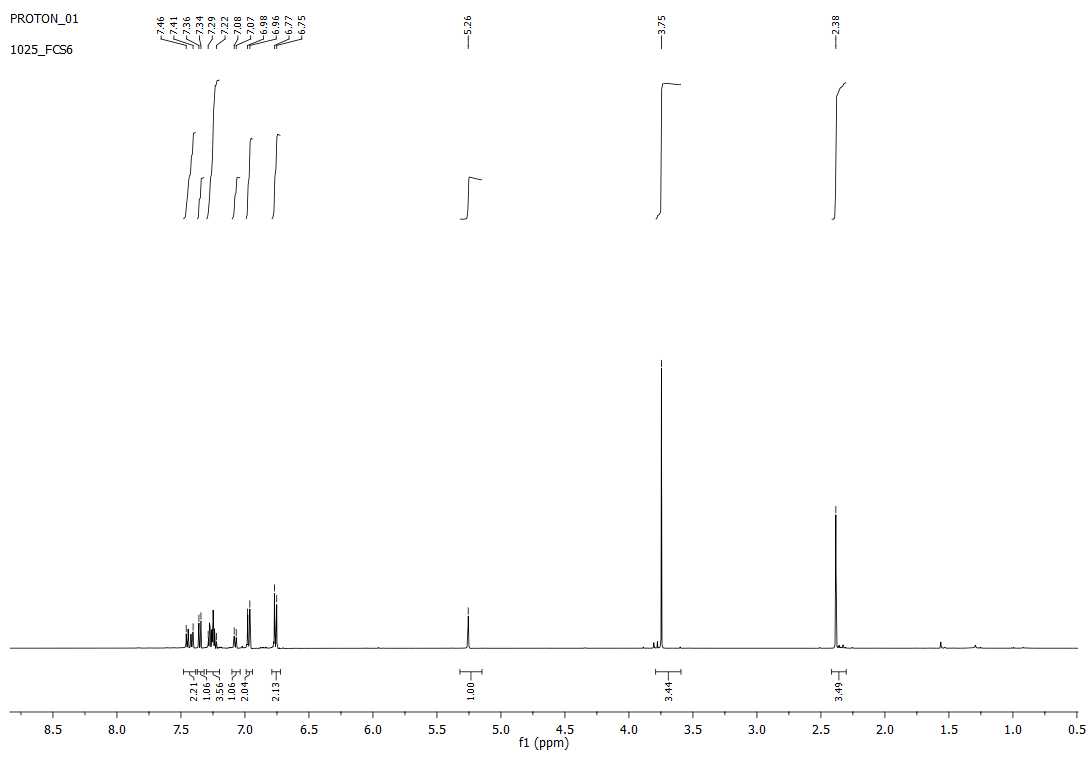


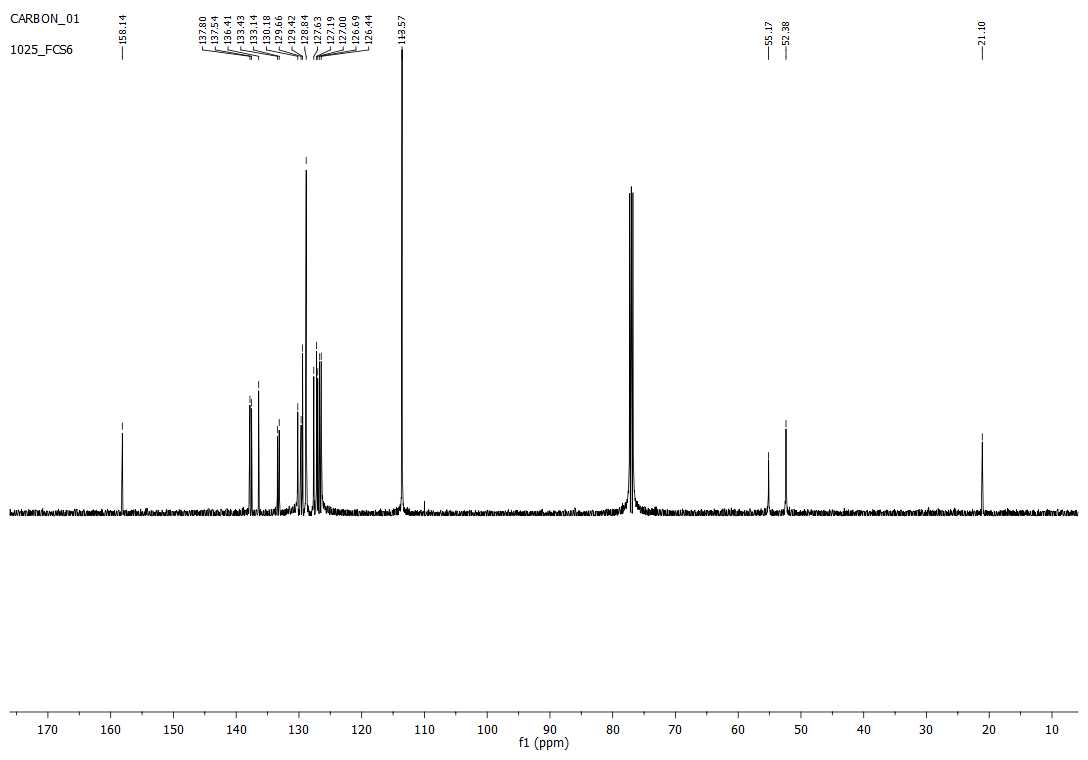


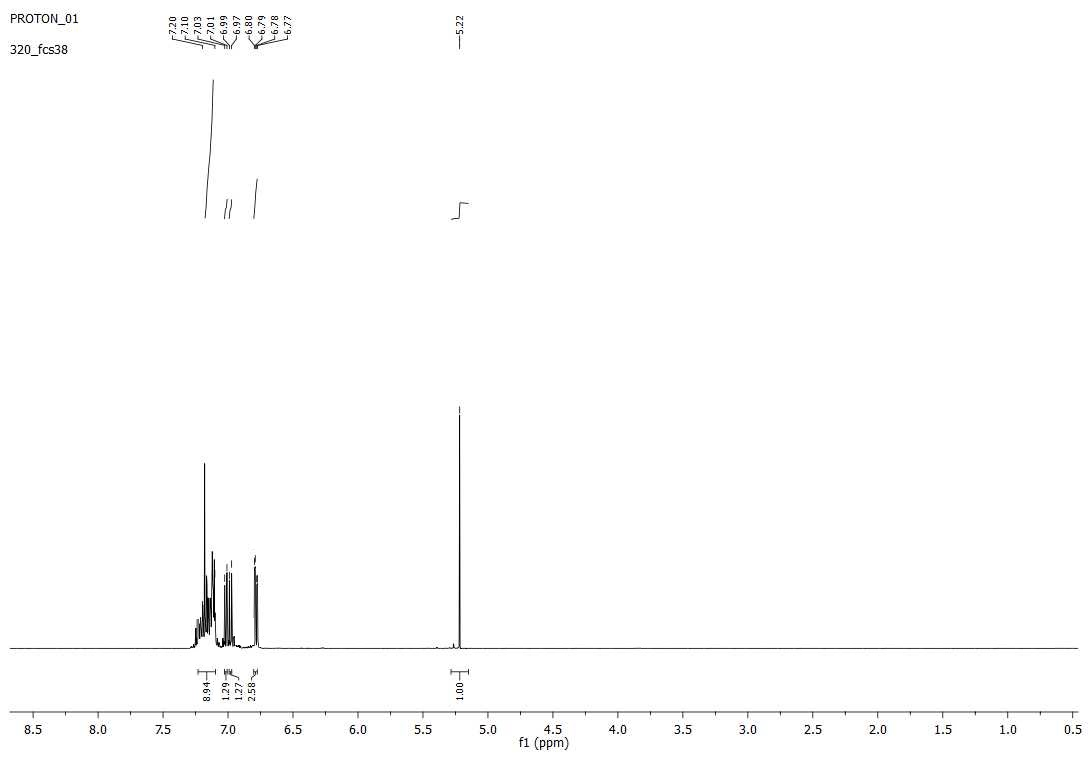


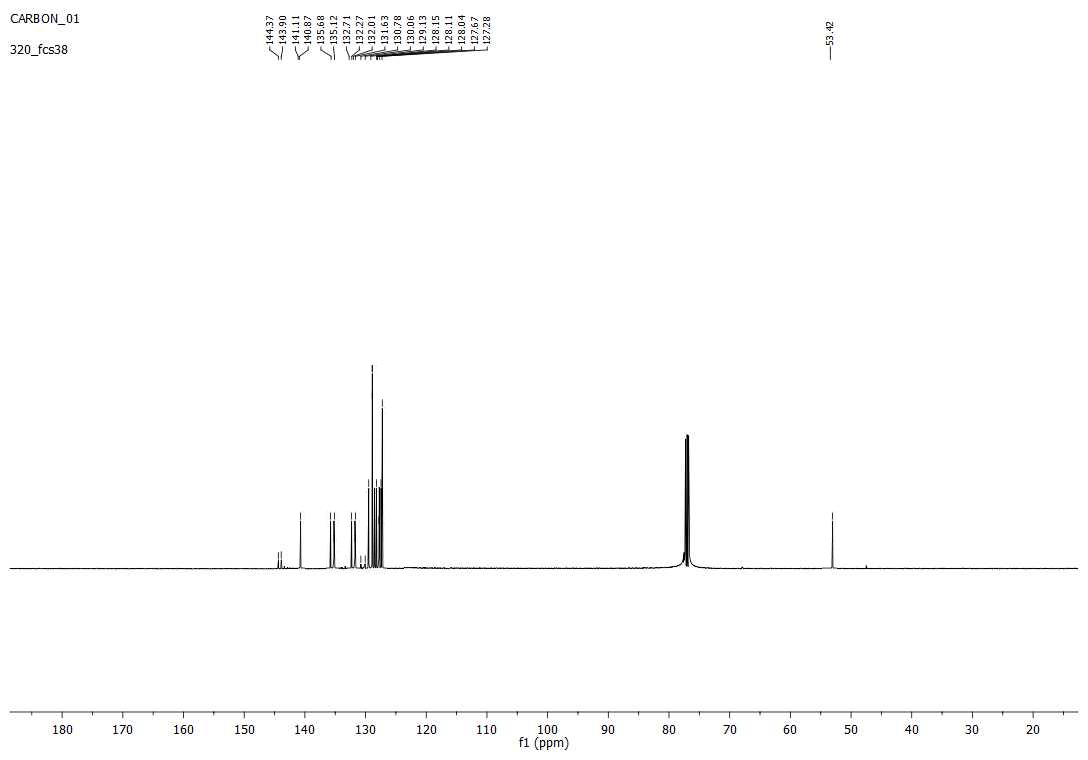


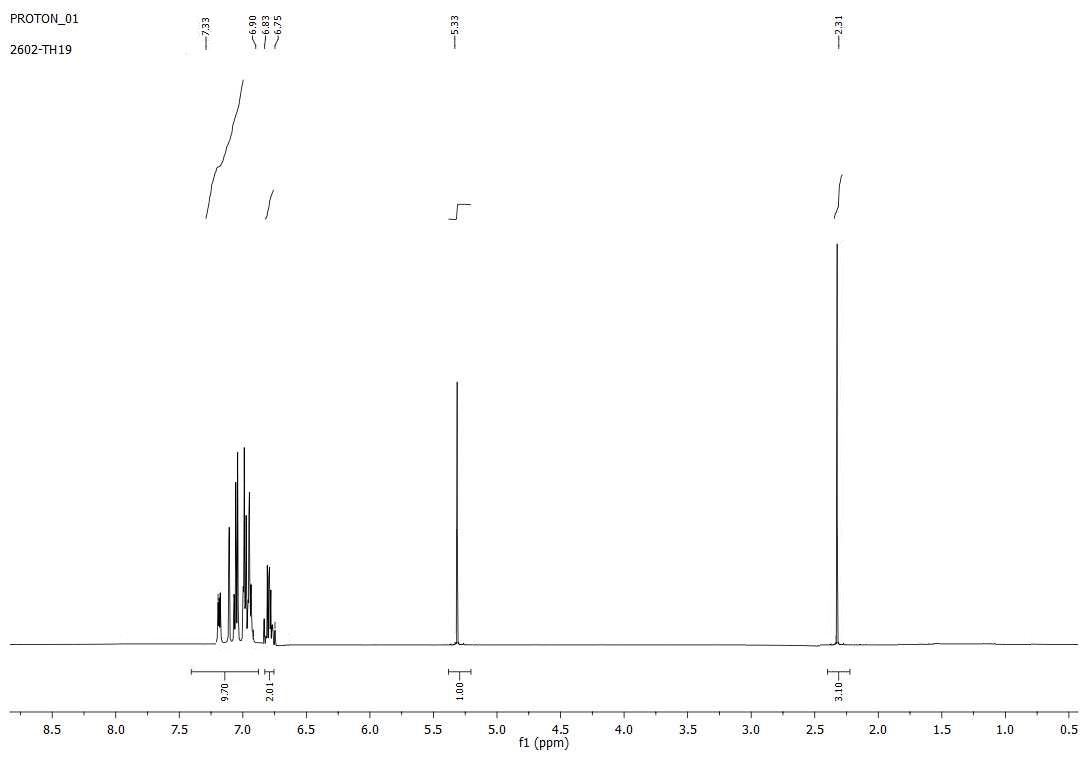


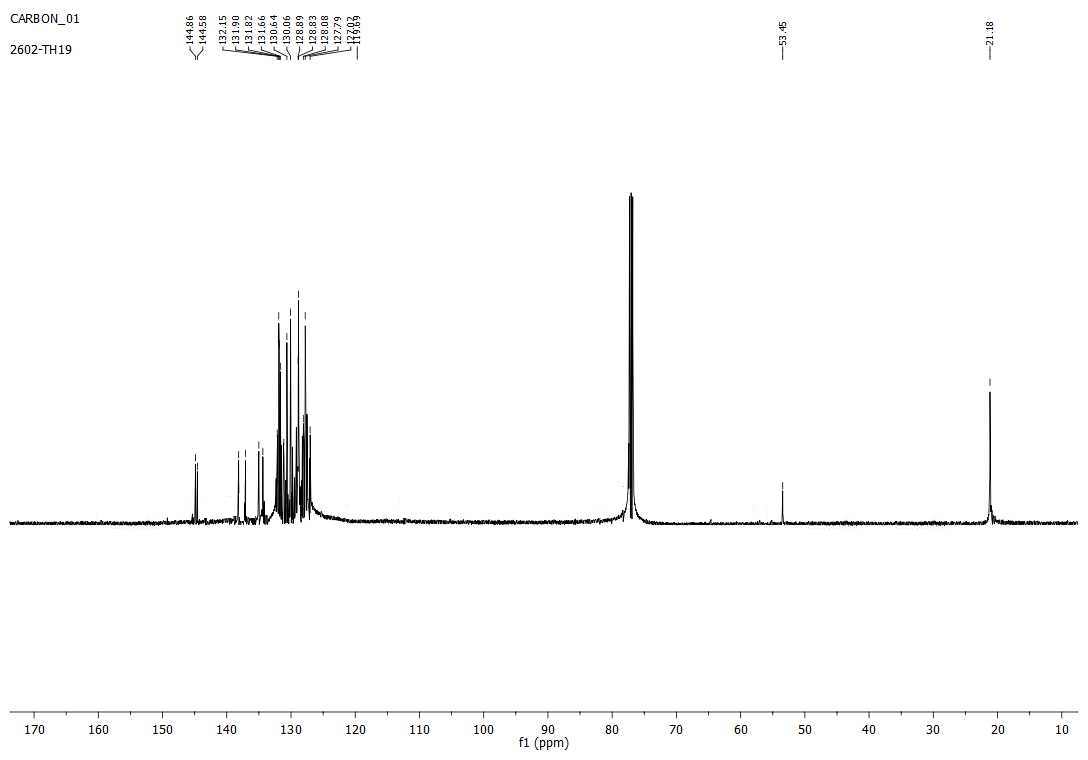


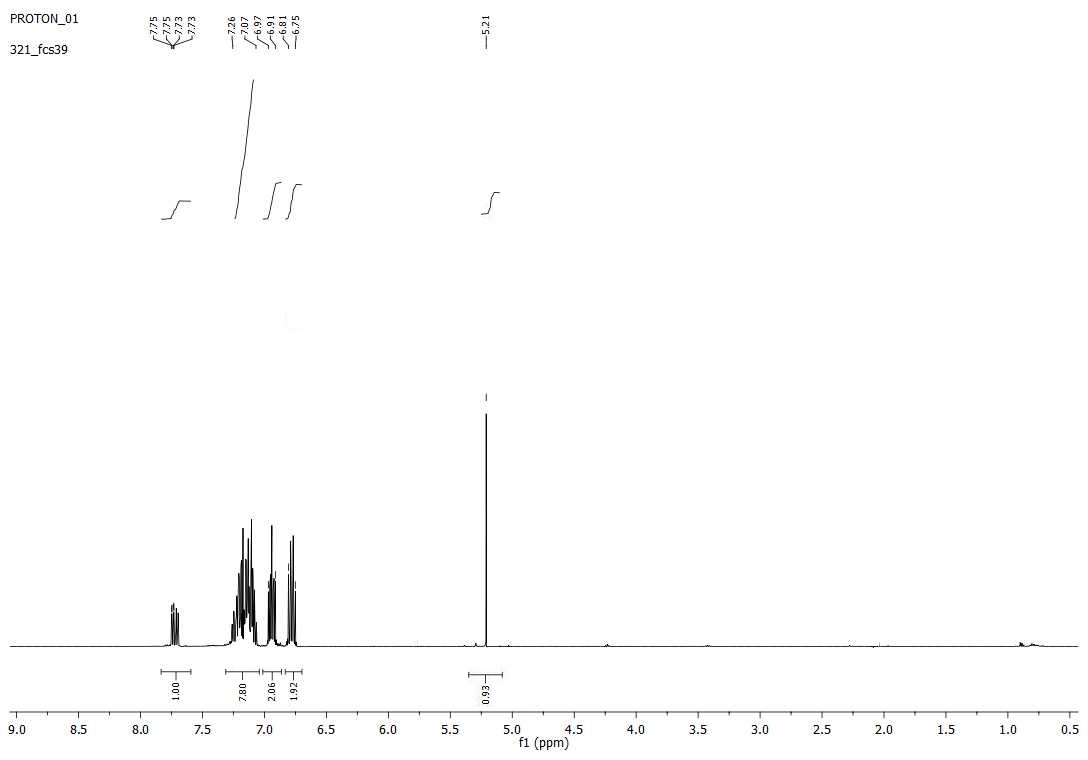


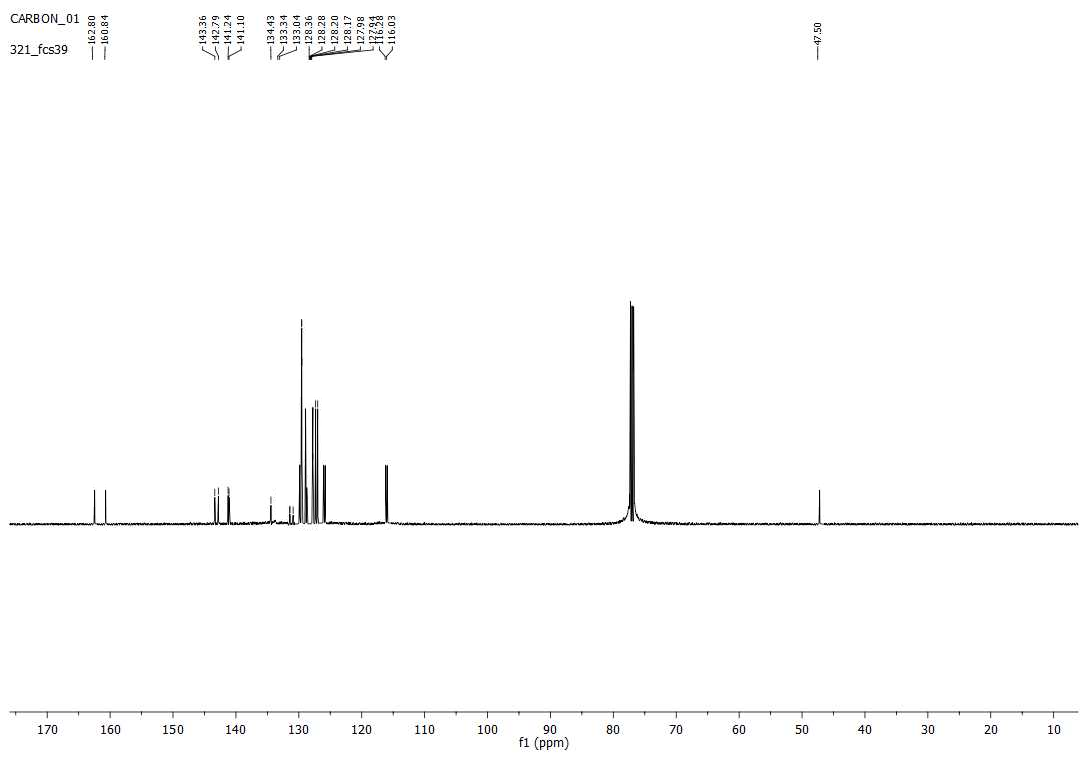


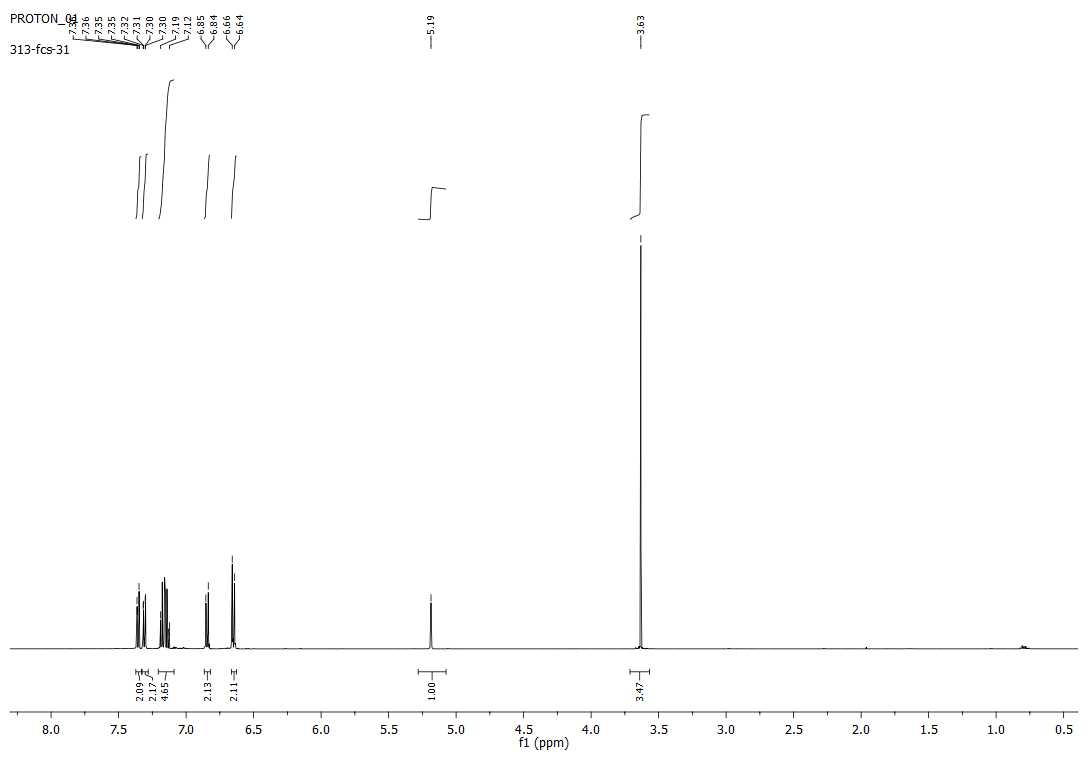


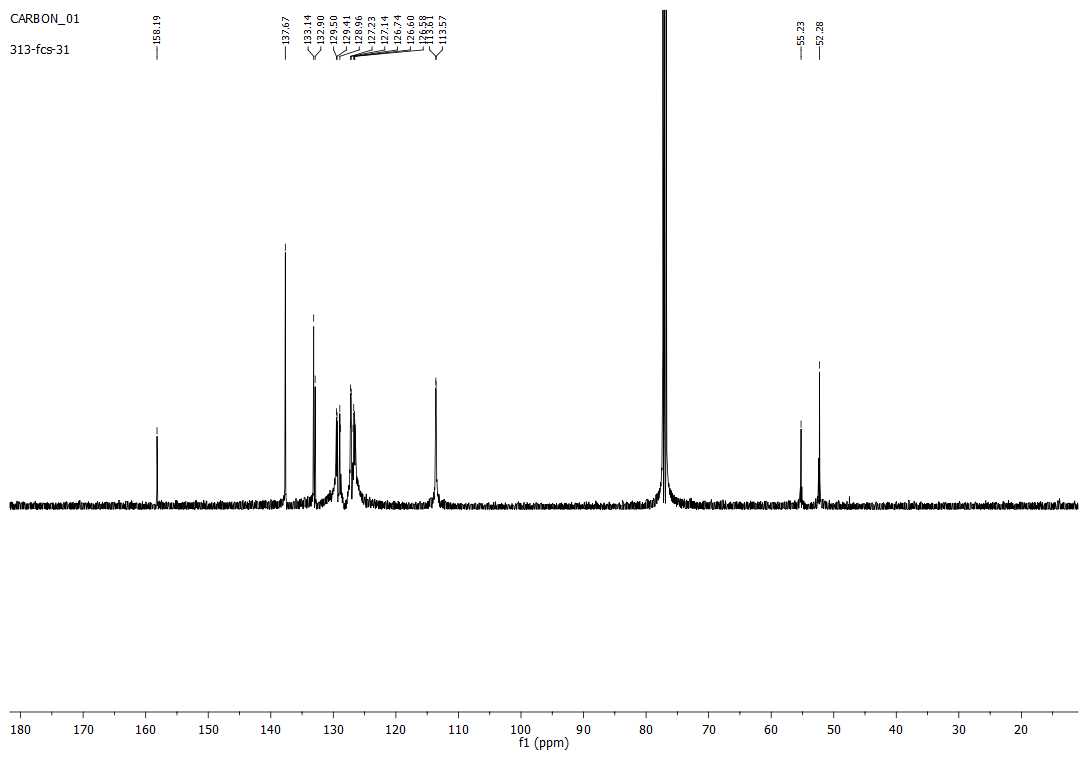


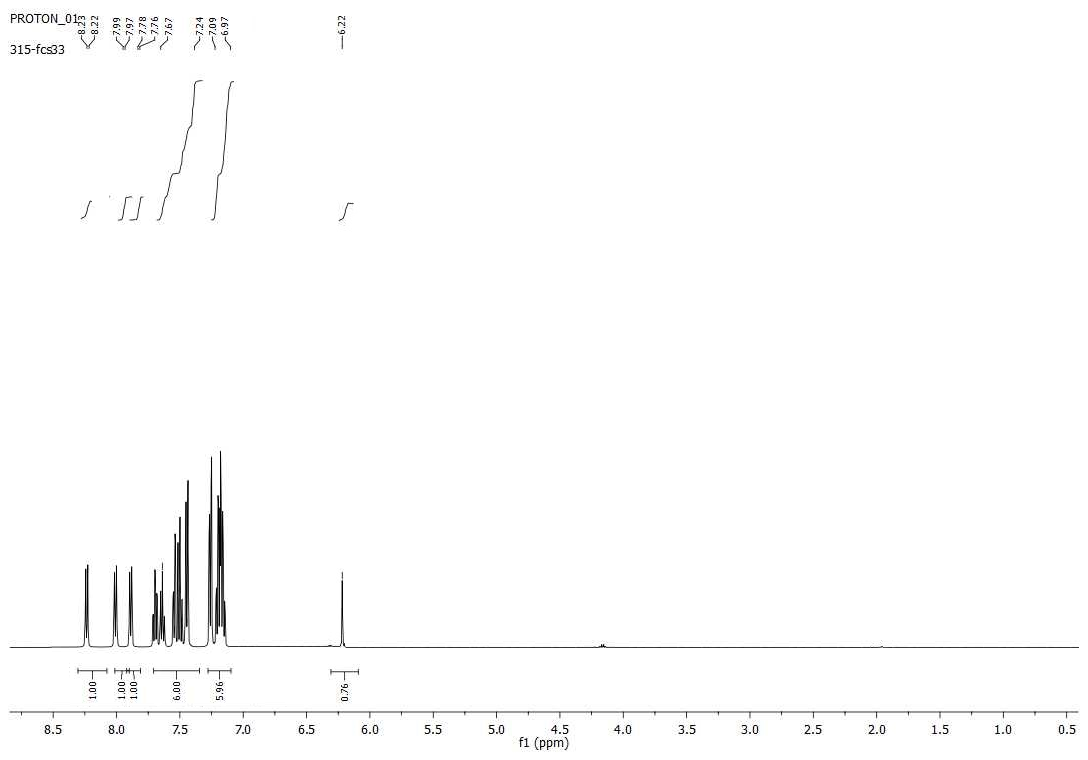


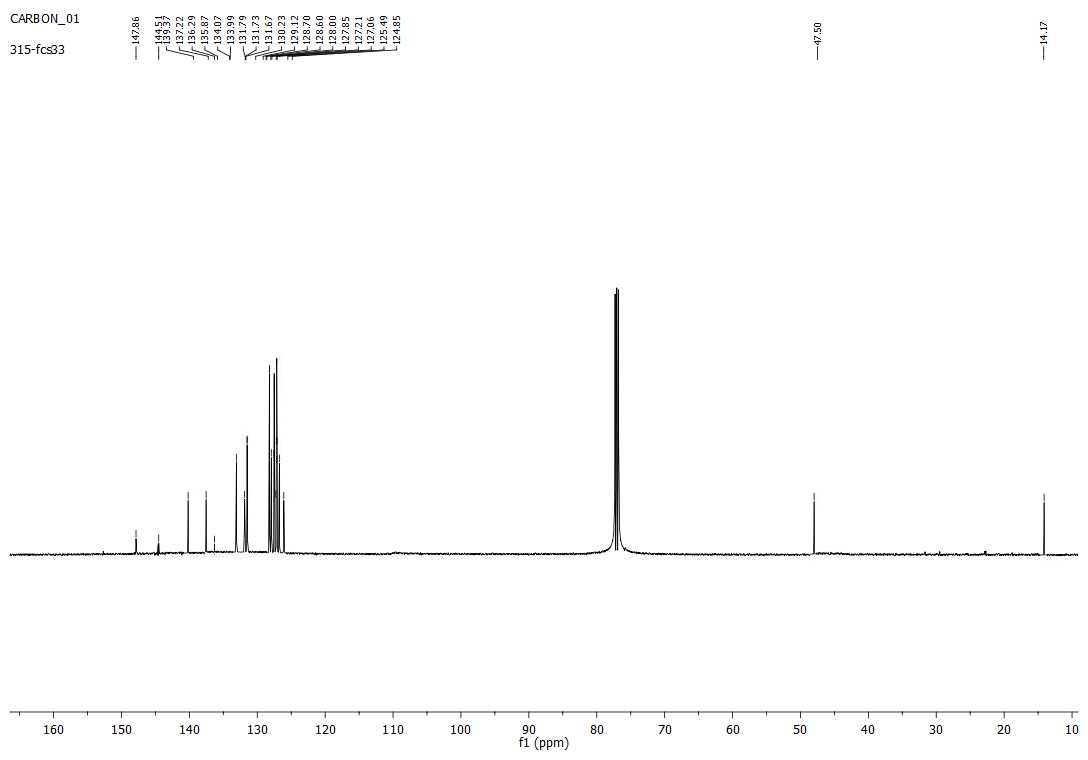


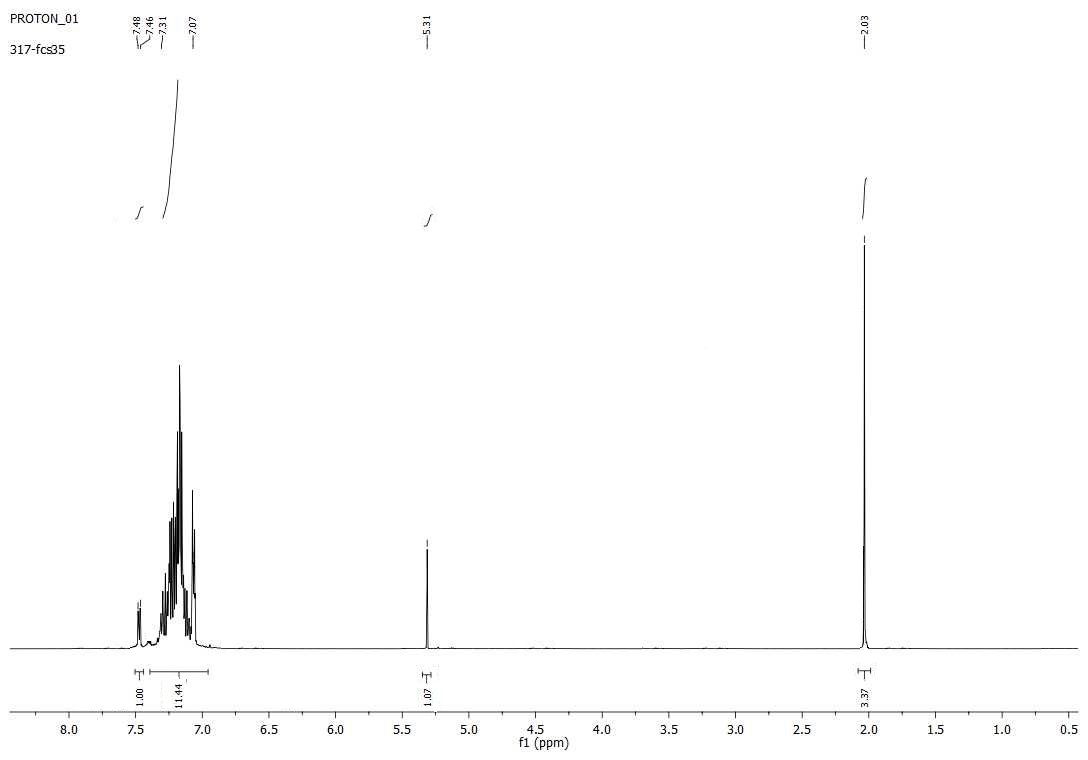


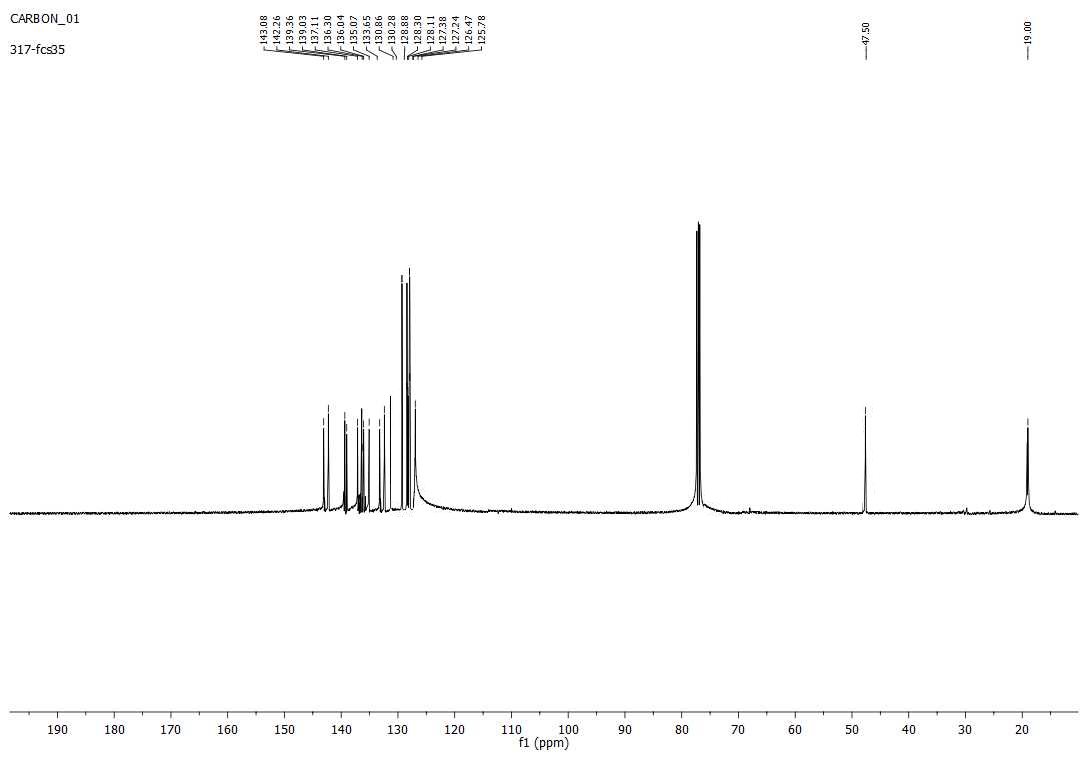


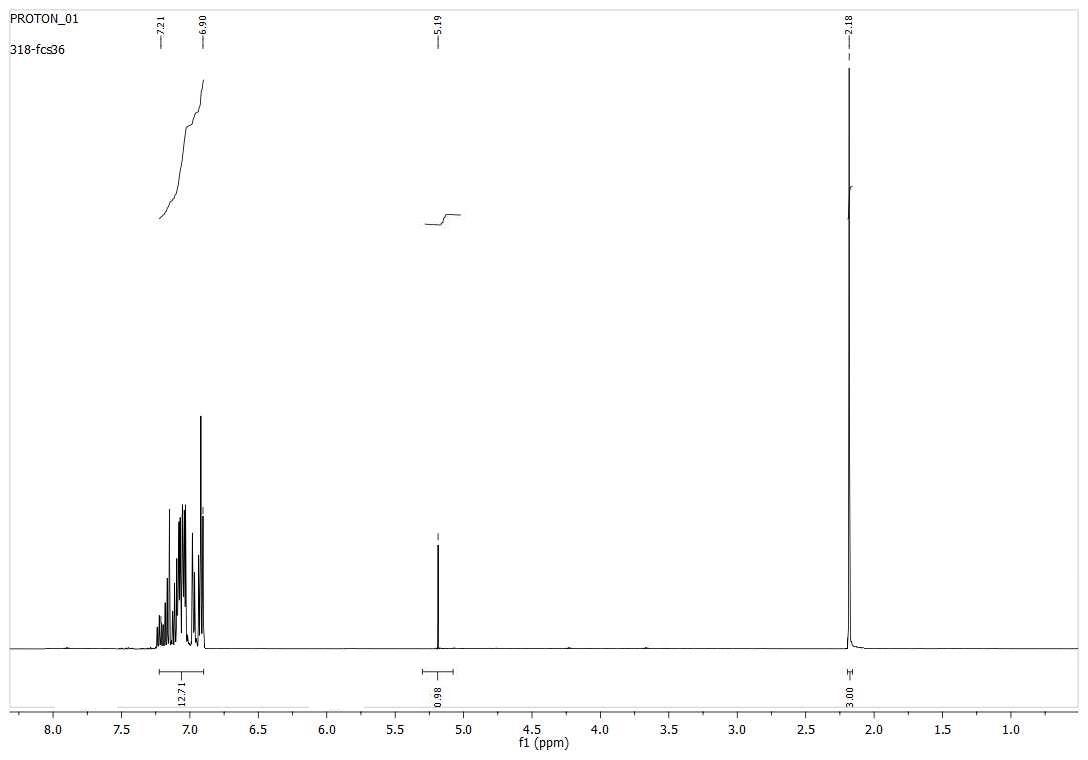


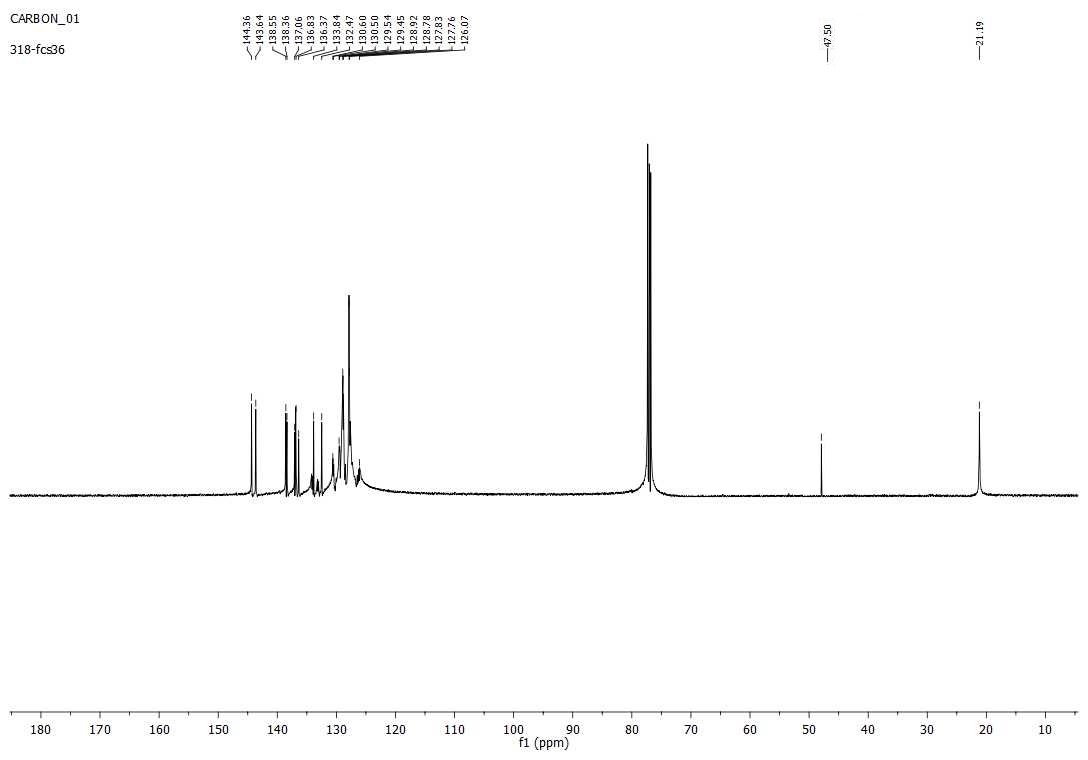


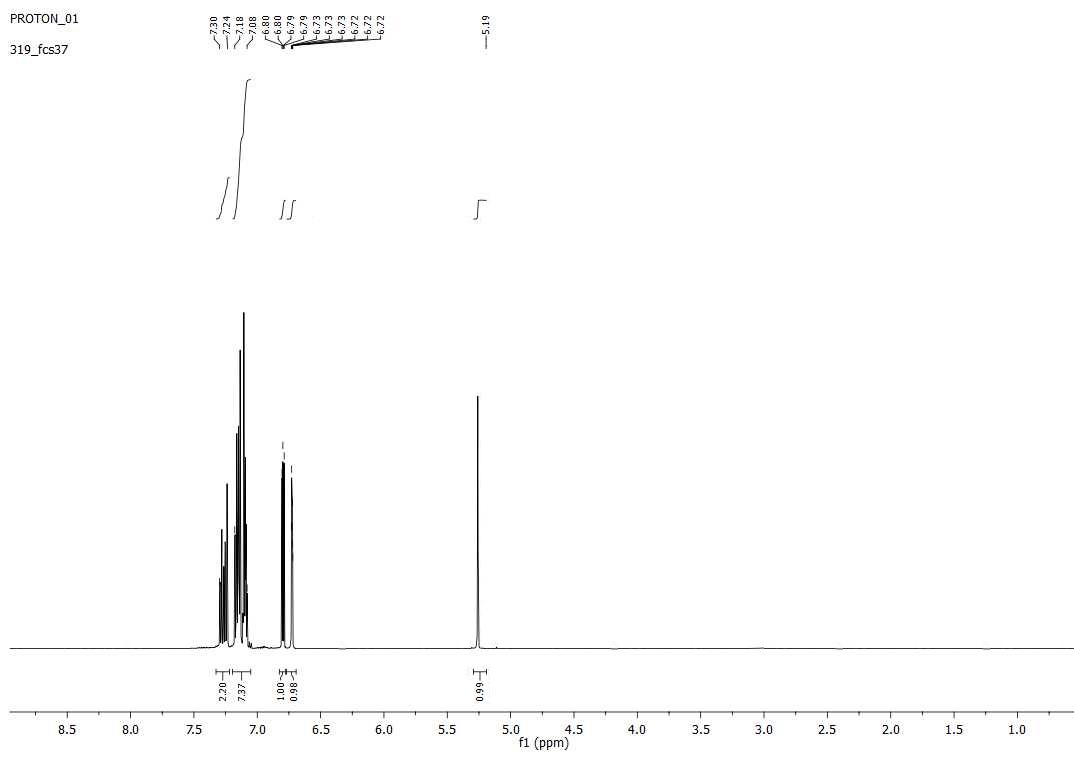


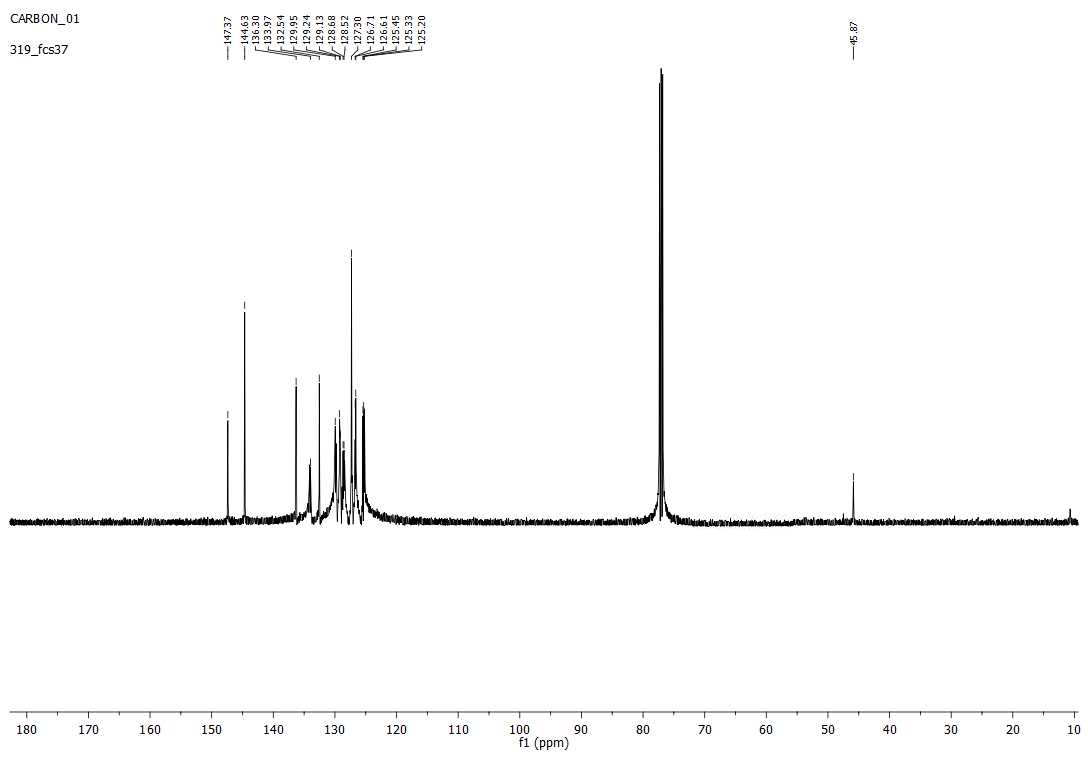


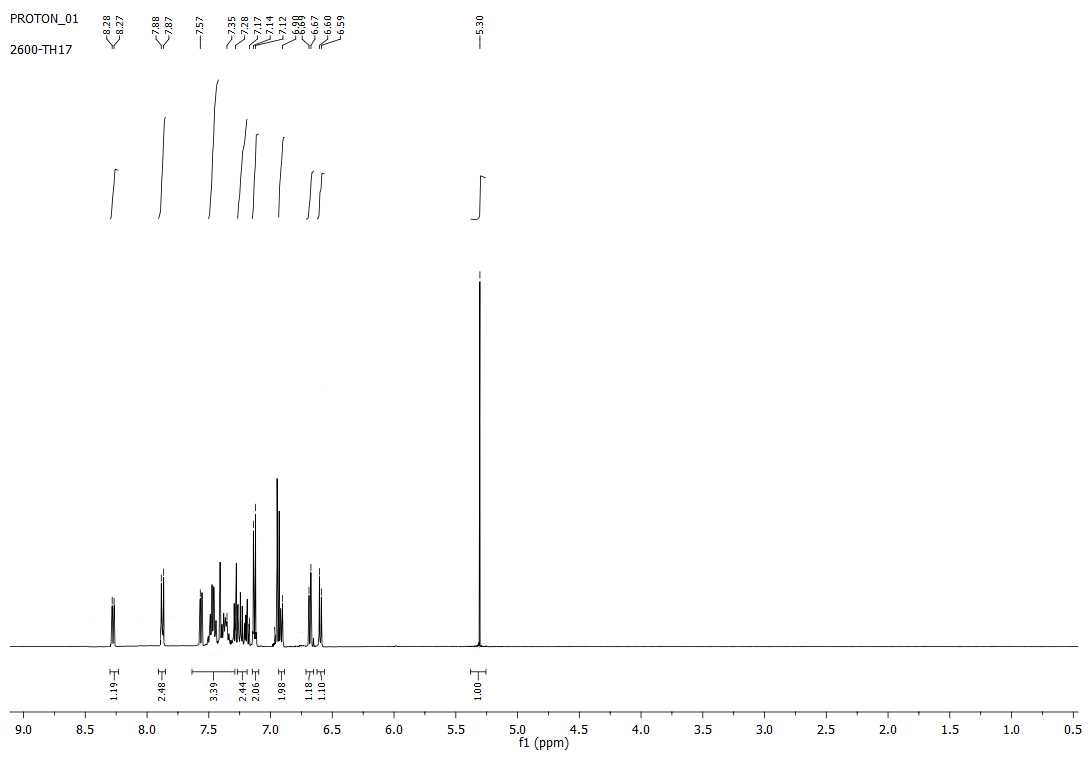


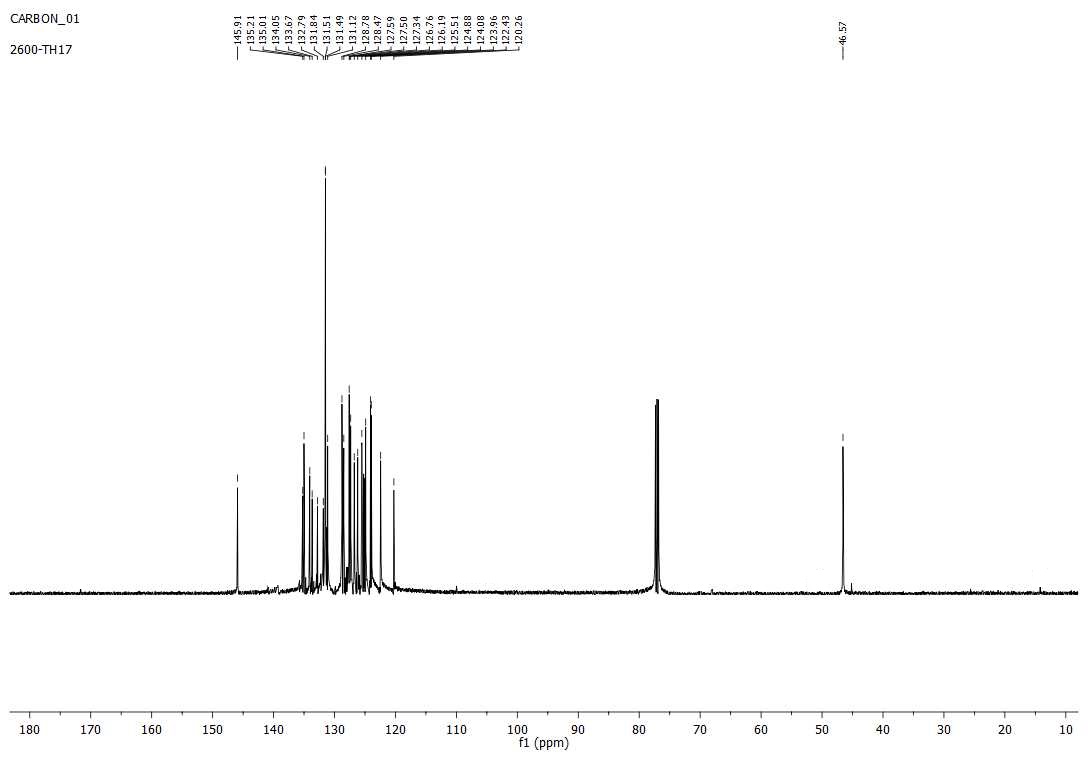


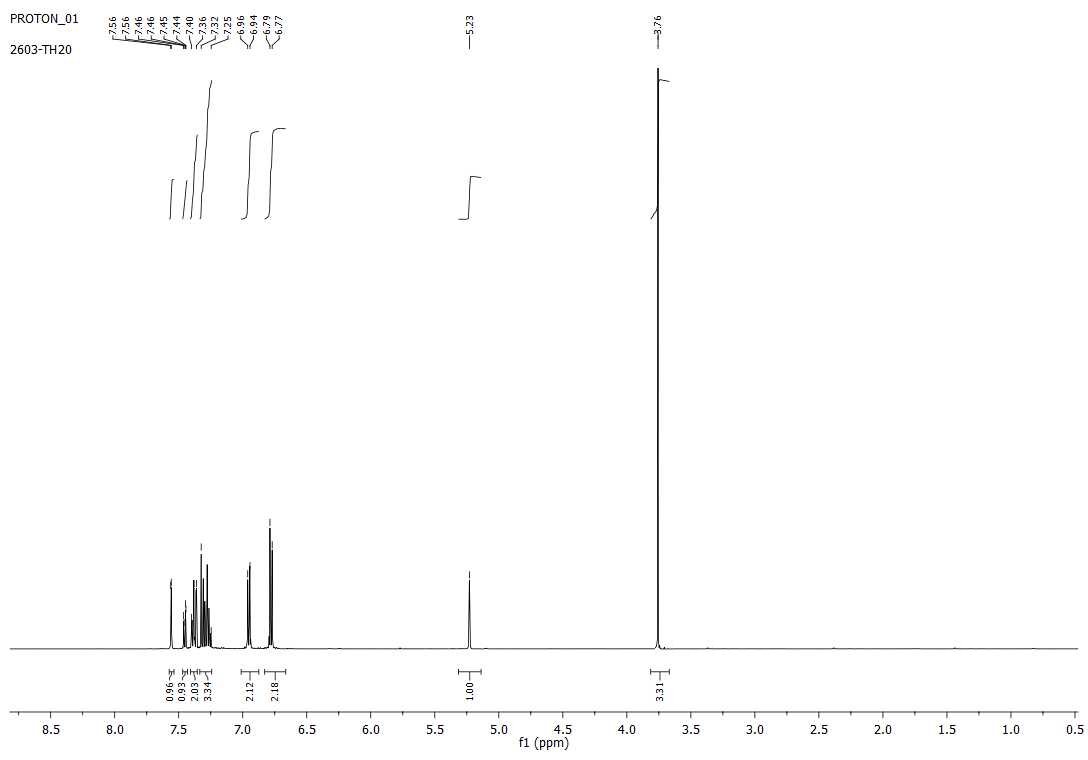


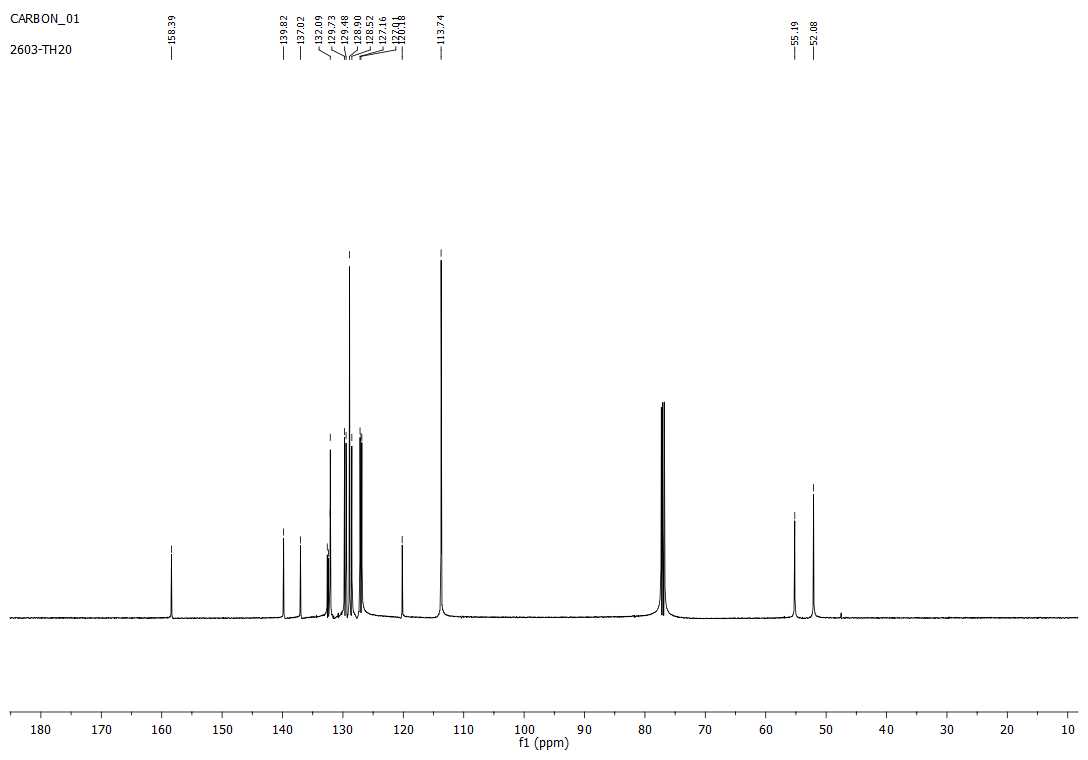


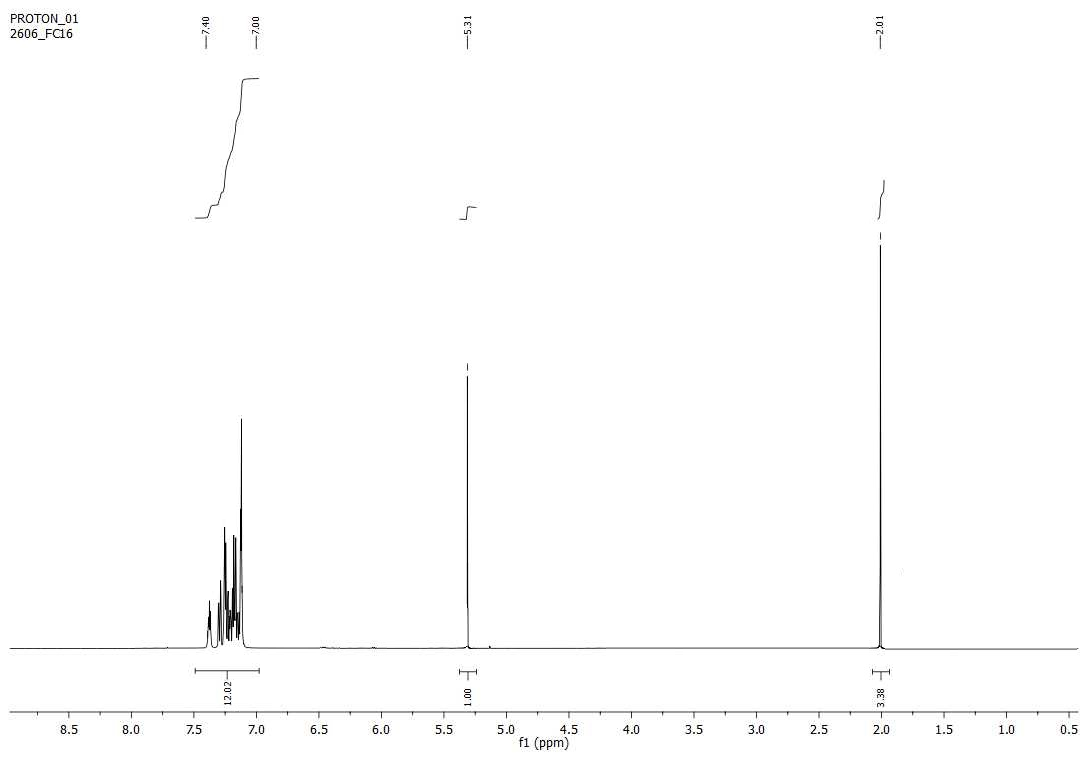


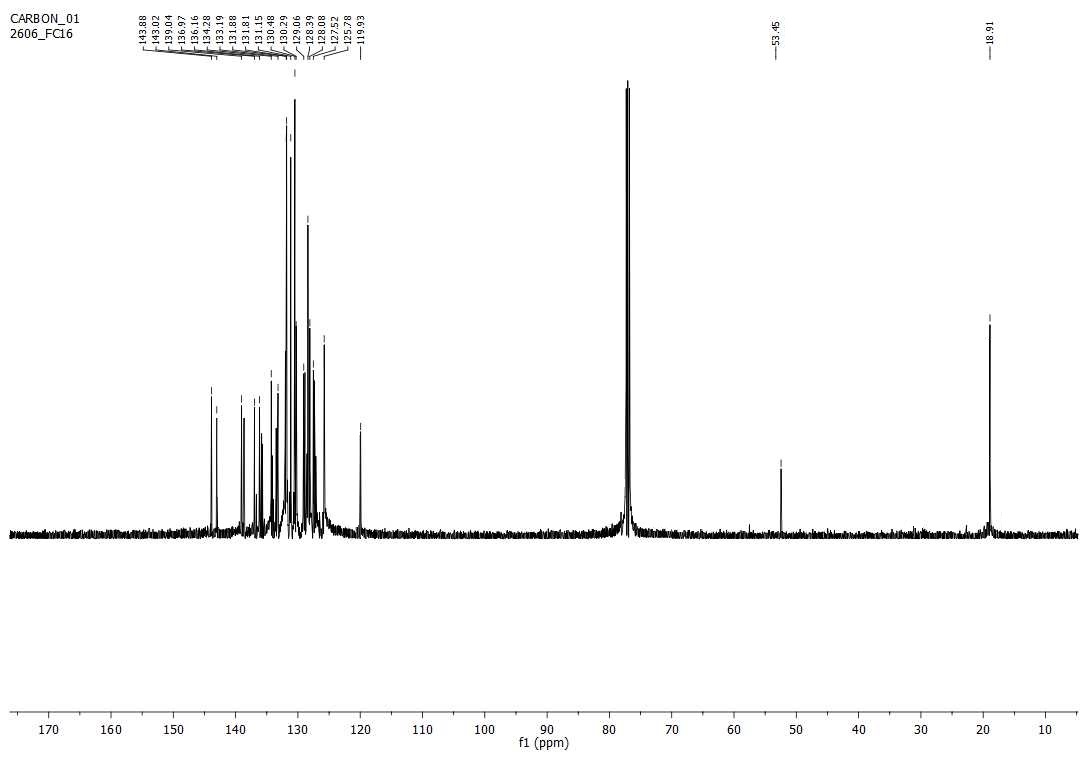


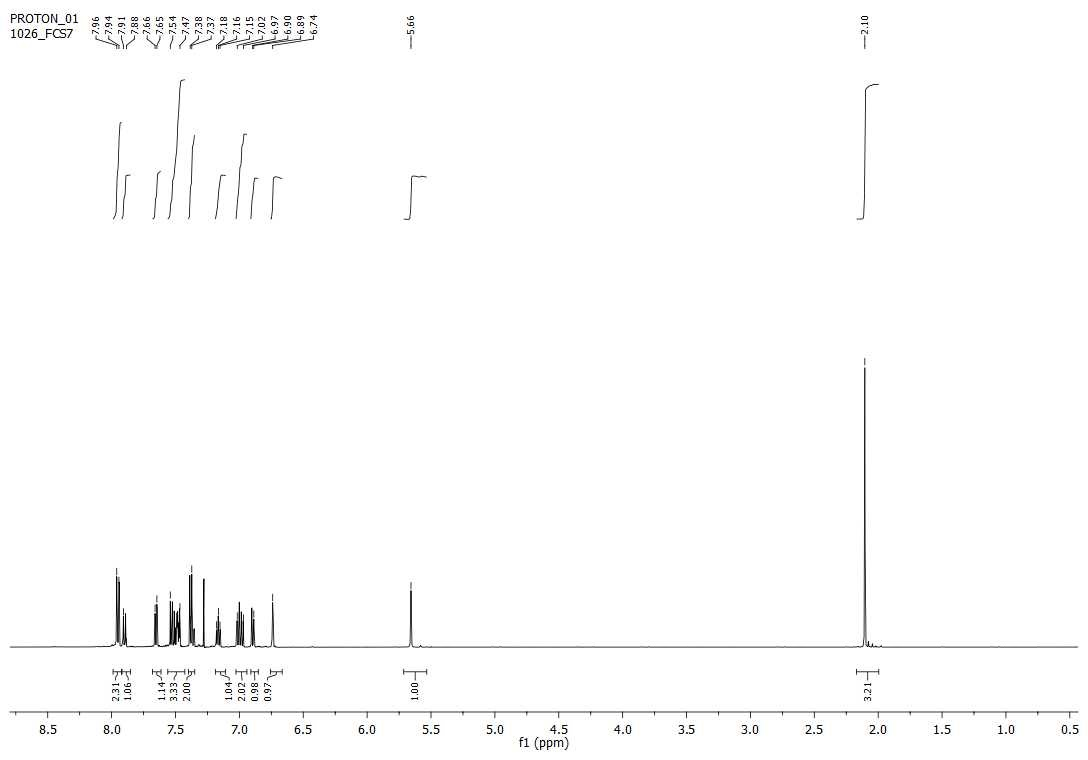


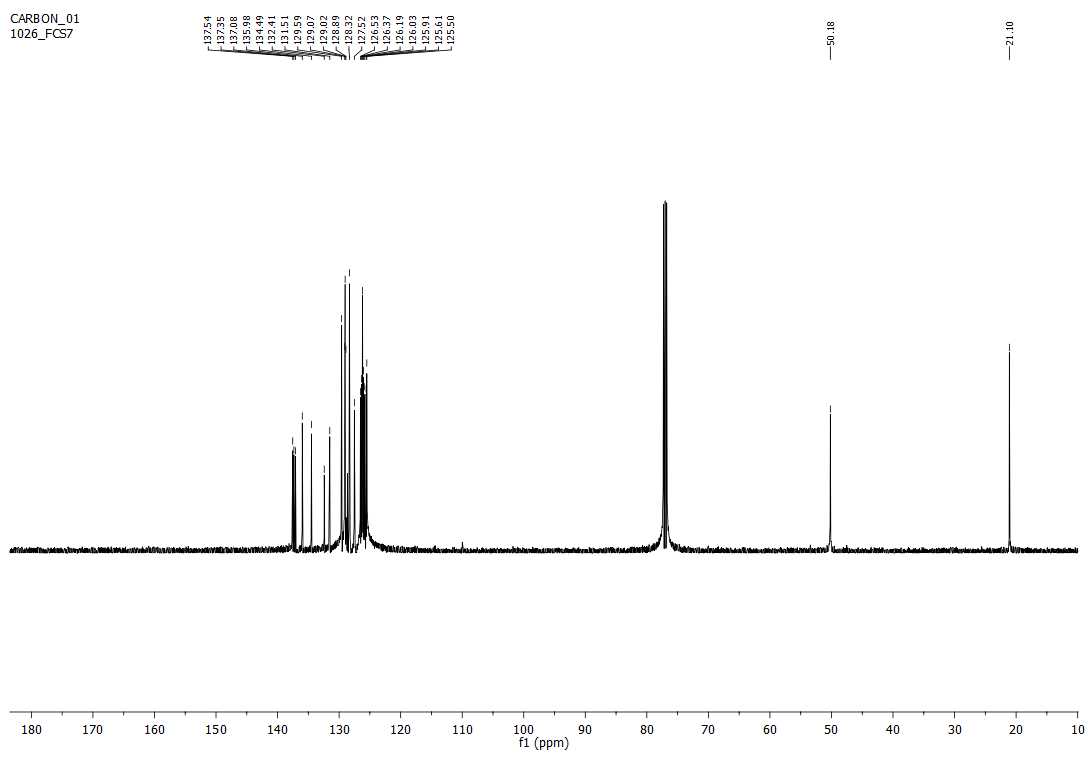


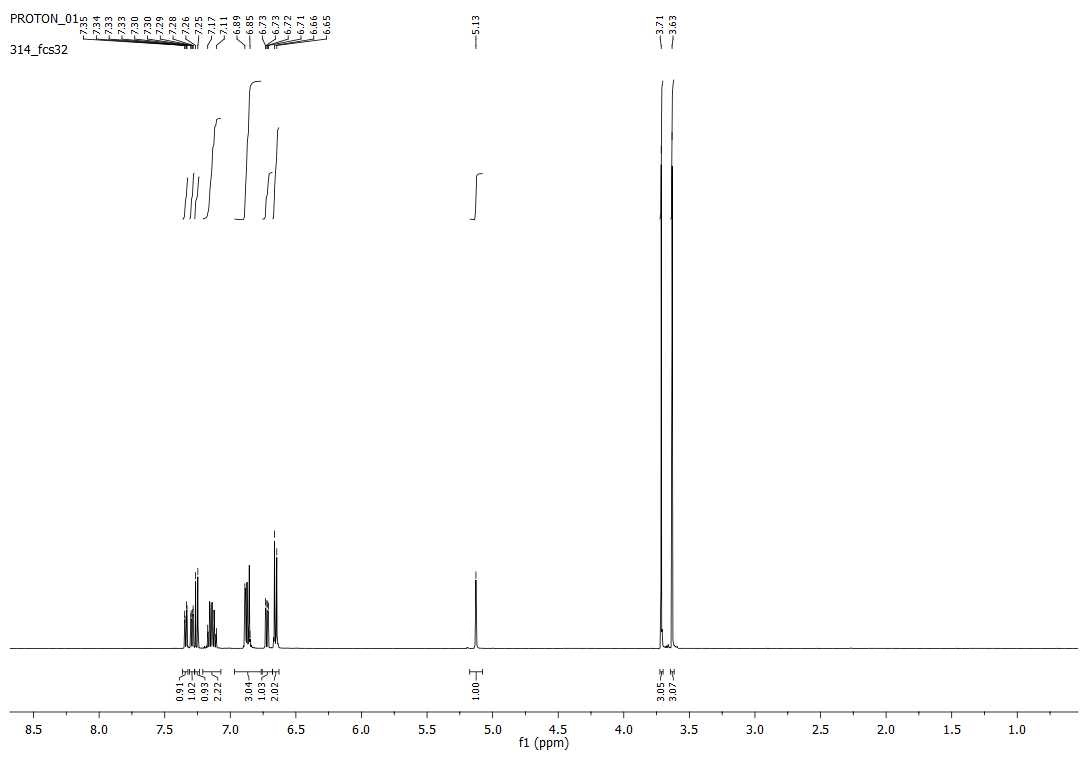


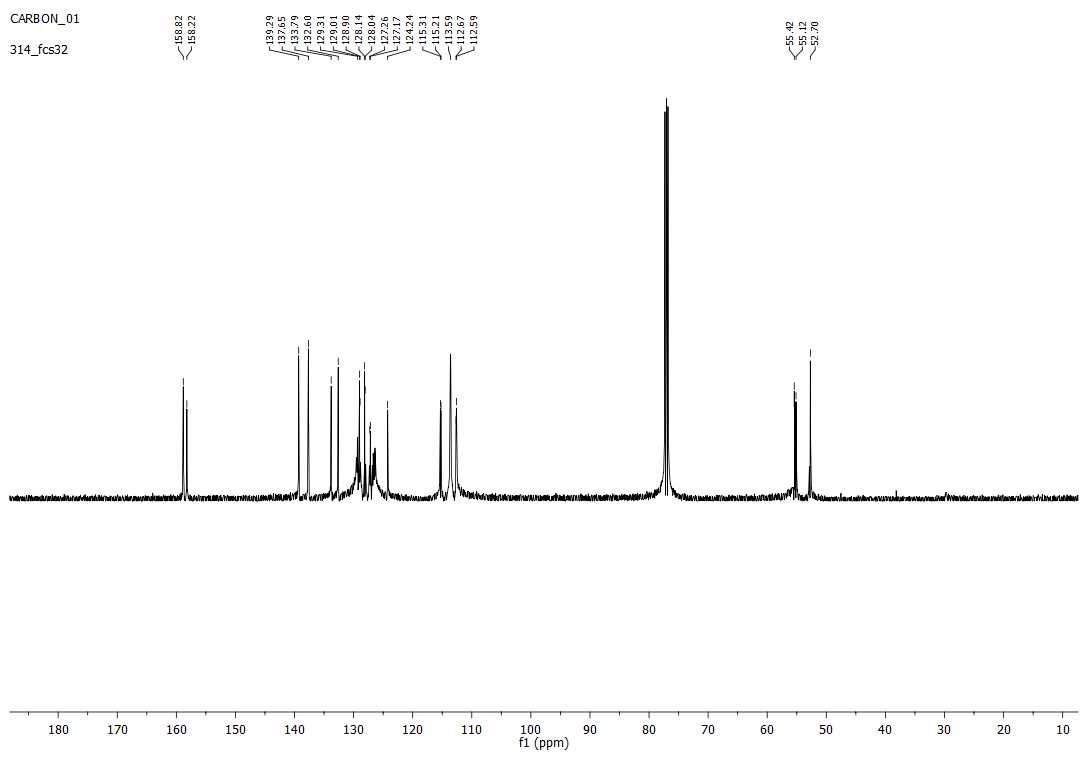


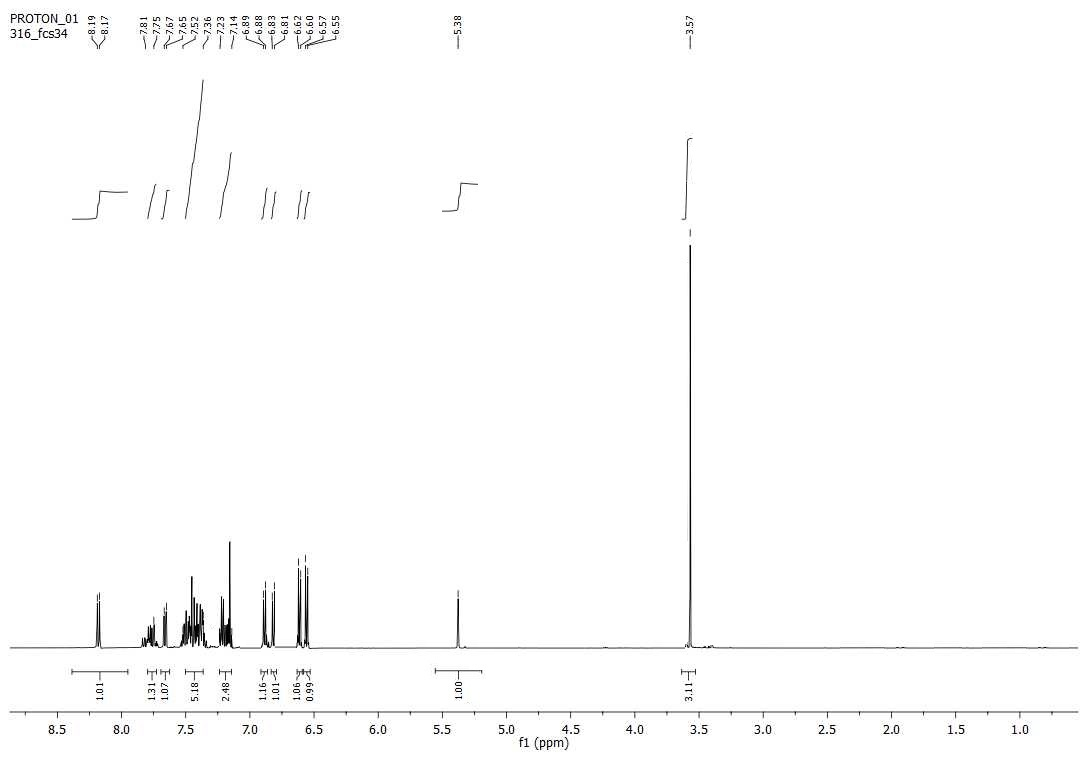


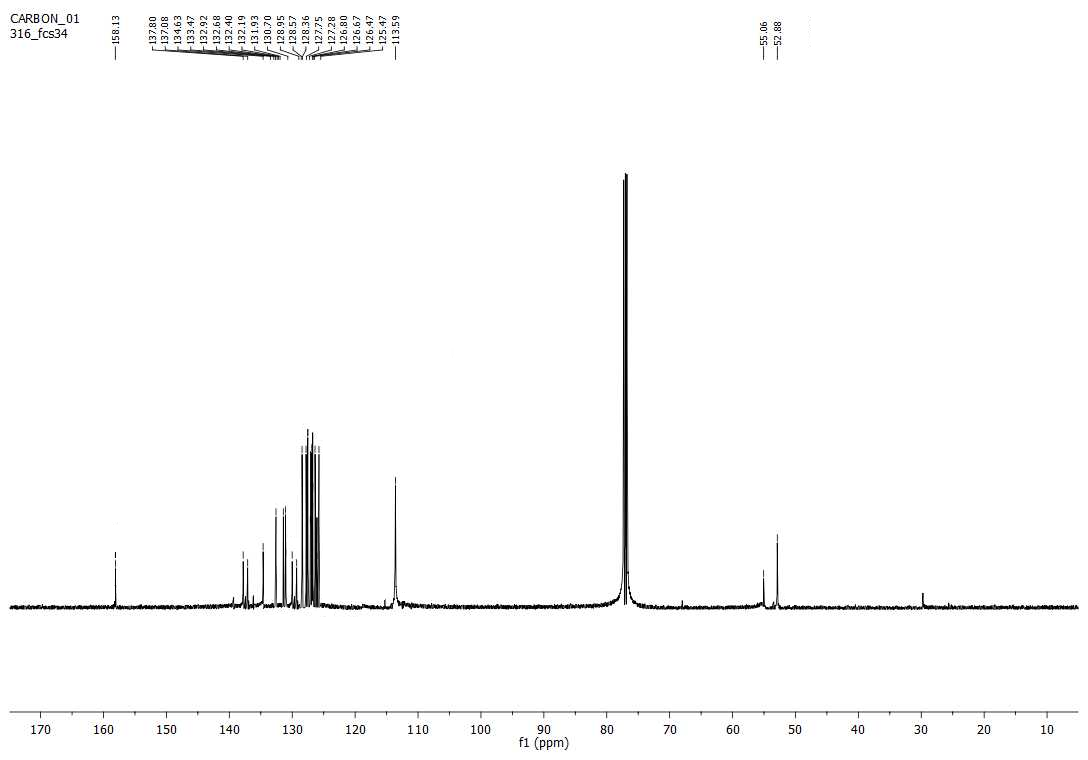


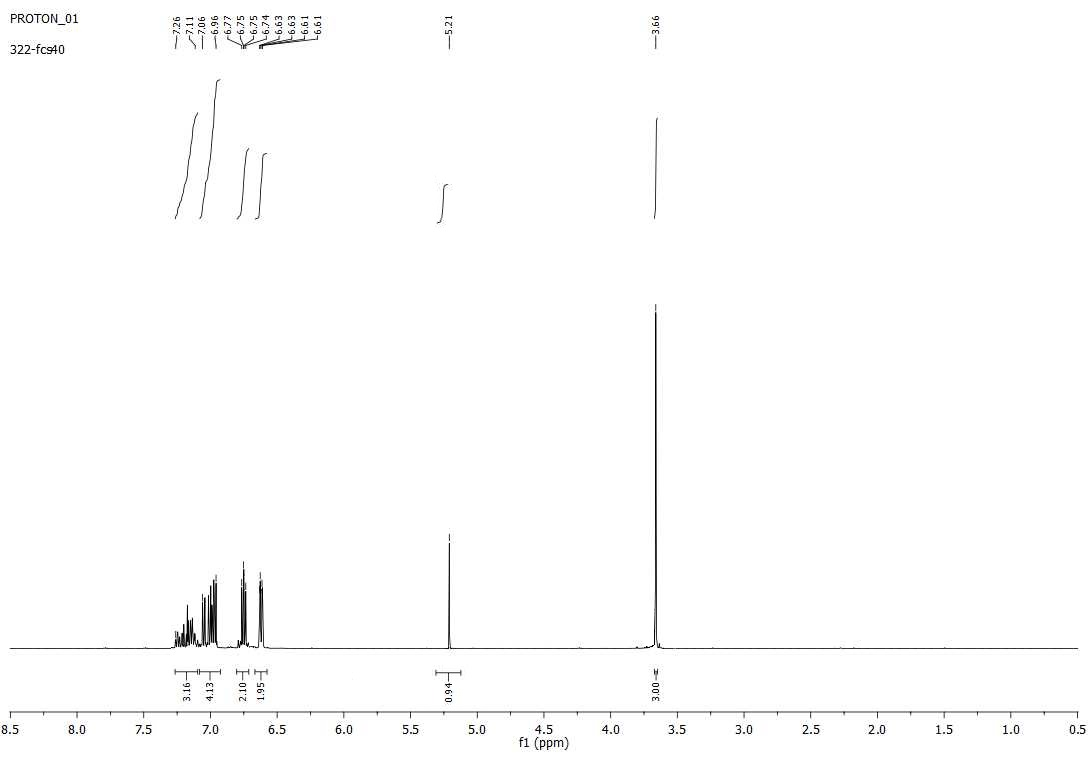


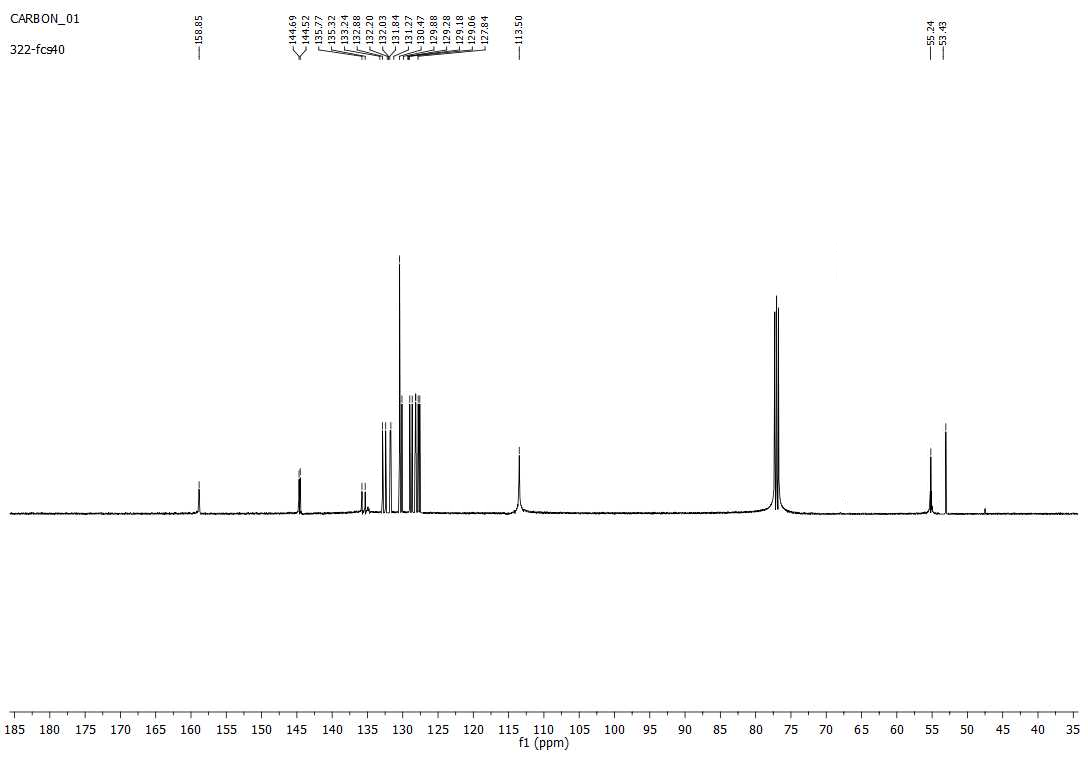


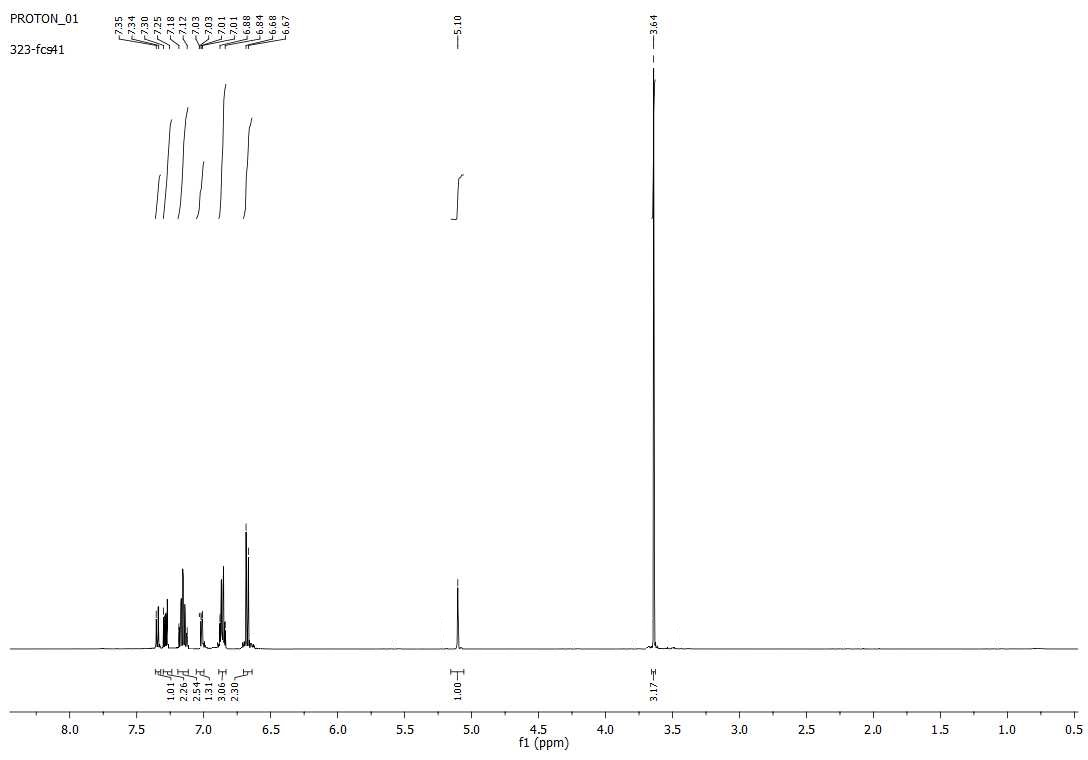


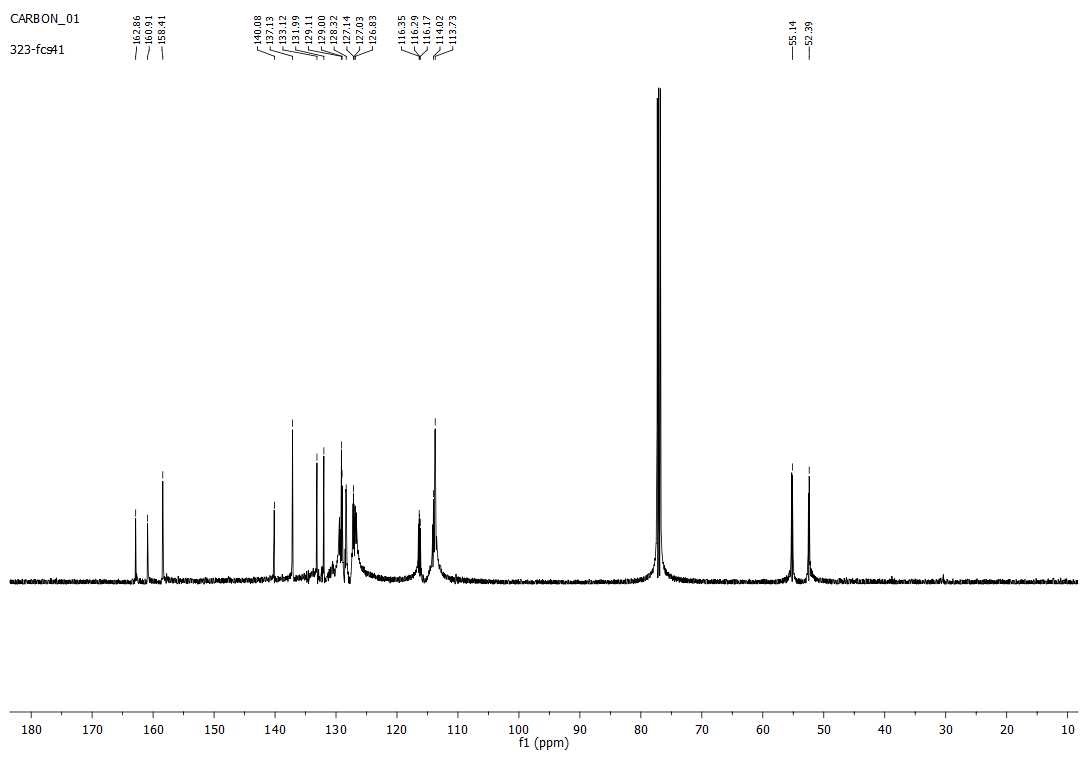


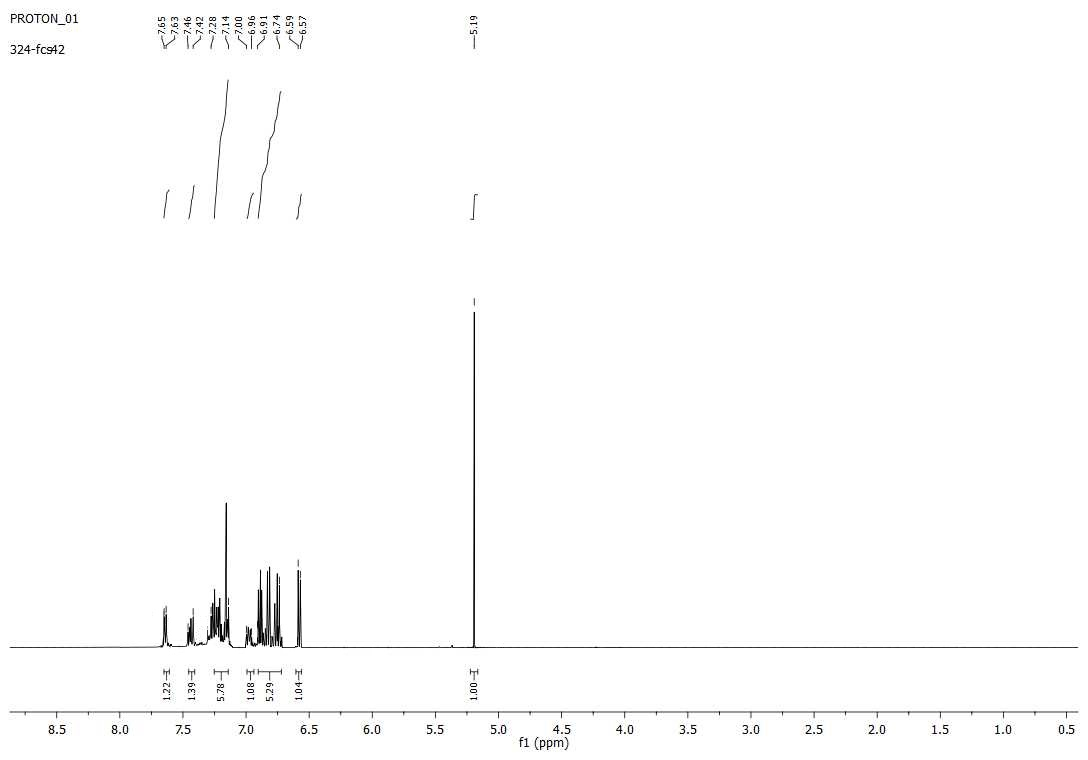


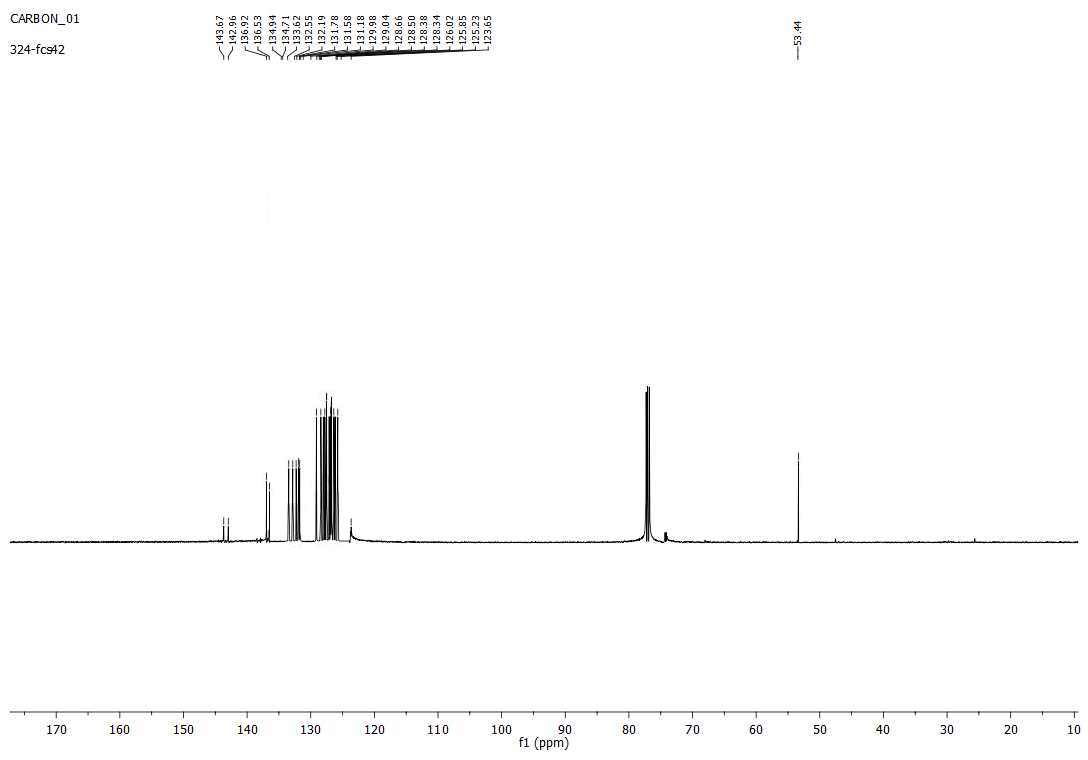


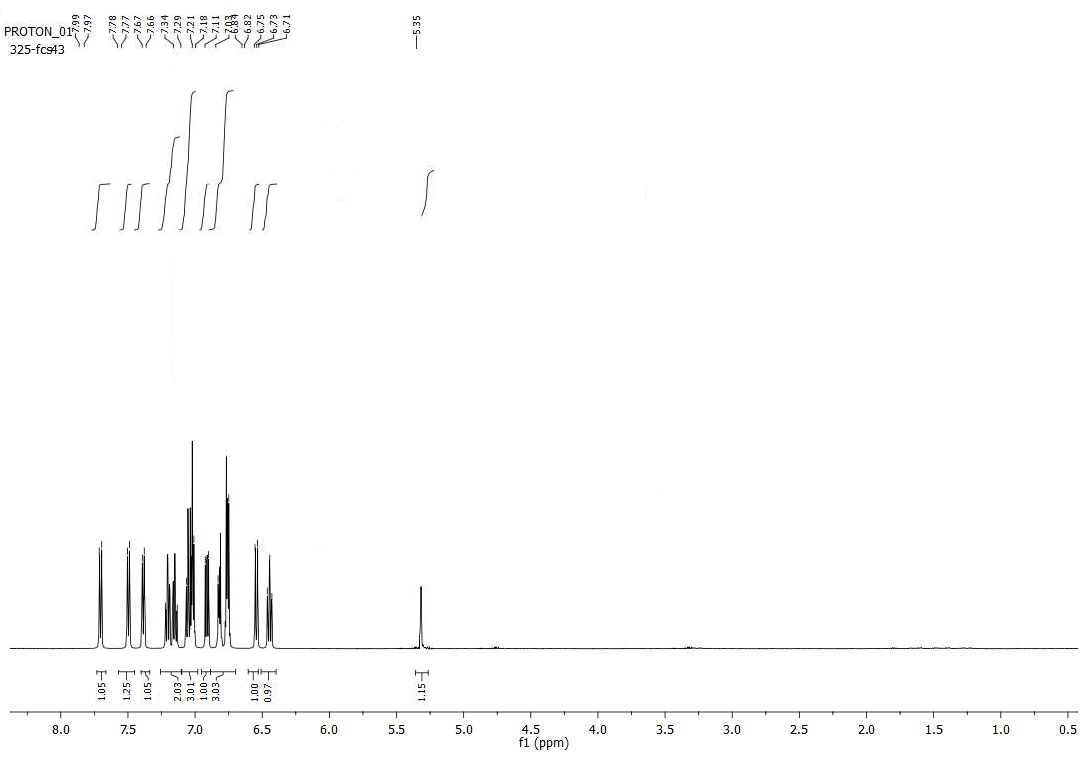


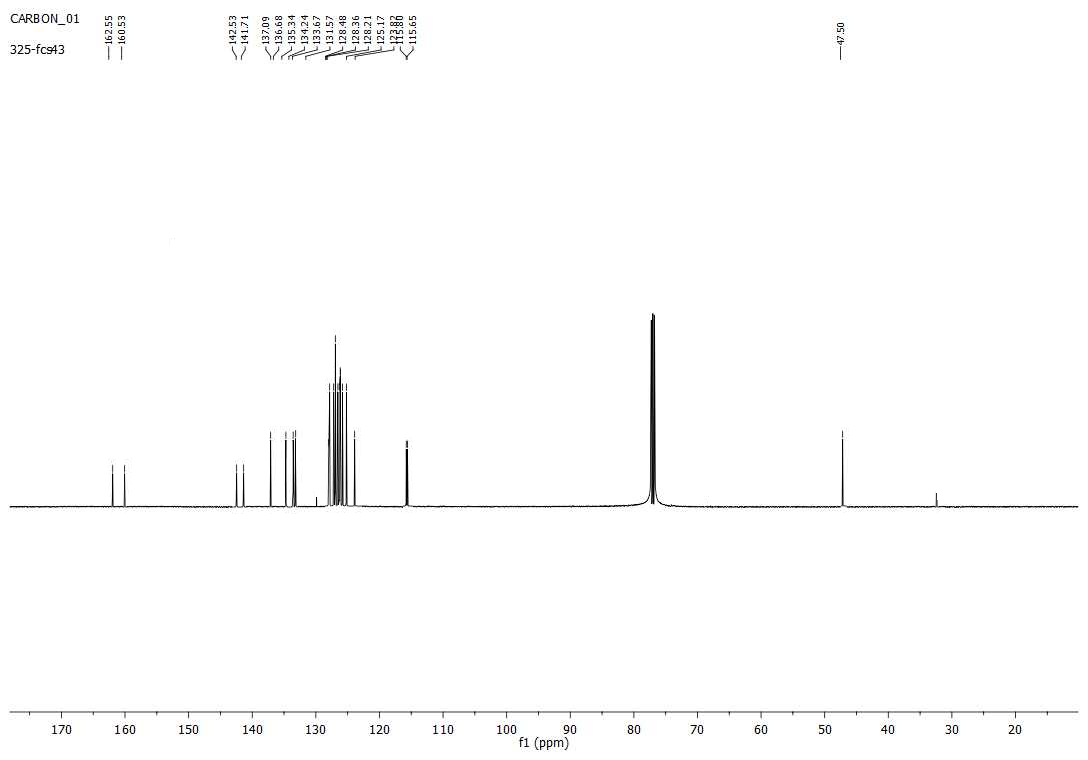

Supplement: Supplementary file 1 [file 12404378]
